# Supplementary material for: Cuproptosis-Related lncRNA Prognostic Profile, Immune microenvironment, Response and Immune-related gene prognostic index in LUAD
Source: Research Square preprint supplement (doi:10.21203/rs.3.rs-3313594/v1), 2023-09-12
Supplement: Supplementary file 1 [file 0179884fe302494d36975307.xlsx]

## Sheet: Sheet1
gene	conMean	treatMean	logFC	pValue	fdr
SYNE3	5.99603	1.83612	-1.70735	2.6976e-23	4.20206e-22
S1PR4	40.7538	11.5241	-1.82228	2.69529e-29	1.53848e-27
ASF1B	6.17197	34.3026	2.47452	2.09715e-27	7.09519e-26
Z99289.2	0.0472426	0.280095	2.56776	0.00282707	0.00419791
NPIPB15	2.46286	5.90182	1.26082	0.00198957	0.00301741
LINC02246	0.052737	0.227075	2.10628	0.00133251	0.00206919
EMBP1	0.518461	1.51972	1.55149	2.53054e-11	9.61529e-11
AC005291.2	0.106263	1.17695	3.46935	6.08024e-09	1.75079e-08
DEFB131E	0.00564815	0.15874	4.81274	8.24099e-11	2.947e-10
AC025766.1	0.450354	1.68158	1.90069	3.16323e-13	1.47766e-12
SMTNL2	5.6023	1.74728	-1.68091	2.05121e-23	3.25882e-22
AC010285.1	0.0816019	0.459133	2.49224	6.57255e-08	1.69358e-07
SPA17P1	0.837698	0.313669	-1.41719	2.45501e-12	1.0433e-11
KRT18P65	0.0466852	0.121815	1.38365	1.75817e-06	3.86388e-06
AC007546.3	0.0609648	0.310037	2.34639	4.81647e-11	1.77053e-10
GPM6B	20.528	5.34421	-1.94155	7.41367e-28	2.85309e-26
LRRC32	124.878	23.0093	-2.44023	1.28039e-28	5.98337e-27
MIR4539	3.72611	9.73066	1.38487	5.25715e-06	1.09759e-05
AL355303.1	0.0730037	0.291197	1.99595	0.00145922	0.00225417
LINC00607	1.58505	0.632739	-1.32484	6.07543e-24	1.05097e-22
ZNF681	1.67669	3.86294	1.20408	9.76319e-13	4.32329e-12
CYP4F26P	0.188257	0.491095	1.3833	0.0239365	0.0310667
TRIM31	0.589563	8.65607	3.87599	1.51097e-16	1.02044e-15
LMO7DN-IT1	2.39074	0.950154	-1.33122	2.83764e-11	1.07104e-10
TRGJP1	1.85571	0.421363	-2.13884	5.11105e-17	3.66625e-16
AC079753.2	0.0101574	0.154122	3.92346	6.55455e-08	1.68946e-07
OR4C6	0.0158037	0.475479	4.91105	1.92112e-07	4.69696e-07
AL353135.2	0.313057	0.846805	1.4356	8.84433e-10	2.79667e-09
IGHV3-60	0.868567	3.50625	2.01322	2.22765e-10	7.5553e-10
AC103718.1	0.0167204	1.00334	5.90706	4.18079e-25	8.59572e-24
RNU6-892P	2.26213	0.976104	-1.21258	9.14893e-09	2.5831e-08
LGALSL	61.3908	17.5235	-1.80873	1.84694e-27	6.35103e-26
GCLC	8.14941	39.9791	2.29448	9.12163e-10	2.87864e-09
HNRNPA1P40	0.0836333	0.314284	1.90992	9.1446e-05	0.000164835
DMC1	0.448054	0.917266	1.03367	0.000359997	0.000602553
AC105137.2	0.18088	0.67574	1.90144	8.87034e-15	4.95028e-14
DUOXA1	41.8879	10.2398	-2.03234	1.07738e-27	3.95531e-26
TBX6	1.72339	3.64865	1.08212	1.7704e-07	4.34595e-07
EDN1	170.341	42.7411	-1.99473	6.30569e-22	8.16285e-21
AC103591.4	2.93468	1.12146	-1.38782	2.40052e-23	3.77853e-22
SYNGR4	0.0612611	1.38199	4.49563	3.29801e-22	4.42888e-21
STARD13	22.2991	5.64541	-1.98184	4.15742e-31	5.58302e-29
SNORA22B	0.650024	1.92696	1.56776	0.00988028	0.0135915
CLEC6A	2.57948	0.84796	-1.60501	3.50825e-14	1.82679e-13
NOX1	1.02165	2.82717	1.46846	1.26069e-13	6.15509e-13
MEST	17.317	42.5382	1.29657	2.65325e-19	2.4898e-18
MIR210HG	5.11544	10.9931	1.10366	2.94358e-09	8.78633e-09
CES1	313.289	153.922	-1.02529	7.63223e-22	9.74657e-21
RN7SKP198	0.135756	0.333947	1.29861	0.0107646	0.0147239
GLS2	0.100737	0.21387	1.08614	4.87235e-07	1.13667e-06
H3-4	0.120239	0.267213	1.15209	0.00800652	0.0111583
AL139128.1	0.200904	0.920308	2.19561	2.03055e-10	6.91708e-10
DIPK2B	22.654	6.36531	-1.83146	1.95477e-22	2.70477e-21
GFRA2	2.35539	0.729545	-1.69089	1.03386e-24	2.0106e-23
AC004884.2	0.224843	2.2087	3.29621	3.24407e-10	1.0803e-09
SMAD9	14.7449	5.37275	-1.45648	3.06357e-24	5.53198e-23
IGHV1-24	36.3191	358.312	3.30242	1.49152e-13	7.21578e-13
AL121832.1	0.0993722	0.294604	1.56786	0.0001856	0.000322412
AL035420.1	0.0503704	0.130187	1.36994	0.000476408	0.000784533
CASZ1	9.73926	4.65755	-1.06424	1.49412e-16	1.0104e-15
BARD1	2.85015	6.82143	1.25904	1.32135e-19	1.28337e-18
RNU6-282P	0.537187	2.04243	1.92679	4.12877e-08	1.08637e-07
CAMTA1-AS1	0.217137	0.0910383	-1.25406	8.461e-05	0.000153123
AGTPBP1	28.6611	12.7834	-1.16482	6.47746e-27	1.97694e-25
NDNF	228.759	68.9276	-1.73067	7.7316e-26	1.84366e-24
LINC00924	0.870528	0.380761	-1.193	5.28136e-17	3.77849e-16
ACE	44.2571	13.2918	-1.73537	5.18396e-27	1.61303e-25
AC007342.8	1.35451	3.05464	1.17324	5.0241e-06	1.05143e-05
RNF2P1	0.0607759	0.21819	1.84401	0.00395522	0.00575849
AC092645.2	0.341611	1.14569	1.74579	1.44953e-11	5.66043e-11
FAM96AP2	0.667261	1.89543	1.5062	0.000201354	0.00034793
AL513314.2	0.116335	0.4566	1.97264	1.74393e-10	5.9839e-10
GNGT1	0.0146241	1.29229	6.46544	1.61817e-16	1.08938e-15
RNU6-1005P	0.489881	2.12167	2.1147	0.0154287	0.0206085
NUP210L	0.247193	1.43697	2.53932	5.98193e-09	1.72404e-08
MUC5AC	5.5116	43.8364	2.99159	0.00490688	0.00704367
AL513548.4	0.181339	2.19103	3.59485	0.0305963	0.0390781
SLCO2B1	76.5423	29.0356	-1.39844	4.03092e-24	7.13734e-23
C7orf61	0.267543	0.702273	1.39226	5.32881e-09	1.54751e-08
TCN1	0.718196	56.6826	6.30238	4.94576e-12	2.03076e-11
ITPRID2	91.6342	40.8622	-1.16512	5.7078e-26	1.40168e-24
PPP1R14A	68.1466	16.8982	-2.01177	1.5022e-28	6.90606e-27
SLC25A25-AS1	2.11876	4.58761	1.11452	3.4105e-08	9.04845e-08
LINC02031	0.423881	0.186858	-1.18172	1.0969e-06	2.45956e-06
RNU6ATAC	0.309704	7.9133	4.67532	0.0280482	0.0360365
AKR7A3	0.737831	25.1068	5.08864	3.15683e-21	3.74984e-20
SGK1	86.0713	37.5433	-1.19698	3.34552e-17	2.44587e-16
ACTN2	2.77535	0.413096	-2.74812	1.01696e-29	6.72218e-28
AC073210.1	0.707048	1.67115	1.24096	5.30307e-05	9.83056e-05
HCN2	0.333585	1.71128	2.35895	2.95744e-12	1.24685e-11
RPS7P15	0.103865	0.54144	2.3821	0.00901499	0.0124772
ANKRD36C	0.568491	5.59686	3.29941	4.98732e-07	1.1619e-06
DNAH12	3.09883	0.983742	-1.65537	1.17639e-09	3.67163e-09
CCDC7	0.628204	1.25726	1.00098	0.000271072	0.000460726
AP000873.2	0.838661	2.10153	1.32528	2.35879e-12	1.00475e-11
ECT2	7.19558	34.451	2.25936	3.42972e-28	1.44405e-26
AL513533.1	0.108389	0.392997	1.8583	0.000196886	0.000340684
GSTM5	9.00653	1.5422	-2.54598	2.85388e-31	4.18487e-29
AC016773.1	0.30735	0.939252	1.61163	1.0578e-13	5.21185e-13
NSMF	16.2342	38.2292	1.23564	1.86993e-19	1.79097e-18
BTNL9	43.2618	3.74704	-3.52927	3.23555e-31	4.56109e-29
RNU1-47P	0.463485	1.25099	1.43247	0.000378508	0.000631754
SDHAP3	19.0092	42.5852	1.16366	0.00113498	0.00177858
MRPL20-DT	1.75266	5.58782	1.67274	1.93766e-22	2.68255e-21
NEDD9	137.768	46.4877	-1.56732	5.06386e-24	8.84961e-23
BFSP2-AS1	0.0609148	0.276596	2.18292	1.24443e-08	3.45991e-08
BX005040.1	0.658576	0.118082	-2.47956	2.0514e-13	9.78712e-13
CPHL1P	0.0568204	1.10027	4.2753	8.76414e-15	4.8953e-14
AL122125.1	0.331087	1.20738	1.8666	7.68064e-10	2.44628e-09
ONECUT1	0.00956667	1.25258	7.03267	9.19396e-28	3.41959e-26
VGF	0.114707	8.05291	6.13348	1.26068e-19	1.2296e-18
TTK	0.775569	8.43247	3.44263	1.55128e-29	9.70119e-28
AC092535.4	0.223791	1.35331	2.59627	0.00790198	0.0110162
C20orf144	0.219037	0.812802	1.89173	1.23891e-16	8.50211e-16
MYLK	31.9317	13.7898	-1.21139	7.64014e-21	8.64854e-20
AC244394.1	0.275076	0.135477	-1.02178	6.43077e-05	0.000118001
MYCL-AS1	0.0380296	0.145677	1.93758	7.69112e-05	0.000140001
TMCC1-AS1	0.409083	0.826249	1.01418	2.40528e-09	7.24823e-09
CHI3L1	76.4927	205.038	1.4225	0.00801599	0.0111703
TSNAXIP1	3.22367	1.18988	-1.4379	5.4267e-10	1.75727e-09
IGLV8-61	58.5755	218.733	1.9008	1.39365e-05	2.76681e-05
VWDE	0.481685	2.43634	2.33855	1.56502e-07	3.86447e-07
AC009974.1	3.27281	1.39677	-1.22844	3.22035e-17	2.36181e-16
AC068722.2	1.91828	0.748146	-1.35842	7.42392e-13	3.33019e-12
PPIAP87	0.121963	0.286024	1.22969	0.0011725	0.00183401
ARHGAP11B	0.105017	0.457889	2.12438	1.29111e-16	8.83889e-16
LINC01605	0.264707	1.11504	2.07462	0.000155736	0.000272913
AL807776.1	0.067463	0.180993	1.42377	2.73752e-07	6.57576e-07
AC026412.2	0.237585	1.03373	2.12135	1.86674e-09	5.69872e-09
IGLV3-27	24.1556	128.243	2.40845	1.00306e-06	2.25768e-06
HEY2	6.07352	2.77147	-1.13188	1.96059e-14	1.05094e-13
MMADHCP2	0.110224	0.584971	2.40793	0.0369195	0.0465086
TMLHE-AS1	0.0265722	0.12637	2.24966	2.23867e-08	6.05596e-08
AC016682.1	0.0378889	0.236011	2.63901	0.0176645	0.0233649
ERVFRD-1	1.50223	0.41165	-1.86761	7.09239e-27	2.15175e-25
U62317.3	0.362028	1.18129	1.70619	2.50233e-12	1.06252e-11
PGR-AS1	0.232624	0.0968701	-1.26388	1.27342e-14	6.99036e-14
C1orf220	0.148265	0.752967	2.34441	9.31708e-21	1.04129e-19
ENO1	519.439	1260.43	1.27889	2.44406e-23	3.83755e-22
AL031731.1	0.082513	0.203316	1.30103	0.0129889	0.0175406
TFPI2	17.3316	258.107	3.8965	2.37812e-05	4.58672e-05
PDIA3P2	0.261315	0.575701	1.13953	0.00175455	0.00268245
AF230666.2	0.0757944	0.474658	2.64672	1.10876e-07	2.78638e-07
G6PD	61.6298	158.796	1.36547	0.00241594	0.00362562
PLEKHG4	4.78375	11.078	1.21148	3.61343e-06	7.68625e-06
AC005831.1	3.05201	7.05087	1.20804	0.000132186	0.000233503
SLC15A3	57.7977	22.6526	-1.35134	1.10746e-25	2.54337e-24
AGTR1	8.02862	2.17409	-1.88474	4.93862e-27	1.54802e-25
SYT15	1.39958	0.250304	-2.48324	8.07364e-29	3.97954e-27
MIR4530	1.88969	0.642747	-1.55583	7.68413e-08	1.96473e-07
LINC00479	0.0794685	0.212313	1.41774	0.0100863	0.0138525
CFAP45	15.9351	7.60057	-1.06803	0.000104665	0.000187406
SCAMP5	5.28851	12.1847	1.20413	1.33943e-13	6.51335e-13
NPW	0.393756	12.8744	5.03106	5.53804e-16	3.51851e-15
ATAD3A	11.7323	27.1825	1.21219	2.56634e-22	3.49974e-21
MYCNOS	0.00845185	0.139024	4.03992	1.28997e-07	3.21547e-07
AC004967.2	0.589681	1.59532	1.43584	2.05165e-09	6.22894e-09
SNHG3	7.10406	21.0235	1.56529	2.92463e-19	2.72541e-18
AL032819.2	0.266187	2.38662	3.16446	0.00243896	0.003658
FETUB	0.0047	0.36838	6.29239	5.34591e-10	1.73317e-09
AC004834.1	0.0467759	0.179165	1.93745	2.48291e-14	1.31626e-13
LINC00412	0.334735	0.891621	1.41341	0.00125948	0.001962
AC022497.1	4.75124	2.12789	-1.15888	2.65885e-15	1.56677e-14
PNOC	0.630069	1.72575	1.45364	5.78374e-11	2.10551e-10
ANKRD61	0.746937	2.62547	1.81352	5.72173e-14	2.90412e-13
P4HA3	1.29423	6.11641	2.24059	1.34427e-22	1.90234e-21
NTM	34.3892	7.8744	-2.12671	5.74935e-05	0.000106124
KISS1R	0.0517648	3.94745	6.25281	2.33901e-28	1.02192e-26
BZW2	28.2499	73.105	1.37173	3.18951e-27	1.03406e-25
SPATA18	23.3578	8.06055	-1.53495	1.13945e-13	5.58773e-13
ADA2	71.6314	35.5998	-1.00872	6.26295e-18	4.98905e-17
TMEM158	2.82937	7.85143	1.47247	2.1504e-06	4.68273e-06
IGKV1D-12	2.82881	14.6897	2.37654	8.62495e-09	2.44327e-08
MIR4728	0.665819	2.49542	1.90608	3.27278e-07	7.78965e-07
CCDC170	15.4397	4.83678	-1.67453	9.29901e-13	4.12562e-12
CHST15	20.921	43.4801	1.05541	3.86551e-13	1.78805e-12
MAGEA10-MAGEA5	0.0130278	0.132114	3.34212	8.4518e-07	1.91772e-06
DENND2C	3.29026	1.542	-1.0934	1.30404e-18	1.12067e-17
OR7E91P	0.13562	0.539232	1.99133	0.0050115	0.00718281
TERT	0.0120833	0.642131	5.73178	1.63073e-28	7.44332e-27
AC005622.1	0.182041	0.704366	1.95206	6.39482e-06	1.32031e-05
IGHV3-36	0.0390833	0.417195	3.4161	2.69121e-10	9.04456e-10
AC024361.1	1.28381	3.29518	1.35992	5.21885e-09	1.5168e-08
IQCA1	6.47896	3.07445	-1.07544	1.18202e-12	5.18022e-12
SULT1C2P1	0.129265	0.382243	1.56416	0.00214726	0.00324319
TBX10	0.020713	0.884931	5.41696	7.67468e-14	3.84563e-13
TNFSF12	69.233	29.6851	-1.22172	2.32516e-30	2.11881e-28
RUNX3-AS1	0.126035	0.77088	2.61268	7.89569e-14	3.95172e-13
LINC02433	0.017363	0.270342	3.9607	1.91584e-05	3.73663e-05
EMC9	9.80649	19.6498	1.0027	3.94588e-18	3.2135e-17
B4GALNT3	17.3729	34.8551	1.00453	2.31294e-05	4.4654e-05
RRAS	370.265	139.868	-1.40449	4.79104e-29	2.5574e-27
IL20RA	20.8099	6.23082	-1.73978	1.88849e-21	2.30439e-20
H1-3	0.0939056	10.1165	6.75128	6.80077e-17	4.79474e-16
IGHG3	150.018	977.934	2.7046	5.07868e-16	3.24118e-15
NRAD1	0.357315	0.13597	-1.39391	3.56273e-15	2.07399e-14
AC092868.1	0.449606	6.02129	3.74334	1.04831e-09	3.29038e-09
RHBDL2	1.67782	10.994	2.71205	2.49995e-27	8.33808e-26
AC093248.1	0.106719	0.284725	1.41576	0.0283982	0.0364458
OR5E1P	0.359194	0.089576	-2.00358	5.09164e-28	2.04588e-26
ARRDC4	42.3611	19.2599	-1.13714	8.19999e-24	1.38466e-22
FO393414.3	0.0312222	0.120891	1.95307	0.006703	0.00943267
TBC1D31	1.78044	3.8079	1.09677	4.30721e-14	2.22017e-13
LINC02626	0.0766926	0.226258	1.56081	0.000124012	0.00021981
KCNAB2	14.6711	7.09055	-1.04901	2.69279e-20	2.83794e-19
VIM	572.28	265.125	-1.11005	3.51305e-26	9.07284e-25
FRMD5	0.315857	4.24393	3.74806	2.62484e-27	8.65292e-26
AL590666.5	0.0670667	0.483256	2.84912	0.000300223	0.000507734
AC097468.1	0.248622	0.98165	1.98125	2.73589e-09	8.19321e-09
AC007569.1	0.340111	0.97099	1.51345	1.09188e-10	3.84479e-10
KLHDC8A	0.466754	2.3304	2.31984	5.35728e-12	2.19127e-11
FFAR4	11.3611	2.25684	-2.33172	1.46952e-25	3.2948e-24
PNMA8C	0.576546	0.1201	-2.2632	6.86121e-10	2.19957e-09
AC063960.1	0.347013	1.35716	1.96753	5.59103e-07	1.29616e-06
AL139039.3	0.0615944	0.246939	2.00328	6.70088e-08	1.72491e-07
CCIN	1.49355	0.394921	-1.91911	4.96017e-25	1.00844e-23
AC019193.2	2.2921	0.430959	-2.41105	1.22489e-24	2.35517e-23
SNX18P7	0.131009	0.827788	2.65959	9.48775e-06	1.92157e-05
ST6GALNAC3	5.232	1.36598	-1.93742	1.95851e-27	6.68959e-26
SORD	2.1479	6.04237	1.49219	4.59345e-23	6.94324e-22
RARRES2	272.376	129.982	-1.06729	3.22017e-17	2.36181e-16
ANKRD44-AS1	17.4327	3.96609	-2.13601	3.27221e-14	1.71227e-13
GPR65	8.29648	4.01715	-1.04633	2.90313e-18	2.40498e-17
AP005262.1	0.0542759	0.260442	2.26258	0.0023787	0.00357288
AK4P3	0.0390685	0.29658	2.92434	4.29654e-07	1.00898e-06
AC092954.1	0.376106	0.136988	-1.45709	6.01801e-08	1.55619e-07
CAMP	14.2137	2.37214	-2.58302	1.30835e-27	4.69155e-26
BNIP3P10	0.138087	0.964135	2.80366	2.53596e-12	1.07626e-11
INMT	281.773	23.9839	-3.5544	2.57219e-32	1.02546e-29
ZBTB47	16.7094	7.90139	-1.08048	1.90388e-22	2.63721e-21
LAMB2	175.715	86.1227	-1.02877	2.71867e-19	2.54744e-18
OTUD1	88.1145	20.5882	-2.09756	5.12958e-32	1.61307e-29
MSX2	1.3517	3.54775	1.39213	0.000609017	0.000989057
CLDN3	62.3788	252.477	2.01702	4.42701e-14	2.27549e-13
PODNL1	1.87318	12.8445	2.77759	4.65257e-18	3.76261e-17
PABPC1L	5.63311	24.1693	2.10117	3.19566e-17	2.34505e-16
RPL3P13	2.7172	0.969943	-1.48615	9.84734e-12	3.92586e-11
IGKV2OR2-1	0.490113	2.23482	2.18897	5.79775e-06	1.20366e-05
AP001033.2	1.75796	4.26525	1.27872	3.186e-07	7.59231e-07
ARMC4	4.87138	1.58465	-1.62017	3.74725e-09	1.10559e-08
AL162632.3	0.0502167	0.189317	1.91456	7.69487e-11	2.75751e-10
IGHV1-18	135.628	725.507	2.41933	5.06257e-12	2.07571e-11
ABCB1	6.39085	2.14819	-1.57289	8.67961e-15	4.84914e-14
KIF6	1.30567	0.533611	-1.29093	1.01242e-13	4.99744e-13
NPM1P26	0.479924	1.53835	1.68051	2.99999e-05	5.71699e-05
AC023908.3	0.275598	0.665725	1.27236	1.52735e-09	4.70376e-09
MAGEC3	0.0271259	0.37698	3.79674	0.000149141	0.00026184
AC010275.1	0.0314111	1.28237	5.35139	6.1641e-09	1.77394e-08
TPRG1	4.24157	1.53475	-1.4666	6.77094e-26	1.64065e-24
AL353747.3	1.85153	0.671934	-1.46233	2.41383e-08	6.50838e-08
KCNN4	5.91362	56.2514	3.24978	4.32753e-21	5.05571e-20
CD1A	5.55446	19.4635	1.80905	0.00933348	0.0128859
AL031123.3	0.362822	1.03958	1.51866	3.36573e-11	1.25979e-10
IGHV3-63	2.06316	6.68754	1.69662	7.90017e-09	2.24669e-08
AC008403.3	0.0515463	0.183379	1.83089	5.78107e-12	2.35517e-11
AC002116.2	0.494581	1.18684	1.26284	2.36615e-12	1.00772e-11
AC124248.2	0.0571963	0.193561	1.7588	2.91525e-10	9.75252e-10
AC006330.1	0.471722	1.10485	1.22785	0.0171515	0.0227407
IGHV4-39	126.389	675.251	2.41755	1.66363e-12	7.20303e-12
LINC00637	0.0761593	0.187451	1.29942	9.32587e-06	1.89074e-05
LINC02600	0.849459	0.351832	-1.27166	2.36661e-21	2.85504e-20
ZNF670-ZNF695	0.00832778	0.134363	4.01206	3.60299e-14	1.87345e-13
NMUR2	0.929639	0.411807	-1.1747	4.91469e-12	2.01897e-11
CCDC58	12.9639	26.4037	1.02623	2.7534e-21	3.29363e-20
IGHV3-49	49.8678	241.006	2.27289	1.48977e-09	4.59409e-09
SOX12	10.0106	26.0387	1.37913	1.79773e-17	1.35108e-16
ZG16B	1.63071	8.92831	2.45289	0.000112212	0.000200077
AC021028.1	0.542919	1.17064	1.10849	1.1526e-05	2.31364e-05
AC138904.1	0.117135	1.0488	3.16249	3.41262e-20	3.55545e-19
ARL4AP5	0.186296	0.540152	1.53577	3.21626e-05	6.10906e-05
ITLN2	57.4035	2.29373	-4.64537	2.01256e-32	9.64902e-30
AC008278.2	0.888763	0.254667	-1.80318	1.19749e-07	2.99608e-07
SLC5A4-AS1	0.114391	0.302516	1.40304	0.00105627	0.0016627
ANKS1A	48.1935	23.2597	-1.051	3.6809e-21	4.34203e-20
RBP4	63.4068	15.9959	-1.98693	1.30011e-25	2.93043e-24
IGKV1OR1-1	0.126376	0.825837	2.70813	5.66086e-09	1.63742e-08
AP003385.4	0.44408	0.0763034	-2.541	1.35919e-28	6.32841e-27
IGHM	769.189	1816.81	1.23999	5.07035e-08	1.32077e-07
NR4A1	163.932	49.6219	-1.72405	1.34058e-15	8.19083e-15
CBLC	4.48518	41.6176	3.21396	2.2021e-27	7.43207e-26
AP005435.1	0.04595	1.05024	4.5145	3.96722e-13	1.8321e-12
AC007240.3	0.26377	1.51328	2.52033	3.35545e-25	7.04066e-24
UTP25	5.41407	11.5481	1.09287	1.2693e-22	1.80124e-21
AC012157.2	0.188576	0.416032	1.14155	0.0167571	0.0222466
FGF14-AS2	10.0633	3.38392	-1.57234	5.81719e-26	1.42717e-24
MIR6797	1.09738	3.50214	1.67417	3.62346e-10	1.20053e-09
AC090796.1	1.91667	0.302258	-2.66475	4.45244e-23	6.73808e-22
FLACC1	2.73649	0.997844	-1.45544	1.74057e-10	5.97318e-10
MYO7A	1.45387	5.82768	2.00302	7.16726e-26	1.72684e-24
PTCSC2	0.0391148	0.209259	2.4195	5.31139e-08	1.38103e-07
NAALADL2	2.03289	4.84823	1.25392	7.9683e-07	1.8135e-06
RASL12	44.5178	14.5271	-1.61564	1.04976e-26	3.0576e-25
MATN3	25.5505	8.92079	-1.51811	6.54268e-20	6.58266e-19
KRT86	1.28088	4.1608	1.69972	6.39645e-10	2.05964e-09
PPIAP40	0.371548	1.16875	1.65334	5.86394e-08	1.51789e-07
AC019226.1	0.623691	1.89631	1.60429	0.0107268	0.014676
CSF3R	52.2614	24.4804	-1.09412	1.48299e-16	1.00466e-15
LINC00968	8.38644	0.719296	-3.5434	2.38719e-32	9.98509e-30
TPO	0.102778	0.265422	1.36876	0.000360222	0.00060289
IL6	77.26	10.65	-2.85886	5.90019e-14	2.99112e-13
AL355803.1	5.45871	2.45424	-1.15328	1.74971e-13	8.40591e-13
AC118553.2	0.0794815	0.186432	1.22996	0.00032596	0.000548823
PMP22	48.3079	21.3968	-1.17486	6.50336e-25	1.30042e-23
OR7E102P	0.339207	1.03223	1.60552	0.000354678	0.000594079
FAM86HP	2.06638	4.60483	1.15604	7.41981e-12	2.99457e-11
TMEM47	54.3339	15.9084	-1.77206	1.86886e-26	5.13835e-25
CBY2	0.0272056	0.960658	5.14205	1.3075e-11	5.13639e-11
AGTR2	45.4458	8.56199	-2.40813	7.5101e-25	1.48774e-23
CDHR2	0.172741	2.39234	3.79174	3.21193e-13	1.49797e-12
APOL5	0.0278833	0.11159	2.00073	0.00774617	0.010815
C1QB	1550.89	537.096	-1.52985	1.6556e-24	3.11066e-23
TBX4	36.8958	8.00326	-2.2048	7.23498e-29	3.63387e-27
FMO1	1.35639	3.2692	1.26917	8.49048e-08	2.15836e-07
DRP2	0.0543019	0.544509	3.32588	3.00058e-20	3.14063e-19
SLC29A4	1.92973	16.9867	3.13794	1.66857e-18	1.41959e-17
CBX2	2.10534	11.1721	2.40778	5.28233e-17	3.77849e-16
TFPI2-DT	0.154889	1.96558	3.66565	1.07263e-13	5.2814e-13
AL583785.1	0.260096	0.123255	-1.0774	2.56438e-07	6.17908e-07
ART1	0.496422	0.163155	-1.60532	2.72512e-15	1.60321e-14
AL512604.2	0.0321241	0.118579	1.88412	2.66559e-06	5.74769e-06
CRY2	56.9355	25.7095	-1.14702	5.8691e-23	8.74709e-22
MTURN	44.3666	18.2378	-1.28254	1.37363e-23	2.22953e-22
PACRG	7.21064	1.58388	-2.18667	3.53254e-18	2.90003e-17
CMA1	2.59398	0.680887	-1.92968	7.03079e-15	3.96794e-14
MIR4730	0.631365	1.43239	1.18188	1.42281e-05	2.8201e-05
IGHV3OR16-15	0.727757	1.66821	1.19677	1.44607e-10	5.01243e-10
AL353807.2	0.194239	0.976983	2.3305	7.7765e-14	3.89436e-13
AL117344.2	0.175406	0.435573	1.31222	6.7585e-08	1.73886e-07
GIMAP5	2.14137	0.907628	-1.23836	2.12171e-16	1.40831e-15
AC105235.1	0.243067	0.76145	1.6474	0.0228851	0.0297899
RN7SL481P	0.893054	2.30099	1.36544	0.000613233	0.000995524
LINC00621	0.0604056	0.191483	1.66447	9.48764e-06	1.92157e-05
AC009127.1	0.098813	0.238584	1.27173	0.00599442	0.00849567
NRAP	0.0916185	0.280691	1.61527	0.0105326	0.0144243
AC104561.1	0.177107	0.455339	1.36232	3.40155e-08	9.02831e-08
GAS1RR	0.809739	0.298306	-1.44067	5.68055e-22	7.42198e-21
CADM4	18.8762	38.67	1.03465	4.9695e-08	1.29609e-07
AC006557.1	0.131848	0.280212	1.08764	0.000489682	0.000805508
AC024592.2	0.0684093	0.454636	2.73245	1.37184e-12	5.98128e-12
ZNF300	2.0492	4.78189	1.22252	0.000478041	0.000786968
NKG7	90.5045	41.6082	-1.12112	4.74099e-14	2.43051e-13
JPT2	51.2182	113.536	1.14841	8.42625e-24	1.42005e-22
CDH3	9.34554	71.6951	2.93952	4.91484e-18	3.95715e-17
ANGPTL1	12.9991	2.86751	-2.18053	3.94001e-28	1.62933e-26
RPL3L	0.0922426	0.351492	1.92999	2.657e-13	1.25242e-12
AC069499.1	0.670219	1.67837	1.32436	3.81682e-09	1.12507e-08
TNFSF13	38.5858	18.2653	-1.07897	1.15007e-25	2.62235e-24
CCDC78	11.9352	5.10426	-1.22544	0.000514448	0.000844343
SATB2	0.834546	2.20481	1.40159	9.04517e-10	2.85628e-09
PABPN1P1	0.653867	1.70802	1.38526	9.91901e-06	2.0051e-05
IGHV1OR21-1	0.751015	5.88329	2.96971	1.10457e-12	4.86082e-12
FAM201B	0.0547907	0.275129	2.3281	7.08353e-10	2.266e-09
AC093585.1	0.298346	0.858101	1.52416	0.0123338	0.0167188
LSMEM2	0.361231	0.158211	-1.19108	1.9575e-10	6.67721e-10
AL928654.3	0.1918	0.0909006	-1.07724	2.18086e-05	4.22382e-05
CRACD	1.12048	2.94083	1.3921	3.03871e-07	7.25488e-07
AC079336.1	0.0897852	0.234975	1.38796	0.0207494	0.0271749
CFAP74	2.56859	0.859171	-1.57996	9.56787e-09	2.69158e-08
SEMA6A	15.4594	2.63208	-2.55421	6.16093e-29	3.17568e-27
AATK	12.5109	4.47611	-1.48287	4.83346e-21	5.60826e-20
AC078778.1	0.318741	1.03378	1.69747	6.06969e-06	1.25627e-05
AC068025.1	0.155826	0.71601	2.20004	1.94668e-14	1.04431e-13
AC246787.2	0.23982	1.03533	2.11007	5.48544e-09	1.59011e-08
SNHG17	3.30094	6.68345	1.01772	4.27778e-14	2.20545e-13
IGKJ3	3.70325	28.0441	2.92083	3.46425e-15	2.02081e-14
AC018529.1	3.71487	0.685614	-2.43784	1.01433e-23	1.68823e-22
LINC00519	0.195172	1.1554	2.56557	1.37733e-16	9.37884e-16
OR7E7P	1.20834	2.60394	1.10768	6.33138e-06	1.30827e-05
AP003119.2	0.787704	2.93892	1.89956	7.22415e-11	2.59721e-10
HMGA2-AS1	0.0445444	0.624714	3.80988	2.39422e-16	1.5822e-15
AC080080.1	0.40542	1.02448	1.3374	3.51181e-09	1.04046e-08
AC016987.2	0.491544	0.0901661	-2.44667	1.13688e-16	7.82719e-16
FKBP10	32.9783	115.494	1.80823	2.79432e-13	1.31375e-12
SCN2B	3.17986	0.873722	-1.86372	3.19169e-24	5.73897e-23
LINC02228	0.02075	0.36822	4.14938	0.000203315	0.000351082
KRT18P31	0.138611	0.441531	1.67147	0.0292355	0.0374601
AC244093.2	0.0801981	0.306493	1.93421	0.00362629	0.00530259
HES6	5.75071	41.5883	2.85437	3.41138e-19	3.15482e-18
RPL11P1	0.109233	0.294762	1.43214	0.000898362	0.00142725
LINC02562	2.33757	10.8811	2.21875	6.84115e-11	2.46612e-10
AC113618.2	0.298535	0.13187	-1.17879	2.16608e-13	1.0315e-12
GPR18	1.44939	2.90159	1.0014	0.00740209	0.0103624
DNAH14	0.48815	2.2274	2.18996	1.87998e-28	8.4599e-27
VWFP1	1.73251	0.372532	-2.21743	3.60672e-14	1.87501e-13
MIR3131	1.54863	0.757831	-1.03105	7.08651e-13	3.18949e-12
AC245041.1	13.776	3.07645	-2.16282	1.46892e-22	2.07298e-21
LGALS8-AS1	0.260994	0.568216	1.12242	2.95907e-05	5.64111e-05
AC027307.1	0.129941	0.318458	1.29325	0.000245302	0.000419412
AC007365.1	0.467626	1.0606	1.18146	0.00883872	0.0122477
RAB15	15.5512	41.8475	1.42811	4.55049e-11	1.67758e-10
PIP5K1B	25.2579	5.12549	-2.30097	1.93128e-30	1.79841e-28
SLC15A2	44.578	14.9163	-1.57944	4.01454e-26	1.02431e-24
RLN3	0.0966481	0.568401	2.5561	7.98663e-07	1.81751e-06
ASAH2B	1.25438	2.69137	1.10137	4.142e-19	3.78523e-18
IL21	0.103602	0.359115	1.79339	4.15527e-11	1.54057e-10
SOX11	0.0644537	2.19274	5.08833	4.98914e-10	1.62453e-09
IGLV2-11	145.211	543.295	1.90359	5.02659e-09	1.46275e-08
DUS1L	26.6463	61.1046	1.19734	5.3974e-24	9.41316e-23
SLC25A5P1	0.201763	0.618432	1.61595	1.90668e-11	7.34323e-11
ITLN1	272.936	78.6689	-1.7947	2.5226e-24	4.60402e-23
AC008883.3	0.0610333	0.371615	2.60614	1.01286e-05	2.04552e-05
AC090695.1	0.2792	0.68044	1.28517	0.00107747	0.00169389
SNORD6	6.49542	14.0843	1.11659	5.54153e-06	1.15303e-05
NMUR1	7.29811	1.10973	-2.71732	1.16367e-30	1.17822e-28
MST1	1.3996	3.28836	1.23235	1.30758e-08	3.62798e-08
PLPP5	21.1848	46.2736	1.12716	9.12349e-21	1.02099e-19
CBS	0.239819	0.615515	1.35985	0.00188166	0.0028634
ZMYND10	33.9991	7.95402	-2.09574	2.42753e-12	1.03214e-11
LYPLA1P3	0.260556	0.644254	1.30604	0.000259841	0.000442993
AC024940.1	0.0764778	0.468558	2.61511	6.89633e-11	2.48496e-10
METTL1	12.6397	33.4418	1.40369	1.52594e-25	3.40335e-24
COLGALT2	3.85331	1.41779	-1.44246	1.44351e-23	2.33998e-22
AC109446.2	0.187006	0.858328	2.19845	9.97835e-05	0.000179017
MT2P1	11.0136	5.04832	-1.12541	6.28378e-06	1.29917e-05
AC073569.2	0.126052	0.417238	1.72685	0.000255891	0.000436435
SLC7A10	0.123659	3.68766	4.89826	2.4909e-10	8.40122e-10
AL050320.1	0.179156	0.451006	1.33193	0.00761813	0.0106461
AC138776.1	0.566402	0.137712	-2.04017	1.2825e-19	1.24849e-18
MCM2	5.12736	22.0599	2.10514	1.63928e-22	2.29436e-21
BNIP3P27	0.384217	1.6776	2.12641	0.000803677	0.00128394
AC117503.5	0.0335074	0.260407	2.95822	0.00753696	0.0105425
AL161618.1	3.92922	0.69003	-2.50951	1.04384e-14	5.78991e-14
AC010894.1	1.18592	2.65664	1.16359	1.28242e-09	3.98355e-09
ARL2BPP4	0.156504	1.35694	3.11609	1.96733e-09	5.97934e-09
SP5	1.87854	9.26795	2.30264	1.9044e-06	4.16801e-06
MZT1P2	0.193641	0.430904	1.15398	0.00122881	0.00191609
ALG1L15P	0.0997148	0.206515	1.05037	0.000357792	0.000598942
IGKV6D-21	4.75221	20.2078	2.08824	5.32542e-06	1.11066e-05
PFKP	13.856	61.8746	2.15884	1.77447e-22	2.47003e-21
NPSR1-AS1	0.00190741	0.193474	6.66438	4.64702e-22	6.14452e-21
LINC00987	2.37605	0.715396	-1.73175	1.00035e-26	2.93378e-25
NMBR	0.232204	0.0924824	-1.32814	1.13289e-13	5.55665e-13
MPIG6B	2.16189	0.469178	-2.20409	1.20106e-26	3.45556e-25
HGH1	19.2827	42.7526	1.1487	2.61564e-21	3.13914e-20
AC026355.2	1.05102	4.50973	2.10125	2.58935e-05	4.97306e-05
ADPRHL1	1.0481	2.789	1.41198	9.40726e-10	2.96402e-09
C2CD4D	0.644515	3.6672	2.50839	7.8007e-24	1.32074e-22
SNORA5A	1.19336	6.4763	2.44014	2.01082e-07	4.90544e-07
NEK5	4.47246	1.45322	-1.62182	7.87288e-12	3.1714e-11
SOD1P3	0.125152	0.355849	1.50759	8.11076e-05	0.000147114
PPP1R14D	0.913061	54.6529	5.90344	1.70192e-24	3.18829e-23
LRRC37A14P	1.39532	0.379267	-1.87931	1.64649e-22	2.30319e-21
IGHV3OR16-9	1.76613	8.77331	2.31253	5.84433e-11	2.12661e-10
ACAD8	11.183	28.8536	1.36744	7.04948e-15	3.97673e-14
ADAM28	2.76719	12.735	2.2023	2.12045e-21	2.56657e-20
AL132857.1	2.18508	5.69648	1.38238	3.32647e-09	9.87492e-09
AC091178.2	0.333083	1.19348	1.84122	5.18849e-12	2.12563e-11
PVT1	0.364402	2.98022	3.03182	9.86366e-30	6.55394e-28
RN7SL313P	0.00670926	0.382137	5.83179	1.05156e-11	4.1792e-11
ETV5	60.8895	28.5132	-1.09457	1.73613e-18	1.47559e-17
ALOX12P2	0.53947	2.09922	1.96024	2.93719e-05	5.60191e-05
TMEM61	1.44504	3.55323	1.29802	3.52934e-05	6.67276e-05
CRB3P1	0.764165	0.153593	-2.31477	2.49024e-19	2.34546e-18
TBC1D2	103.692	49.7473	-1.05961	5.82626e-21	6.67821e-20
AC120036.4	0.305	1.574	2.36755	2.39787e-13	1.13615e-12
PLK5	0.0128259	0.174437	3.76557	2.82435e-11	1.06618e-10
AC117498.2	0.187096	0.469043	1.32594	0.000690429	0.00111235
FANCB	0.427306	1.61479	1.918	6.50025e-22	8.39341e-21
AC048383.1	0.0466111	0.330305	2.82505	1.8184e-05	3.55447e-05
MIR6728	0.602372	1.25634	1.0605	0.000588268	0.00095737
H2BC17	0.156293	4.77802	4.93409	8.06755e-18	6.3356e-17
AL033397.1	0.0920667	4.81502	5.70872	1.95127e-06	4.26452e-06
HMGB1P24	0.20093	0.442848	1.14012	8.82939e-05	0.000159413
CIT	3.93917	16.6994	2.08384	2.14081e-08	5.80475e-08
PSORS1C2	0.375476	0.939155	1.32264	0.0276862	0.0356092
GNGT2	9.30699	4.41851	-1.07475	7.02704e-24	1.20171e-22
CCDC181	3.71577	1.62187	-1.196	8.7738e-11	3.12703e-10
AC113410.3	0.432359	1.13498	1.39236	0.000621724	0.00100854
HBA2	511.148	27.8315	-4.19895	4.33459e-31	5.76034e-29
OR10AH1P	0.0245704	0.109277	2.153	0.000263279	0.000448376
P3H2	72.2128	19.3509	-1.89985	4.41558e-26	1.11328e-24
DARS-AS1	0.279283	1.1352	2.02314	3.99622e-29	2.17406e-27
C1QBPP2	0.0905889	0.585722	2.69281	1.80364e-09	5.51731e-09
AC072062.1	0.0174833	0.143655	3.03855	5.3775e-09	1.56041e-08
AC092128.1	0.145519	0.992696	2.77015	0.00017792	0.000309513
SPRR1A	1.27238	14.1419	3.47438	0.000223025	0.000383327
MESTP1	0.119007	0.348258	1.54911	0.00103453	0.00163079
CES1P1	1.98391	0.884724	-1.16505	5.09886e-13	2.33066e-12
SINHCAFP1	0.155876	0.401593	1.36533	0.000413605	0.000686919
LINC00535	0.719537	0.274469	-1.39042	5.47482e-21	6.29802e-20
ARHGEF15	33.7036	5.94107	-2.50411	3.82435e-31	5.21809e-29
GFRA1	5.94917	1.78214	-1.73908	5.97637e-21	6.83492e-20
PIGAP1	0.0459204	0.259233	2.49704	0.0312235	0.0398214
CCDC162P	0.275343	1.50604	2.45146	5.36917e-05	9.94876e-05
AC091390.1	0.305904	0.854079	1.48129	2.28349e-10	7.73439e-10
AC068228.3	0.20012	0.435946	1.12328	0.0261136	0.0337037
AL590729.1	0.322485	0.832339	1.36794	3.67988e-06	7.81848e-06
KCNQ2	0.0117889	0.524974	5.47675	2.20784e-05	4.2738e-05
LINC01511	0.0409037	1.18195	4.85279	9.70016e-08	2.45073e-07
SDHAF3	22.5351	45.5587	1.01555	2.9726e-18	2.46014e-17
NDRG2	49.6384	17.4388	-1.50915	3.22399e-26	8.41966e-25
SERPINH1P1	0.0596481	0.174337	1.54733	1.39806e-07	3.47099e-07
AL513523.1	0.231185	0.921483	1.99491	2.50813e-08	6.74696e-08
AC243830.2	0.25183	0.873786	1.79483	1.01344e-09	3.18485e-09
FERMT3	81.794	40.4748	-1.01497	1.95541e-18	1.65261e-17
CHST4	0.650198	2.84057	2.12723	0.0232339	0.030224
RNA5SP296	1.10679	0.521539	-1.08553	2.79298e-06	6.00918e-06
TTLL2	0.143313	0.360969	1.33271	0.0137308	0.0184828
AC009275.1	0.109691	0.548345	2.32164	3.60628e-08	9.53811e-08
RNASEH2A	0.0532407	0.148549	1.48034	3.62943e-08	9.59836e-08
EME1	0.486713	3.35116	2.78352	4.94676e-28	1.99395e-26
PLEKHA6	6.62964	20.1153	1.60129	8.11785e-15	4.55625e-14
AL136171.2	0.0115111	0.237235	4.36522	0.000382003	0.000637379
DUXAP10	0.0769315	0.419567	2.44725	4.48425e-10	1.46878e-09
AL137009.1	4.12438	1.37924	-1.5803	1.62978e-25	3.62245e-24
HASPIN	0.7852	3.19203	2.02334	1.4255e-20	1.54971e-19
SSR4	90.7471	224.227	1.30503	3.26636e-24	5.85673e-23
PDZRN4	1.14605	0.569903	-1.00788	1.64888e-20	1.77967e-19
IGLV3-10	70.146	371.888	2.40644	5.50612e-09	1.59574e-08
AC005162.1	0.075663	0.373646	2.30401	0.0186898	0.0246203
AC008119.1	0.3215	0.76042	1.24198	0.00154854	0.00238406
C1orf141	0.970778	0.243479	-1.99534	1.78397e-10	6.11392e-10
LINC01876	0.460767	2.43007	2.39889	1.32313e-07	3.29395e-07
APELA	0.218817	0.95323	2.1231	0.00023103	0.000396204
CFAP52	12.4712	2.58381	-2.27103	2.96369e-11	1.11632e-10
SCGB1A1	2222.82	204.806	-3.44006	1.86954e-20	2.00933e-19
WNT9A	18.8249	7.80432	-1.2703	3.00092e-20	3.14063e-19
AC005865.1	0.0594333	0.54901	3.20749	2.4898e-10	8.39863e-10
WDR11-AS1	0.314661	0.144081	-1.12692	4.81018e-19	4.35373e-18
SIX1	3.41046	18.381	2.43018	6.28837e-17	4.45688e-16
ANKRD33B	4.51418	1.4796	-1.60926	3.76387e-24	6.71106e-23
SNORA3B	2.73244	6.31654	1.20895	0.00195375	0.00296584
LINC01537	0.982846	0.335621	-1.55013	4.96796e-24	8.69394e-23
HOTAIR	0.00897778	1.21545	7.08091	1.15671e-10	4.05907e-10
KIF3C	5.03284	11.3437	1.17245	1.05929e-05	2.1344e-05
SFTPD	661.367	140.687	-2.23296	1.74168e-27	6.03789e-26
Z69666.1	0.320181	0.710421	1.14978	0.00449059	0.00648062
LINC01629	0.0840019	0.999438	3.57262	2.81026e-06	6.04431e-06
PLAGL1	14.4196	6.48984	-1.15178	4.95982e-20	5.06807e-19
TH2LCRR	0.347631	0.896887	1.36737	0.00667995	0.00940457
HOXA11-AS	0.00312778	0.133593	5.41656	9.34858e-09	2.63277e-08
CEMIP	7.51826	31.6487	2.07367	2.02798e-08	5.51229e-08
SNORD14E	2.44379	11.5518	2.24093	9.67872e-13	4.28737e-12
AC108727.1	0.793696	2.01338	1.34296	0.0223773	0.0291766
SIGLEC11	3.71698	0.719036	-2.37	2.09675e-27	7.09519e-26
TRAP1	13.0064	29.8442	1.19823	2.5634e-26	6.8559e-25
PKP3	25.0363	74.35	1.57031	3.39624e-22	4.556e-21
AC024884.2	0.0967352	0.263163	1.44384	3.71728e-06	7.89335e-06
ZMYND19	13.2711	26.7816	1.01295	2.25427e-23	3.56147e-22
AL158847.1	0.608131	0.135183	-2.16947	1.97213e-24	3.65955e-23
AC061975.6	0.00622407	1.14702	7.52581	3.40524e-13	1.58549e-12
THEGL	0.0325185	0.284007	3.12659	8.80135e-13	3.9164e-12
AC022613.2	3.08614	1.04662	-1.56006	7.63581e-28	2.92974e-26
AC148476.1	0.345056	1.22877	1.83231	1.4329e-05	2.83854e-05
LINC00894	0.703467	1.49066	1.0834	0.000919276	0.00145857
LINC01213	0.0217389	0.560301	4.68785	1.87326e-11	7.2178e-11
AP001885.2	0.101148	0.306428	1.59908	1.52366e-09	4.6935e-09
LINC00920	3.9232	1.9154	-1.03439	1.99902e-16	1.32965e-15
EIF3KP1	0.957152	0.43504	-1.1376	3.96289e-12	1.64465e-11
GRHL3-AS1	0.0621407	0.427563	2.78253	1.06703e-13	5.25584e-13
CT83	0.272463	26.0054	6.57661	7.41763e-07	1.69406e-06
PPIL1	37.8683	79.9963	1.07894	7.20084e-21	8.16575e-20
LINC01985	0.679335	0.113197	-2.58529	1.70005e-25	3.76861e-24
AL161662.1	0.0617148	0.196404	1.67014	0.0237336	0.0308363
AL670729.2	0.111835	0.263289	1.23527	0.000159553	0.000279314
AC007277.1	0.67738	0.214397	-1.65968	1.05452e-17	8.141e-17
AP003064.2	1.24045	0.356266	-1.79984	1.90778e-13	9.12237e-13
SLAMF9	0.850272	3.431	2.01263	1.69186e-09	5.18788e-09
AC002059.1	0.645072	1.34561	1.06073	0.000330923	0.000556629
EGOT	0.28967	1.90119	2.71442	3.04214e-07	7.26236e-07
AC084740.1	0.044237	0.1454	1.7167	0.0177568	0.0234815
CLDN10-AS1	0.0714463	6.92634	6.59909	4.02825e-17	2.92157e-16
AC098935.2	0.310561	0.821099	1.40268	0.0114727	0.0156328
ABCC13	0.469483	0.115872	-2.01854	2.18824e-24	4.03126e-23
RN7SL477P	0.216376	0.524451	1.27727	0.00324383	0.0047781
SLIT3	34.2121	6.0717	-2.49433	1.7612e-29	1.06993e-27
AC132186.1	0.0231056	0.614941	4.73414	2.62982e-09	7.89038e-09
THSD1	18.6618	3.87322	-2.26848	2.09257e-29	1.23307e-27
CDKN2A	1.55194	18.7473	3.59454	9.23878e-13	4.10175e-12
AC243960.3	2.90936	0.956117	-1.60544	1.99556e-19	1.9013e-18
SLC2A5	0.913902	4.95316	2.43824	2.9916e-22	4.05367e-21
IGLV2-33	0.424467	2.66982	2.65302	9.38694e-10	2.95798e-09
TMEM59L	1.78597	32.4292	4.18251	6.28774e-08	1.62364e-07
C1orf147	0.143109	0.573448	2.00254	3.39178e-14	1.77085e-13
LINC01816	1.4749	4.02558	1.44858	3.17644e-09	9.45703e-09
AC006273.1	3.72728	0.599193	-2.63703	1.82738e-29	1.10487e-27
AL121845.4	0.748944	1.54808	1.04755	0.000134935	0.00023803
PPM1N	1.37014	2.93685	1.09995	0.000554343	0.000905684
HDHD3	21.2049	47.9514	1.17718	5.29917e-22	6.95874e-21
GPR88	0.195924	0.626931	1.67801	1.0569e-07	2.66031e-07
IRAK1	65.8337	155.7	1.24187	2.42222e-23	3.80794e-22
PER1	112.722	49.3301	-1.19223	1.19372e-15	7.33036e-15
CDH19	1.55117	0.341585	-2.18304	4.34817e-27	1.38506e-25
SRGN	887.688	432.437	-1.03756	3.88276e-19	3.56362e-18
FAM86LP	0.0664296	0.504925	2.92617	3.64083e-11	1.35852e-10
ZEB1	24.1168	9.33042	-1.37002	1.30118e-23	2.1241e-22
MIR6835	0.737044	3.97865	2.43246	1.05644e-13	5.2077e-13
AL356489.2	0.578685	0.226984	-1.35019	1.66263e-18	1.41501e-17
C18orf63	0.368189	0.0948493	-1.95674	3.31674e-20	3.46121e-19
TMEM89	0.152619	0.353502	1.21179	0.000820272	0.00130875
SGMS2	73.8651	30.3394	-1.2837	2.563e-13	1.209e-12
LINC01748	0.02065	0.562489	4.76761	3.96759e-10	1.30893e-09
APCDD1L	0.105174	1.98582	4.23889	9.45836e-18	7.35838e-17
SEPTIN10P1	1.03971	0.371069	-1.48642	7.18645e-19	6.35572e-18
NECAB2	0.242046	1.40156	2.53368	0.00297037	0.00439815
SFXN1	7.63156	22.6442	1.56909	1.39831e-31	2.73608e-29
PSAT1	3.78311	45.6135	3.59182	9.20355e-29	4.44751e-27
H2AC9P	0.0514889	2.36304	5.52024	2.50198e-13	1.18197e-12
CHRNB4	0.0441648	0.474533	3.42554	2.51706e-21	3.02938e-20
AC007271.1	0.0678	0.204212	1.59071	0.000239689	0.000410393
ANO9	6.67962	20.3263	1.60551	5.74188e-15	3.27384e-14
SGCA	22.571	5.38938	-2.06628	2.81244e-28	1.20807e-26
SSTR5-AS1	0.00615	0.291925	5.56887	7.46833e-06	1.53154e-05
MT1H	1.23108	4.20756	1.77306	1.46199e-05	2.89347e-05
SMPDL3B	13.8313	52.0053	1.91073	2.14928e-20	2.29356e-19
CHST9	5.24376	1.75272	-1.581	1.89371e-10	6.46871e-10
MSH2	5.2101	10.4913	1.00981	1.19402e-17	9.16808e-17
AL359091.2	0.0579593	0.155438	1.42323	0.0161185	0.0214647
ARHGEF26	63.3075	10.1887	-2.6354	3.37373e-31	4.70387e-29
MYL9	607.954	182.627	-1.73506	1.62036e-30	1.53124e-28
UCN	1.7466	4.53316	1.37597	1.80062e-08	4.92581e-08
HOXA10	0.117804	2.1025	4.15765	7.89327e-08	2.01558e-07
PTPRM	47.4963	18.0044	-1.39946	5.20422e-24	9.08868e-23
EGLN3	3.93054	31.1384	2.9859	2.72561e-18	2.26675e-17
AC022210.1	0.498422	1.68707	1.75908	6.90634e-19	6.1271e-18
THEM5	5.47631	19.6604	1.84402	2.20601e-15	1.31541e-14
CARMIL3	0.467569	1.21085	1.37277	0.00043591	0.000720912
TWNK	5.15456	12.5274	1.28117	2.04016e-21	2.47408e-20
PRR29	7.87046	3.48735	-1.17432	1.40398e-13	6.8078e-13
VN1R42P	0.586085	1.42838	1.2852	5.52185e-09	1.60011e-08
PPP1R15A	325.314	91.0236	-1.83752	4.15956e-25	8.55896e-24
LRAT	0.599639	2.50155	2.06066	3.77769e-05	7.1177e-05
CHRD	2.60758	6.43641	1.30354	0.0144107	0.0193338
SH2D1B	3.27031	0.93714	-1.80309	7.79979e-23	1.14179e-21
UGDH	38.6627	148.697	1.94336	1.45774e-18	1.24604e-17
POU6F2-AS2	0.0141148	2.29624	7.34592	3.69066e-10	1.22168e-09
AC015813.4	0.176857	0.8417	2.25072	5.15081e-07	1.19813e-06
AP004372.1	0.273596	0.0975479	-1.48787	1.10516e-10	3.88993e-10
AC103740.2	0.0201426	0.334677	4.05445	5.11026e-14	2.60725e-13
AL049539.1	0.100019	1.35393	3.75881	1.4702e-15	8.94209e-15
SNX22	10.8702	2.23426	-2.28251	1.38017e-29	8.73834e-28
IGDCC4	0.73598	1.70601	1.21289	6.96334e-09	1.9936e-08
TMEM178A	10.162	4.384	-1.21286	2.04409e-20	2.19047e-19
AC004253.1	1.52788	3.19857	1.06589	3.57656e-07	8.47395e-07
AC011773.4	0.0964296	0.280505	1.54048	5.42496e-06	1.13031e-05
FAM43A	23.2011	10.1175	-1.19734	1.05825e-16	7.30554e-16
PNMT	5.29017	2.34129	-1.17601	3.86833e-12	1.60855e-11
TMEM236	2.52024	1.17813	-1.09705	1.48358e-15	9.01706e-15
AL135838.1	0.0600796	0.311393	2.37379	0.00647604	0.0091316
UTRN	69.1698	27.7407	-1.31814	1.44965e-20	1.57462e-19
Z98885.3	0.367487	0.794912	1.1131	0.0223229	0.0291072
CYP3A7	0.461661	0.106315	-2.11849	1.11899e-24	2.16624e-23
GPIHBP1	81.9404	5.88261	-3.80005	6.07644e-32	1.64933e-29
RPS7P14	0.479335	0.966682	1.01201	1.1143e-06	2.49762e-06
GALR3	0.0141426	0.155493	3.45873	1.82772e-06	4.00879e-06
LINC01781	0.694839	1.54627	1.15404	5.46645e-07	1.26843e-06
GRAMD2A	35.5775	14.8447	-1.26102	1.19479e-20	1.31742e-19
C14orf39	0.0635093	0.390121	2.61888	1.89388e-08	5.16706e-08
SATB2-AS1	0.0581259	0.530158	3.18917	4.02477e-21	4.72582e-20
Z98745.2	2.79228	0.970149	-1.52516	6.26994e-21	7.15463e-20
MS4A15	124.595	33.7939	-1.88241	1.13346e-24	2.18927e-23
AQP4	372.091	47.2957	-2.97587	1.60884e-32	9.19852e-30
ROR1	16.791	4.87839	-1.78321	1.18852e-27	4.31983e-26
IGHV3-38	1.80234	4.33805	1.26717	2.111e-08	5.72697e-08
AC009501.2	0.109039	0.755797	2.79316	6.14816e-10	1.98169e-09
CFP	0.917052	0.271076	-1.75831	1.34174e-26	3.79961e-25
TUBA4A	38.843	80.109	1.04431	9.09126e-11	3.23475e-10
FOXB1	0.049963	1.44152	4.85059	5.23525e-11	1.91619e-10
CLEC3B	199.264	13.8262	-3.8492	6.00304e-33	6.03467e-30
IGHV3OR16-6	0.66537	3.8866	2.54628	1.46991e-10	5.0916e-10
TEX48	0.0478685	0.65696	3.77866	8.72007e-14	4.34556e-13
AC034102.8	0.360735	1.00805	1.48255	2.056e-06	4.48558e-06
KLF6	324.727	97.3864	-1.73744	2.58803e-26	6.91452e-25
AC015923.1	0.0719222	1.13752	3.98331	1.24021e-05	2.47935e-05
VPS9D1-AS1	1.00437	6.74094	2.74666	5.06693e-23	7.6273e-22
OAS1	23.8298	55.5969	1.22223	3.18414e-08	8.47786e-08
HMGA2	0.0792167	4.76207	5.90964	1.2242e-10	4.28295e-10
ST3GAL3	0.252622	0.58031	1.19984	0.000123824	0.000219493
AL035411.1	0.866081	1.85177	1.09633	1.17519e-06	2.6268e-06
TMEM212	4.13929	0.853453	-2.278	2.56279e-14	1.35466e-13
AL731569.1	0.402969	0.850744	1.07806	8.95759e-11	3.1903e-10
LINC01571	0.900609	0.201476	-2.16029	6.7267e-12	2.72691e-11
AL157931.2	0.103802	0.34714	1.74168	0.0022302	0.00336171
AC095057.4	0.323152	1.06274	1.7175	1.92682e-09	5.86597e-09
IZUMO4	1.68349	3.56387	1.08199	5.56676e-05	0.000102939
H2AC17	0.0303019	0.276104	3.18773	3.38869e-11	1.26759e-10
AL590666.2	0.485665	6.53596	3.75037	4.47763e-14	2.30104e-13
SCLY	0.263981	0.554166	1.06988	2.36619e-13	1.12136e-12
AL163952.1	0.0298537	0.114665	1.94145	0.000210729	0.00036322
TUBB1	3.18637	0.526756	-2.59671	3.69033e-27	1.19188e-25
CAVIN2	393.593	39.3089	-3.32378	7.20628e-33	6.25834e-30
TMEM82	0.0311704	0.950755	4.93083	3.81477e-14	1.97753e-13
AP003068.4	0.370607	1.02724	1.47081	0.000233799	0.000400792
HAS1	14.1112	1.25258	-3.49387	5.56436e-09	1.61145e-08
TFAP2A	0.419419	5.76662	3.78126	3.43486e-25	7.18954e-24
PCSK1	0.359626	31.6063	6.45757	8.65985e-08	2.19813e-07
AL449106.1	0.2732	0.577859	1.08076	5.74857e-11	2.09386e-10
AL449283.1	0.0549704	0.35474	2.69003	0.0193046	0.025383
CROCCP5	0.0316222	0.146608	2.21296	8.93507e-09	2.52691e-08
KIRREL2	0.0827519	1.29897	3.97243	3.97286e-12	1.64825e-11
ZC3H12B	1.46158	0.699021	-1.06412	1.80763e-16	1.20991e-15
MID1IP1	101.03	50.5097	-1.00015	3.80856e-21	4.4802e-20
NDUFB4P6	0.163457	0.804601	2.29936	0.00249156	0.00373032
SEMA3D	3.84119	1.739	-1.1433	1.69028e-17	1.27521e-16
AC018816.1	0.665607	1.55004	1.21956	1.58718e-06	3.50655e-06
NUF2	0.993622	13.5028	3.76442	3.62974e-31	4.97918e-29
CHML	7.68958	20.2519	1.39708	1.14459e-10	4.01986e-10
TCTE3	1.26645	2.5697	1.02081	5.14145e-10	1.67007e-09
STOM	664.655	290.55	-1.19382	9.44132e-27	2.77849e-25
RSPO4	13.681	2.95626	-2.21033	1.71746e-24	3.21267e-23
P2RY12	4.97898	2.38967	-1.05904	1.34561e-14	7.36626e-14
CALU	79.409	162.012	1.02872	3.4757e-17	2.53523e-16
FAR2	11.5303	5.46178	-1.07799	5.4551e-20	5.54088e-19
AJM1	1.36821	3.78404	1.46763	3.07584e-17	2.26233e-16
ZNF890P	0.0950685	0.217904	1.19665	6.30794e-05	0.000115856
AC105384.1	1.46777	0.351207	-2.06323	1.14656e-22	1.64258e-21
LINC01996	10.8699	0.478832	-4.50468	2.38172e-33	3.37608e-30
RASAL1	0.464443	7.80831	4.07144	1.40082e-28	6.51039e-27
SOX7	32.3199	3.97806	-3.02229	4.77394e-30	3.70235e-28
SERPINB7	0.391706	2.39483	2.61208	0.00727392	0.0101908
IGKV3D-15	6.8946	48.3692	2.81055	1.75197e-13	8.41518e-13
TIMP3	1347.81	342.473	-1.97656	1.73081e-26	4.80018e-25
PRSS42P	0.0662463	0.225522	1.76736	1.02813e-07	2.59089e-07
KRT16	0.654852	21.8758	5.06203	8.18547e-19	7.20181e-18
AC007014.2	0.462957	1.92327	2.05461	8.03376e-14	4.01767e-13
AC128709.2	1.39504	0.280404	-2.31473	1.62325e-29	1.00772e-27
FOXF1	53.7224	7.61275	-2.81904	9.37061e-32	2.09682e-29
NPSR1	0.00551111	0.528637	6.58379	1.98862e-20	2.13371e-19
ROBO4	64.0186	8.6299	-2.89107	7.83137e-32	1.89334e-29
ANKRD18A	0.321654	1.32961	2.04742	4.58831e-13	2.10825e-12
MAG	0.966856	0.249033	-1.95696	2.90179e-19	2.70512e-18
AC034229.4	0.466872	1.43337	1.61832	2.38561e-07	5.76846e-07
AL365436.1	0.846241	1.8864	1.1565	4.77646e-09	1.39393e-08
INPP5K	56.0546	25.5911	-1.13119	4.77395e-30	3.70235e-28
AC087683.1	0.423341	0.182436	-1.21443	1.68654e-09	5.17335e-09
AL592148.1	0.214494	0.845737	1.97927	4.20879e-06	8.87866e-06
AC245060.2	0.785391	1.82331	1.21508	8.29108e-08	2.11082e-07
EFCAB12	2.94666	0.919608	-1.67999	7.74376e-09	2.20505e-08
RNF222	0.0384685	0.253323	2.71923	1.20077e-07	3.00339e-07
PHACTR2	31.4374	11.5209	-1.44823	1.87672e-25	4.12443e-24
AC079460.2	0.0416944	1.02308	4.61692	5.97655e-07	1.38126e-06
AC244033.2	0.905265	2.83107	1.64494	7.43623e-22	9.51535e-21
GS1-24F4.2	0.0531685	0.199201	1.90558	0.0138228	0.0185978
LINC00336	0.127783	0.305139	1.25576	0.00480196	0.00690265
FGL1	0.325185	40.1454	6.94783	3.48622e-16	2.27147e-15
DCC	1.99472	0.326693	-2.61018	4.58669e-26	1.14847e-24
WFDC3	1.02873	16.0012	3.95924	2.1479e-21	2.59733e-20
AC011445.1	1.09763	2.79901	1.35052	1.68363e-07	4.1441e-07
AC133681.1	0.00620926	0.216671	5.12494	5.45404e-14	2.77321e-13
GINS3	2.34975	4.74039	1.0125	3.00483e-12	1.2662e-11
SULT1A1	14.9931	6.07985	-1.30219	4.45224e-23	6.73808e-22
ARID3C	0.115574	0.269653	1.22229	0.00410026	0.00595165
LINC00638	1.73392	3.62842	1.06531	7.88884e-09	2.24372e-08
AC005256.1	0	1.66127	Inf	3.81701e-15	2.21797e-14
AC008966.3	0.16072	0.81955	2.35028	2.89693e-05	5.5301e-05
ABCA12	0.103576	5.1829	5.645	1.16541e-27	4.254e-26
AC006128.1	0.968111	2.18717	1.17582	6.84823e-07	1.57035e-06
SLC23A3	0.202813	0.594168	1.55072	4.32322e-11	1.59865e-10
DNAI3	5.00392	1.46409	-1.77305	2.20573e-12	9.42863e-12
AC021594.1	0.0297796	0.347834	3.546	1.05307e-09	3.30372e-09
PTPRVP	0.0863278	0.312672	1.85675	1.67937e-12	7.26748e-12
AC087163.2	0.223196	0.54743	1.29436	8.7083e-07	1.97276e-06
MTCO1P31	0.0591241	0.290828	2.29835	3.53519e-05	6.68299e-05
AL445183.2	0.103943	1.12212	3.43237	5.9583e-05	0.000109766
UNC45B	0.954146	0.165139	-2.53053	5.73078e-28	2.26348e-26
AC027627.1	0.00413889	0.243819	5.88043	1.2071e-10	4.22484e-10
AL031600.1	1.42638	4.00865	1.49076	6.982e-10	2.23552e-09
SPATA46	0.291924	0.753055	1.36716	6.41526e-06	1.32399e-05
GP9	2.03088	0.209134	-3.2796	1.70434e-26	4.74223e-25
CPA5	0.0755444	0.326943	2.11364	2.36434e-05	4.56049e-05
TPPP	33.0691	10.428	-1.66502	7.70504e-21	8.71428e-20
TGFBR3	38.7443	6.34593	-2.61008	6.50727e-31	7.75855e-29
TTC25	11.3673	4.17372	-1.44548	1.98653e-08	5.40538e-08
PRDM13	0.00282778	0.223964	6.30746	1.21849e-08	3.39185e-08
AP000254.1	1.49107	3.11614	1.06341	2.50062e-06	5.40661e-06
GALNT7	10.2136	34.6331	1.76165	1.28556e-27	4.6264e-26
AC093607.1	0.341281	0.0810018	-2.07494	1.79294e-10	6.14298e-10
SLC24A4	1.10081	0.282868	-1.96036	1.83782e-27	6.3282e-26
CLNK	0.361152	0.891662	1.30389	3.08949e-07	7.37126e-07
AC234917.3	1.31877	3.05744	1.21313	3.12119e-16	2.03937e-15
MIR503HG	0.695076	2.44219	1.81293	1.54863e-10	5.35048e-10
B3GNTL1	1.73092	4.0181	1.21498	5.00059e-21	5.79691e-20
LINC02829	0.952552	0.322167	-1.56399	1.05258e-07	2.6504e-07
CCNB1	7.2148	59.9123	3.05382	1.83763e-31	3.06452e-29
SCN7A	31.1565	5.93783	-2.39152	1.10208e-28	5.23641e-27
AC090589.2	0.143817	0.637829	2.14894	0.00762657	0.0106567
KRT18P10	0.38625	0.816646	1.08018	1.80438e-07	4.42635e-07
LCN12	0.517533	2.65946	2.36141	4.82282e-14	2.46849e-13
ATP1A2	5.71733	1.17592	-2.28156	4.4155e-26	1.11328e-24
FAM107A	172.845	7.07886	-4.60982	1.14274e-32	7.66475e-30
PRDX3P2	0.313135	0.777995	1.31297	1.45708e-05	2.88442e-05
TMEM147-AS1	1.68268	3.3695	1.00177	1.07293e-09	3.36394e-09
ERICH4	1.07745	0.210671	-2.35455	6.86194e-17	4.83386e-16
ODAPH	0.0840741	0.609327	2.85748	5.5738e-08	1.44543e-07
FAM167B	41.0903	14.4952	-1.50322	7.01149e-23	1.03409e-21
IGHV3-15	82.3747	477.598	2.53552	3.60035e-12	1.50103e-11
KLF10	143.171	65.4975	-1.12823	1.16638e-18	1.00985e-17
AC092617.1	0.0324722	0.133604	2.04069	5.84842e-06	1.21319e-05
AC011290.2	0.879759	2.86772	1.70473	3.50027e-16	2.2783e-15
ATOH8	40.6463	12.5929	-1.69051	2.44252e-21	2.94383e-20
FRMD4A	6.11115	2.55682	-1.25709	1.66324e-24	3.1227e-23
AL662791.1	0.779937	2.23048	1.51593	1.40258e-10	4.8716e-10
HSPB7	13.4777	4.78363	-1.4944	5.32147e-23	7.98689e-22
IFNL3P1	0.248637	0.879576	1.82277	4.70592e-05	8.77502e-05
MEX3A	0.888537	17.1071	4.26702	8.3074e-31	9.29664e-29
SLC38A11	0.18307	1.22329	2.7403	7.9596e-05	0.000144581
ACTN1-AS1	0.142394	0.291434	1.03328	0.000154945	0.000271657
CNTNAP3B	0.34205	0.109459	-1.64382	7.8191e-19	6.90326e-18
SLC17A9	3.0912	16.3213	2.40052	3.81952e-20	3.95355e-19
TOGARAM2	3.68154	1.11021	-1.72947	9.57782e-12	3.82378e-11
AC104446.2	0.194317	0.555713	1.51593	0.000778107	0.0012452
ESYT3	14.3439	7.01696	-1.03152	1.43926e-16	9.76883e-16
PAEP	1.07847	195.753	7.5039	3.32721e-12	1.39559e-11
HOXC8	0.283676	1.71609	2.59681	2.34593e-07	5.67699e-07
AC004895.1	0.0945833	0.272825	1.52832	8.59738e-10	2.72297e-09
LINC01096	0.0271111	0.224082	3.04707	0.000411915	0.000684245
STRCP1	0.0334981	0.145982	2.12364	1.05861e-09	3.32067e-09
AC104472.5	0.0451796	0.54035	3.58015	0.00126556	0.00197087
ANGPT1	26.3556	5.46816	-2.26898	4.55571e-29	2.44713e-27
AC010531.5	0.399157	0.8236	1.04499	0.00032884	0.000553417
AC092354.2	2.8801	1.42535	-1.0148	1.08087e-19	1.05949e-18
AC008013.1	0.178252	0.356593	1.00036	0.00357479	0.00523238
ESPL1	0.67473	6.21603	3.20361	1.24829e-27	4.51133e-26
TLX1	0.00345185	0.289754	6.39131	5.42712e-10	1.75727e-09
MUC5B	6.81404	125.512	4.20317	7.42802e-08	1.90268e-07
KCTD16	0.899615	0.29444	-1.61134	9.56377e-23	1.38654e-21
RRAD	133.532	57.9641	-1.20395	3.36585e-11	1.25979e-10
DRC3	6.16402	2.41262	-1.35327	5.42502e-12	2.21684e-11
OGFOD1P1	0.0585056	0.143431	1.29371	0.000129789	0.000229547
IL31RA	0.121456	2.20629	4.18312	1.46172e-13	7.07719e-13
AC005387.2	0.628504	1.3374	1.08944	1.35751e-08	3.75956e-08
NKX1-2	0.00862963	2.08716	7.91803	5.14202e-18	4.13224e-17
AC117488.1	1.13585	0.33439	-1.76416	1.52366e-22	2.1443e-21
LINC01352	3.18788	0.612262	-2.38037	4.94937e-27	1.54949e-25
SCIMP	14.2553	5.07295	-1.4906	2.1372e-26	5.8197e-25
IGHV1-67	1.26934	7.94137	2.64531	4.23896e-12	1.7538e-11
GAPDHP22	0.0553481	0.322812	2.54409	4.07072e-10	1.34157e-09
LINC02231	0.568054	0.150023	-1.92085	3.49357e-14	1.82027e-13
MIR378J	1.93711	4.18337	1.11076	6.37153e-05	0.000116965
AC023855.1	0.079537	0.292024	1.87639	0.000991737	0.00156711
GRHL3	0.2851	3.37461	3.56518	9.71835e-27	2.85344e-25
PLXNB3	1.01051	10.1993	3.33531	4.45416e-19	4.04585e-18
TRPV1	1.83892	4.44749	1.27413	1.34621e-11	5.28033e-11
CEACAM1	7.51419	32.0174	2.09117	9.84327e-21	1.09577e-19
SLC34A3	0.327991	1.05985	1.69214	0.000186435	0.000323773
GLDN	15.8981	2.90683	-2.45134	3.1895e-27	1.03406e-25
BCL11A	0.778765	1.58195	1.02244	0.000142098	0.000249958
PTPN2P1	0.0524389	0.569103	3.43998	0.00064572	0.00104434
AC027281.1	0.0889037	0.509709	2.51936	1.06874e-11	4.2455e-11
CASP4LP	8.39188	2.96405	-1.50142	7.07036e-25	1.40499e-23
NGEF	0.975554	8.22686	3.07605	9.94265e-19	8.66418e-18
Z98752.2	0.0962222	0.558629	2.53745	0.000101121	0.000181314
COPDA1	0.655207	1.63086	1.31561	2.29917e-07	5.57053e-07
HJV	0.0415722	0.134852	1.69769	0.0205852	0.0269764
AP006545.2	0.277037	0.841357	1.60264	1.5789e-07	3.89722e-07
HCG21	0.2567	0.0972527	-1.40027	8.64271e-12	3.46782e-11
CHRNB2	0.0924519	0.805762	3.12358	0.0397175	0.0497542
ISYNA1	22.7894	50.6613	1.15252	1.03541e-10	3.65654e-10
AC093865.1	0.12303	0.625196	2.3453	0.000525516	0.000860901
VGLL3	15.9115	7.17061	-1.1499	8.89532e-21	9.95894e-20
OR1L8	0.570609	0.195504	-1.54531	1.08793e-23	1.80133e-22
AC121757.2	1.62164	3.63831	1.16581	0.000563592	0.000919911
CD70	1.16836	2.80451	1.26326	0.000328825	0.000553417
CYBRD1	302.342	88.6205	-1.77047	2.72989e-28	1.17459e-26
AC020663.2	0.0508833	0.112429	1.14375	0.00235178	0.00353474
RNF212	2.43755	8.80231	1.85245	8.50582e-06	1.73233e-05
UFSP1	3.11619	6.31868	1.01984	2.25384e-11	8.61655e-11
CD163	119.901	57.2614	-1.0662	1.1101e-15	6.83333e-15
TSKU	19.2914	64.971	1.75184	3.83884e-16	2.48789e-15
INSL4	0.0289611	7.42183	8.00151	1.34355e-05	2.67274e-05
AL109741.1	9.09981	1.54078	-2.56218	1.50241e-29	9.44184e-28
LINC02056	0.272906	0.122949	-1.15034	1.33716e-09	4.14553e-09
AL079303.1	0.145837	1.4797	3.34288	1.57086e-18	1.3387e-17
SAMD12-AS1	0.313454	0.924885	1.56102	3.76125e-15	2.18657e-14
AC020928.1	0.0751593	0.562798	2.90459	1.81194e-06	3.97554e-06
FOXF2	21.963	9.09525	-1.27189	3.21121e-21	3.80734e-20
AC084876.1	0.189161	0.465391	1.29883	1.35987e-05	2.70352e-05
LRRIQ4	0.274189	1.20298	2.13337	4.21755e-06	8.89639e-06
GPR4	21.5742	7.04649	-1.61433	5.04326e-21	5.83578e-20
LINC02331	0.181393	1.16757	2.68633	3.14206e-06	6.72338e-06
RBM46	0.0160333	0.554818	5.11287	1.91453e-06	4.18911e-06
EPYC	0.0588407	2.5911	5.46061	1.44033e-15	8.77087e-15
SNORA38B	0.218161	6.11237	4.80827	1.72059e-10	5.90861e-10
AC117503.2	0.56477	1.45664	1.36691	5.95996e-06	1.23442e-05
EEF1A1P6	115.274	30.5026	-1.91807	7.40444e-20	7.38562e-19
RCC2	57.0705	116.606	1.03082	3.37996e-21	3.99998e-20
SERINC2	48.1904	198.742	2.04408	1.31299e-23	2.14063e-22
SLC6A4	107.792	1.5176	-6.15031	3.31996e-32	1.12945e-29
AC084064.1	0.322393	0.0894898	-1.84902	1.52432e-15	9.25362e-15
AL662890.1	0.105828	0.785193	2.89133	1.86446e-11	7.18694e-11
PRSS57	0.558587	0.274012	-1.02754	1.20671e-11	4.76613e-11
PSMA2	0.290754	0.598303	1.04108	2.21835e-05	4.29252e-05
AC008738.4	0.0114	0.123746	3.44028	8.14313e-08	2.07564e-07
AC090825.1	0.845215	0.420853	-1.006	9.05442e-16	5.63335e-15
CDK4	34.4742	69.4412	1.01027	8.17526e-15	4.58544e-14
CRYGN	0.126024	1.21542	3.26969	3.36204e-14	1.7564e-13
AC006480.1	0.272619	0.563044	1.04636	0.0296854	0.0379889
AC113139.1	0.764144	1.94328	1.34658	1.65241e-07	4.06845e-07
AC108053.1	2.34103	0.498767	-2.23071	7.98168e-28	3.03065e-26
AC254629.1	0.0123778	0.220745	4.15655	7.38423e-11	2.65171e-10
FGR	91.069	21.1508	-2.10625	7.68485e-31	8.83239e-29
PLAAT1	0.692241	5.33178	2.94527	6.88876e-13	3.10459e-12
UPK3A	0.559907	5.2543	3.23024	2.72568e-09	8.16456e-09
FRMPD3	0.384209	1.56735	2.02836	3.99826e-06	8.45971e-06
UMODL1-AS1	2.55503	0.622503	-2.03719	3.15908e-08	8.41553e-08
CDCA8	3.33887	29.3252	3.13471	7.52681e-31	8.68989e-29
NEGR1	4.2116	1.29787	-1.69823	3.71255e-24	6.62418e-23
CATSPERB	0.625559	2.80344	2.16398	3.11991e-08	8.31465e-08
NANOGNBP3	0.132554	0.485006	1.87143	3.04666e-11	1.14604e-10
AFAP1-AS1	0.232861	19.1635	6.36275	2.68131e-22	3.65068e-21
ASPM	0.528017	7.69193	3.86469	9.55678e-31	1.02887e-28
TBC1D27P	0.224378	0.639425	1.51085	1.22353e-08	3.40514e-08
BMPR2	73.9347	29.7405	-1.31383	8.89745e-24	1.49551e-22
ZNF322	3.28884	7.78946	1.24395	2.2085e-07	5.3636e-07
GARS1	12.1625	26.3711	1.11652	5.60041e-26	1.37796e-24
CAPSL	27.9619	6.09122	-2.19866	1.28297e-11	5.04626e-11
SEMA3B	67.369	21.4616	-1.65032	6.41517e-23	9.51646e-22
AL109924.1	0.0155148	0.148983	3.26343	1.11793e-09	3.49773e-09
CLIC3	230.083	62.9078	-1.87085	2.30734e-26	6.23642e-25
CLCN2	0.971911	2.4678	1.34433	1.49287e-20	1.61881e-19
CCDC154	0.527557	3.08279	2.54684	2.27088e-09	6.86836e-09
ESPN	1.47474	6.92635	2.23163	1.14069e-12	5.00941e-12
PCYT1B	2.54392	0.633739	-2.00509	1.065e-21	1.33334e-20
AL133335.2	0.0235093	1.61768	6.10455	1.81052e-22	2.51609e-21
GAPDHP21	0.0612611	0.256741	2.06727	2.76236e-07	6.63357e-07
GTF2IP20	2.96998	6.79053	1.19307	3.23598e-11	1.21367e-10
AC004816.1	1.43745	11.1044	2.94955	9.36052e-31	1.01201e-28
AP002985.1	0.776978	1.72868	1.15373	1.17442e-07	2.94211e-07
AL049634.1	0.653794	0.14999	-2.12397	1.66854e-26	4.66296e-25
AC009171.2	0.928924	1.97271	1.08655	9.2894e-08	2.35115e-07
AVL9	8.55942	19.4365	1.18319	1.09222e-22	1.56914e-21
LINC02195	1.16049	3.9909	1.78199	3.02063e-08	8.06101e-08
AC069277.1	0.0108111	0.259404	4.58462	3.87217e-07	9.14631e-07
MIR3945HG	4.13012	0.423509	-3.28572	6.00119e-30	4.46415e-28
AC124856.1	0.0630074	0.262224	2.0572	0.00164383	0.0025219
AQP6	0.0754574	0.510132	2.75714	6.8911e-06	1.41704e-05
LINC01169	2.33106	0.506319	-2.20287	1.12315e-21	1.40407e-20
VAMP2	114.2	50.4237	-1.17938	8.67853e-28	3.25636e-26
RPS3AP53	0.0339074	0.190553	2.49052	2.8348e-08	7.58573e-08
RNU6-118P	2.67056	5.71715	1.09815	0.0379839	0.0477348
AC013268.4	0.0157444	0.175041	3.47478	8.28118e-16	5.17625e-15
OR7E14P	2.49421	5.41133	1.1174	2.9953e-12	1.26239e-11
AL133243.2	1.47596	4.09905	1.47364	4.0461e-10	1.3338e-09
PRSS44P	0.241676	0.896851	1.8918	9.35728e-08	2.36715e-07
IGHJ5	6.22196	41.1159	2.72425	3.45187e-15	2.01405e-14
PIF1	0.602619	3.0455	2.33736	1.0826e-22	1.55764e-21
LINC00472	2.86976	0.954426	-1.58822	1.09287e-24	2.11889e-23
FDPSP2	0.0625944	0.266191	2.08835	0.000304369	0.000514372
SCEL	113.752	44.5139	-1.35356	3.05132e-20	3.19076e-19
LINC01342	0.162172	0.397553	1.29362	0.00096531	0.00152772
WDR12	5.28487	10.9352	1.04903	7.75797e-25	1.53445e-23
RNU5B-4P	5.27093	1.11411	-2.24216	7.80628e-25	1.54281e-23
AP001189.1	8.08002	0.92228	-3.13108	9.07713e-26	2.12675e-24
HEYL	37.4098	18.2941	-1.03204	4.80636e-14	2.46056e-13
ZNF367	2.48783	6.27878	1.3356	2.02285e-14	1.08135e-13
FAM180B	0.563333	0.129928	-2.11628	1.64698e-14	8.90686e-14
KLF4	151.177	30.4032	-2.31394	4.26963e-27	1.36174e-25
P2RY14	12.1118	4.54362	-1.41449	5.90781e-22	7.6907e-21
AC104958.2	1.1704	3.25854	1.47722	0.000254628	0.000434455
BFSP2	0.258465	0.604283	1.22526	1.69753e-10	5.83254e-10
LINC00671	0.356009	0.170545	-1.06177	1.66625e-11	6.45723e-11
CCNB2	2.9764	25.9494	3.12406	2.9616e-30	2.51884e-28
PGM5-AS1	0.4887	0.103393	-2.24081	7.88338e-26	1.86937e-24
SOD3	136.061	64.1297	-1.08519	1.16376e-19	1.13855e-18
TSPAN6	23.5184	51.8259	1.13989	7.37742e-18	5.8241e-17
EFCAB13	0.773683	1.92502	1.31506	4.65051e-07	1.08771e-06
KRT16P6	0.13648	1.33794	3.29326	0.000533198	0.000872981
IGKV2D-29	17.2183	92.913	2.43194	1.63591e-08	4.49786e-08
CIB2	3.47291	8.52208	1.29506	1.93414e-06	4.22876e-06
HAVCR1	0.122754	4.6106	5.23112	2.29313e-15	1.36385e-14
AC005281.1	0.217413	0.507985	1.22435	0.0121641	0.0165115
RTN1	11.6763	3.99999	-1.54551	3.71988e-26	9.52938e-25
TRPV2	76.2849	20.8534	-1.87112	5.45194e-31	6.95531e-29
AL139095.5	0.0582185	0.186997	1.68347	1.91664e-05	3.73791e-05
NPC1L1	0.156641	2.88802	4.20455	5.83048e-06	1.20977e-05
MTFP1	0.480813	1.10753	1.20379	6.0337e-15	3.43335e-14
CENPA	0.896915	11.8841	3.72792	3.4524e-29	1.9108e-27
MRM1	6.85004	16.5764	1.27495	1.7366e-23	2.78151e-22
AL137002.2	0.221267	0.614176	1.47287	9.19827e-10	2.90211e-09
RN7SKP239	0.68895	2.24014	1.70112	9.28257e-07	2.09783e-06
SLC12A7	43.7207	102.146	1.22424	1.84168e-14	9.90733e-14
AL049874.2	0.0689185	0.347169	2.33267	1.32614e-06	2.94949e-06
KAT2A	17.9991	57.7962	1.68305	2.90254e-26	7.69039e-25
AC026368.1	0.534917	3.05045	2.51163	7.20043e-10	2.30051e-09
ZBP1	1.65202	3.57985	1.11566	9.16542e-08	2.32023e-07
CIART	3.77019	8.47727	1.16896	3.40185e-08	9.02831e-08
CYP27B1	1.51684	8.4618	2.4799	2.22066e-26	6.02767e-25
CASC4P1	0.0904093	0.332795	1.88009	1.13549e-10	3.9901e-10
AL121829.2	0.0787333	0.30988	1.97666	9.29349e-06	1.88477e-05
AP001453.1	0.143513	0.307667	1.10019	1.95064e-06	4.26411e-06
MPHOSPH9	2.67966	5.6622	1.07932	4.04924e-14	2.09397e-13
CD300C	30.7582	7.57583	-2.0215	1.53875e-30	1.47046e-28
FAM171A2	1.48345	6.13123	2.04722	2.63636e-10	8.86838e-10
AC023024.1	0.0526741	0.124679	1.24305	1.24788e-07	3.11603e-07
LINC00862	0.130387	1.30219	3.32007	5.94777e-23	8.85399e-22
LINC02555	10.7322	2.95508	-1.86068	1.89001e-23	3.01397e-22
PGAP4	11.1025	5.24356	-1.08227	1.39679e-16	9.50126e-16
SAA1	17.6133	85.4982	2.27923	0.00103736	0.00163496
AC117386.2	0.02315	0.742689	5.00367	3.2422e-10	1.07982e-09
AC098869.2	0.747831	1.55684	1.05783	0.000820285	0.00130875
HSPE1	15.1087	38.8795	1.36363	2.638e-26	7.04065e-25
AC084398.2	1.58967	0.779869	-1.02742	1.22145e-14	6.71666e-14
PRKAR1B-AS2	0.0825981	0.235099	1.50909	0.0332485	0.0422121
ATP6V0E1P2	0.830631	0.330644	-1.32893	8.16918e-06	1.66683e-05
RSKR	1.02379	2.40088	1.22964	1.12786e-10	3.966e-10
FAM124B	5.72916	1.52984	-1.90495	1.78215e-24	3.32642e-23
AC104809.1	0.688554	0.288655	-1.25422	5.48392e-07	1.27237e-06
ADGRE3	7.38545	1.01965	-2.85661	2.52409e-27	8.38569e-26
SLCO5A1	0.163609	1.65825	3.34134	2.85948e-23	4.45148e-22
HOXD-AS2	0.121633	0.292217	1.2645	1.04516e-05	2.10708e-05
AC078905.1	0.469596	0.0732425	-2.68067	2.94283e-23	4.57286e-22
KRT18P8	0.240954	0.978639	2.02202	5.87885e-16	3.72575e-15
AC074099.1	0.109263	0.519206	2.2485	1.82861e-07	4.4828e-07
PCDHGA1	0.26733	0.704037	1.39703	1.37393e-05	2.72957e-05
AC130324.2	0.0870259	0.207648	1.25462	0.00624431	0.00883168
AL391987.2	0.0988463	0.257105	1.3791	3.21046e-05	6.09939e-05
LINC02099	0.0445	0.150799	1.76075	5.04375e-17	3.62306e-16
OR7E29P	0.379013	0.123305	-1.62001	2.06717e-12	8.8541e-12
AC024267.5	0.183767	0.830711	2.17647	0.000291379	0.000493562
EN2	0.0424981	0.814764	4.26091	1.98903e-07	4.85462e-07
ALG1L5P	0.206352	1.53613	2.89612	1.32203e-12	5.771e-12
LINC02772	5.1272	1.52861	-1.74595	6.95416e-19	6.16309e-18
AC096637.2	2.02036	0.554944	-1.8642	6.97359e-06	1.43331e-05
BOLA2B	0.648346	1.32304	1.02902	1.98835e-11	7.63818e-11
JAM3	14.3417	5.8998	-1.28148	2.92686e-20	3.07067e-19
AL391427.1	0.416376	6.08024	3.86817	2.07114e-06	4.51553e-06
SLC12A8	6.14921	15.4905	1.33291	1.52896e-18	1.30473e-17
PHLDB2	20.5985	8.05962	-1.35375	5.26207e-21	6.0752e-20
AC245060.6	0.283811	0.762382	1.42558	2.00067e-11	7.68435e-11
ABCC2	0.360489	9.90188	4.77968	1.54876e-05	3.05809e-05
AC104365.2	0.313809	0.102929	-1.60823	4.11858e-06	8.70274e-06
TTPA	1.65482	0.60938	-1.44126	5.24622e-20	5.33722e-19
RCAN1	60.8798	18.0626	-1.75296	2.88912e-25	6.12258e-24
LINC00970	0.051113	0.154727	1.59796	0.00353742	0.00518036
KRT8P17	0.027013	0.155128	2.52174	3.87321e-06	8.20533e-06
AL359092.2	0.0772833	0.154966	1.00373	0.014704	0.0197065
MTMR10	17.8379	8.31861	-1.10053	1.10156e-26	3.20118e-25
AC120114.1	0.52162	1.70959	1.71257	4.67082e-18	3.77497e-17
PPIAP42	0.459919	1.02874	1.16143	0.00813218	0.0113266
AL732437.2	0.0208481	0.200357	3.26458	1.02538e-05	2.06901e-05
AC019206.1	0.0686278	0.489335	2.83396	4.14699e-08	1.09083e-07
LCAL1	0.0925315	22.1742	7.90472	6.29163e-28	2.46213e-26
COX6B2	0.0813037	0.626022	2.94482	2.48707e-14	1.31819e-13
CAPN10-DT	0.935643	2.24966	1.26568	8.43856e-15	4.72171e-14
PIP5KL1	3.20364	9.85991	1.62186	1.76265e-12	7.60339e-12
AC010776.2	1.44209	0.109502	-3.71914	1.23915e-33	2.14146e-30
AC087854.1	1.63212	0.802335	-1.02447	9.12746e-27	2.69545e-25
AC135586.1	0.0802926	0.286124	1.8333	0.000347238	0.000582459
AC018892.3	0.0160685	0.123857	2.94637	1.60471e-14	8.68749e-14
RERG	18.3692	8.44487	-1.12114	1.81162e-17	1.36032e-16
TRH	1.15424	0.460621	-1.3253	1.68733e-05	3.3135e-05
IGKV1OR22-1	0.99157	6.37395	2.6844	3.19342e-10	1.06413e-09
IGKV1D-35	0.168822	0.645683	1.93532	1.14448e-06	2.56243e-06
DLX3	1.0911	5.33276	2.28909	1.4801e-07	3.66541e-07
AC017104.4	0.713578	1.65708	1.2155	1.75901e-08	4.82109e-08
IGLV3-21	125.719	859.77	2.77375	3.38632e-14	1.76836e-13
SYNPO2	10.9388	3.0693	-1.83348	1.15006e-25	2.62235e-24
SPTBN5	0.735728	1.76545	1.26279	9.32485e-08	2.35988e-07
RN7SL239P	0.151893	0.892533	2.55485	1.50816e-07	3.73127e-07
AC008740.1	0.150776	0.480072	1.67084	0.00257946	0.00385243
AC009065.4	4.12499	1.98151	-1.05779	3.74512e-10	1.23858e-09
AC135178.2	0.355511	0.1084	-1.71353	1.00812e-08	2.83127e-08
AC027801.1	1.0018	2.94192	1.55416	7.18909e-09	2.05523e-08
MIR9-3HG	0.232583	1.56209	2.74766	1.7517e-05	3.43276e-05
PCNPP1	0.686561	1.64627	1.26174	2.5464e-12	1.08052e-11
LINC01612	3.01479	1.32482	-1.18626	3.82373e-18	3.121e-17
AC125494.1	0.128693	0.299015	1.21629	5.09569e-10	1.65626e-09
CCDC173	9.17446	2.05396	-2.15922	1.54938e-15	9.39241e-15
IL36G	0.0747685	1.73339	4.53502	1.82341e-15	1.09624e-14
HMGA1	80.318	413.661	2.36465	7.09965e-26	1.71541e-24
THORLNC	0.23255	0.50805	1.12743	2.78522e-06	5.99355e-06
AFP	0.0127778	4.98688	8.60836	1.19557e-06	2.67025e-06
C1QC	1038.95	508.631	-1.03043	1.39376e-17	1.06249e-16
AQP10	0.713091	0.137956	-2.36988	7.91464e-25	1.56181e-23
AC027601.1	0.203244	0.468684	1.2054	2.98752e-08	7.97933e-08
AC103705.1	0.0170093	1.04557	5.94182	1.28913e-10	4.49778e-10
LINC01913	0.0428222	0.322643	2.91351	0.000121069	0.000214877
SPAG8	5.78927	2.26604	-1.35321	3.44415e-12	1.44156e-11
AC084880.3	1.08696	0.249311	-2.12429	2.25121e-17	1.67316e-16
PADI1	0.0393722	3.67108	6.54288	9.00284e-14	4.47424e-13
OSBPL6	5.9787	2.05849	-1.53825	4.61882e-19	4.18945e-18
WWC2	53.0065	10.6274	-2.31838	1.1816e-31	2.39274e-29
IGKV1D-43	1.48741	6.11647	2.03989	1.58201e-06	3.49661e-06
LINC02594	0.0552185	0.574795	3.37982	4.11057e-09	1.20664e-08
JARID2-AS1	0.409656	1.1137	1.44288	0.000664633	0.00107262
FGF10	3.44647	0.386205	-3.15768	3.78657e-30	3.09662e-28
LINC01285	0.152835	1.22156	2.99868	2.23406e-12	9.54647e-12
AC108050.1	0.0720093	0.574014	2.99483	0.0360626	0.0455018
AC136475.3	12.5867	51.199	2.02421	9.95725e-06	2.01251e-05
IGLC2	678.437	2640.34	1.96044	7.59951e-13	3.40477e-12
HLX-AS1	0.9085	0.17885	-2.34474	1.57464e-22	2.21078e-21
SATB1-AS1	0.0971093	0.236737	1.28561	3.88151e-05	7.30373e-05
AC010624.1	1.35234	0.329944	-2.03517	2.39492e-12	1.01912e-11
CARMIL2	1.36922	3.33485	1.28427	1.48977e-09	4.59409e-09
AC026273.1	3.52683	11.21	1.66834	1.79363e-21	2.19599e-20
LINC00443	0.656461	0.208097	-1.65745	5.53416e-16	3.51692e-15
ACVRL1	131.823	21.6789	-2.60423	2.80077e-32	1.05091e-29
Z95114.3	2.55449	0.547256	-2.22275	5.29723e-29	2.77024e-27
SLA	33.137	15.574	-1.0893	4.38285e-19	3.98675e-18
AC074117.1	2.63658	5.67036	1.10477	1.10206e-15	6.78877e-15
KCNJ15	43.3151	17.3307	-1.32154	2.25518e-19	2.13669e-18
TENT5B	56.8087	8.29524	-2.77576	1.62003e-31	2.91092e-29
GYPE	6.82382	0.746469	-3.19242	2.98406e-32	1.06924e-29
RFX2	16.3971	5.07427	-1.69216	7.32014e-18	5.78248e-17
AC096677.1	3.59313	7.61188	1.08301	2.10159e-14	1.1218e-13
AL138921.1	0.337996	0.681433	1.01156	6.68661e-06	1.37766e-05
IGLV2-23	180.288	883.56	2.29302	5.35088e-11	1.95626e-10
CFL1P5	0.488983	1.20046	1.29574	4.26227e-13	1.96374e-12
ERICH2	30.9574	14.5523	-1.08903	1.50564e-17	1.14335e-16
GAPDHP65	0.725017	2.44904	1.75613	6.56067e-13	2.96436e-12
FABP5P2	0.494809	0.219164	-1.17486	4.29713e-11	1.58923e-10
LAIR1	33.7275	16.7376	-1.01083	3.49525e-19	3.22419e-18
COL6A5	5.5455	1.82861	-1.60057	4.04251e-21	4.74446e-20
AL031777.2	0.0574093	0.398513	2.79527	1.30667e-10	4.55522e-10
FBXO41	1.92362	6.59854	1.77832	6.37347e-19	5.67012e-18
NARF-AS1	0.193669	0.744893	1.94344	1.60001e-12	6.93817e-12
GBX1	0.0432407	0.256856	2.5705	0.026001	0.0335703
H4C5	0.150413	4.89644	5.02473	6.20894e-13	2.81038e-12
IGLV3-32	0.0919259	0.631764	2.78084	1.06141e-08	2.97604e-08
AL031710.1	0.10753	0.516153	2.26307	0.00766908	0.0107114
TUBB8P1	0.290159	0.794182	1.45262	0.000454442	0.000749618
GORAB-AS1	0.150107	0.370202	1.30232	2.49539e-10	8.41526e-10
PITPNA-AS1	0.927591	1.88067	1.01969	1.478e-08	4.08345e-08
IGLV5-45	15.7284	74.97	2.25294	2.64152e-07	6.35654e-07
SNCB	0.0795593	0.218587	1.45811	0.000173434	0.000302163
AL109918.1	3.12707	6.79673	1.12003	1.61935e-06	3.57235e-06
IGKV1OR9-2	0.187426	1.40251	2.90361	3.42849e-09	1.01671e-08
FABP4	374.523	12.8759	-4.86231	6.97769e-33	6.25834e-30
DNAJB6P8	0.095663	0.312063	1.70581	0.0323909	0.0411971
AL161757.2	0.157856	0.485235	1.62008	0.0189078	0.0248933
AL121956.1	0.0378704	0.3155	3.0585	0.00938445	0.0129506
NPM1P18	0.0632611	0.175145	1.46916	0.000879016	0.00139748
AC006159.1	1.43966	0.499333	-1.52765	3.67585e-18	3.00771e-17
AC023355.1	0.126015	0.253387	1.00775	3.35509e-05	6.36044e-05
BUB1B	0.846978	9.94126	3.55303	6.89027e-31	8.10162e-29
FAM178B	0.455393	3.37377	2.88918	1.04638e-16	7.22943e-16
WDR45P1	0.134348	0.3117	1.21418	3.05858e-07	7.30026e-07
AP000844.2	0.431619	1.46548	1.76354	0.0281608	0.0361664
ARF4P2	0.0768315	0.165522	1.10725	0.00174423	0.00266778
AC244093.5	0.287487	0.737994	1.36011	2.75655e-05	5.27831e-05
LINC02154	13.6932	1.52701	-3.16468	6.34529e-30	4.58318e-28
DIRC1	0.0160889	0.157504	3.29125	2.55612e-09	7.6792e-09
AC010205.1	0.443567	0.130448	-1.76568	1.51529e-14	8.22962e-14
TCF19	10.7079	25.7386	1.26525	1.54939e-15	9.39241e-15
FLT4	19.8653	7.56159	-1.39349	2.14928e-20	2.29356e-19
FERMT2	50.0804	19.0571	-1.39391	1.36132e-26	3.8508e-25
AL008729.2	96.957	24.1857	-2.00319	1.93128e-30	1.79841e-28
PIMREGP3	0.0616722	0.221553	1.84496	0.0109495	0.0149559
LINC01842	0.171622	2.29569	3.74162	5.03336e-14	2.57007e-13
IGHV3-41	1.07172	5.15417	2.26582	8.51668e-11	3.03954e-10
AL139819.1	0.408598	0.135576	-1.59158	5.88133e-05	0.000108424
AC004925.1	0.044437	0.258372	2.53962	6.28355e-07	1.44881e-06
GJA4	47.0152	16.4511	-1.51494	6.5342e-24	1.12345e-22
AOC4P	0.87393	0.33878	-1.36717	4.52605e-18	3.6661e-17
AL135841.1	1.2308	0.231608	-2.40984	1.94019e-19	1.852e-18
SNCA	2.85719	0.948252	-1.59126	4.05292e-26	1.03307e-24
LRFN4	5.38133	12.2715	1.18928	5.93546e-07	1.37227e-06
AC010327.7	0.0806111	0.177138	1.13582	0.000179632	0.000312364
AP000553.9	0.294615	0.678154	1.20278	0.00851462	0.0118264
LPL	190.145	45.0695	-2.07688	7.85927e-27	2.35639e-25
EPHB1	0.62742	1.92695	1.61881	0.00308991	0.00456324
CGNL1	64.9071	14.2985	-2.18251	7.64304e-30	5.34281e-28
AC010148.1	0.153706	0.445246	1.53443	2.91355e-06	6.2554e-06
AC011373.1	0.177817	0.708694	1.99477	0.00884074	0.0122493
SSBL4P	0.139957	0.350815	1.32572	0.00197108	0.00299127
GCM1	0.0654426	0.496566	2.92368	5.07053e-13	2.31854e-12
HILPDA	13.2333	39.6071	1.58158	4.24365e-12	1.75546e-11
SLC22A11	0.0205111	0.144617	2.81776	4.26058e-08	1.11955e-07
XBP1P1	0.589519	1.19066	1.01415	0.0022891	0.0034454
KBTBD12	0.560961	2.53831	2.17789	0.00301887	0.00446528
C8G	1.06557	3.03812	1.51156	0.000642921	0.00104001
AC006449.3	0.0838796	0.371407	2.14661	1.40619e-09	4.34844e-09
PTK6	10.4559	33.8097	1.69312	1.12966e-12	4.96442e-12
AL031777.1	0.344035	2.40338	2.80444	2.24057e-12	9.57272e-12
LINC01281	0.113219	0.427544	1.91696	8.01106e-14	4.00867e-13
IGLV3-9	22.985	128.561	2.48369	1.17853e-13	5.77163e-13
AC093591.3	0.346959	0.760956	1.13305	0.00176673	0.00269928
AC009237.3	1.56386	3.88854	1.31412	6.66166e-07	1.53087e-06
DNASE1	2.01595	4.5243	1.16624	2.50785e-14	1.3281e-13
NKAPL	2.16007	0.722573	-1.57986	1.69103e-29	1.03974e-27
DHRS13	1.77105	4.11619	1.21671	8.71357e-19	7.63747e-18
AC007391.2	0.0784796	0.330886	2.07594	3.11104e-06	6.65924e-06
AL031710.2	0.15362	0.857297	2.48042	1.20873e-13	5.91387e-13
IGKV1D-17	2.49868	12.7244	2.34836	6.95488e-06	1.42958e-05
CAB39L	21.9905	8.41698	-1.38551	5.98529e-26	1.46559e-24
AC044802.2	0.154343	0.473099	1.61601	8.1301e-06	1.65912e-05
SIM2	0.0211944	0.913652	5.42989	1.64655e-12	7.1315e-12
AC009994.1	0.379944	1.75638	2.20874	0.0287669	0.0368967
SNORA9B	0.825646	1.7122	1.05226	1.82882e-05	3.57348e-05
LIPK	0.00303333	0.925605	8.25335	1.34838e-13	6.55232e-13
RAD51	1.60805	7.88223	2.29329	1.08054e-26	3.14368e-25
IGHV4-31	40.1611	176.276	2.13397	1.22482e-08	3.40798e-08
GS1-279B7.1	0.0254222	0.318092	3.64528	0.000102565	0.000183808
GOLGA2P8	0.430898	1.12775	1.38803	1.58465e-08	4.36446e-08
TCEAL3-AS1	0.116102	0.833748	2.84422	0.000514525	0.000844413
RGCC	1066.36	139.919	-2.93003	7.44221e-33	6.25834e-30
PCAT6	2.67394	17.6855	2.72553	1.0461e-27	3.8571e-26
CSRNP1	258.67	50.2476	-2.36399	1.21706e-25	2.76275e-24
RAD54B	0.301444	1.17527	1.96303	1.24842e-26	3.57105e-25
AL669970.3	0.44017	0.172971	-1.34753	1.13115e-12	4.97007e-12
MAPRE1P1	0.108552	0.256261	1.23923	0.030359	0.0387926
IGFL2-AS1	0.0366778	0.625832	4.0928	8.01746e-07	1.82436e-06
AC006483.2	0.106883	0.234675	1.13463	0.0171938	0.022792
AL359740.1	0.168937	0.895422	2.40608	0.0162452	0.0216255
AC010326.4	1.35836	2.89373	1.09106	3.7416e-14	1.94275e-13
AC100791.2	0.0153	0.260906	4.09192	2.99546e-10	1.00064e-09
RN7SL213P	0.160259	0.324898	1.01958	0.0398546	0.0498989
VAC14-AS1	0.0467037	0.295356	2.66084	3.47715e-13	1.6169e-12
RNU1-38P	2.54262	1.16888	-1.12119	5.55802e-15	3.17681e-14
ADRB2	76.9364	9.12245	-3.07617	7.6037e-33	6.25834e-30
DLGAP3	0.351215	1.01996	1.53809	0.00314862	0.00464536
CSP2	0.589124	0.175749	-1.74506	3.46797e-19	3.20036e-18
AC091152.1	0.0303963	0.167351	2.46091	8.40925e-05	0.000152226
AC074117.2	0.34375	0.99719	1.53651	2.4959e-11	9.49641e-11
LINC02884	1.59403	0.447736	-1.83196	8.75271e-23	1.27622e-21
HNF1A	0.0992833	1.34231	3.75703	0.000148341	0.000260572
DKK2	15.9412	3.11899	-2.35361	8.40978e-29	4.11657e-27
GPSM2	1.49733	3.35605	1.16437	1.16431e-11	4.6108e-11
ECM2	18.9361	8.12863	-1.22005	4.67506e-19	4.23895e-18
AC027601.2	1.84057	0.537127	-1.77682	2.32957e-22	3.19654e-21
CGB7	0.0625148	0.18612	1.57396	4.08883e-05	7.67501e-05
ABI3BP	49.2744	8.66414	-2.50771	1.03834e-30	1.0977e-28
LYPD3	2.40888	26.919	3.48219	6.48167e-17	4.59006e-16
CASQ2	7.7714	1.16968	-2.73206	2.38064e-27	8.01347e-26
SPP1	28.13	821.283	4.8677	4.48105e-28	1.82351e-26
ADAMTS8	46.1383	3.83544	-3.5885	2.2636e-32	9.79557e-30
TFAP4	2.76744	6.65935	1.26683	2.06047e-23	3.2715e-22
CCDC141	2.748	0.375493	-2.87153	5.74207e-29	2.96591e-27
MIR4527HG	0.0256148	0.371972	3.86014	0.000161231	0.00028202
LINC01583	0.0237148	0.119813	2.33692	2.47574e-08	6.66405e-08
TNFRSF25	3.01584	10.7497	1.83366	3.95675e-17	2.87216e-16
RALY-AS1	0.903293	2.04365	1.17788	1.43749e-17	1.09355e-16
APLN	44.7392	14.0792	-1.66798	7.16814e-16	4.5037e-15
NRGN	177.057	74.7847	-1.2434	1.31062e-20	1.43275e-19
MROH9	2.19779	0.443497	-2.30906	8.0199e-14	4.01152e-13
CFAP161	4.67634	1.00523	-2.21786	3.12851e-21	3.71793e-20
ZNF101P2	0.0702056	0.245472	1.8059	0.0116026	0.0157973
AL157829.1	0.0238722	0.638454	4.74118	6.18578e-08	1.59812e-07
AC135178.1	2.81325	0.984388	-1.51494	3.98166e-12	1.65164e-11
C1orf198	166.576	73.081	-1.18861	2.69469e-24	4.89489e-23
FEN1	15.9698	50.8229	1.67013	4.25061e-26	1.077e-24
RN7SL809P	1.00469	2.41611	1.26594	0.000559054	0.000913088
PRX	60.9893	5.76483	-3.40321	5.56668e-31	6.96246e-29
AC145124.1	1.88533	0.797512	-1.24124	3.02893e-17	2.22864e-16
CXCL9	51.3168	130.38	1.34522	0.00139666	0.00216302
GABRR1	0.0370167	0.566861	3.93675	0.0241039	0.0312601
MIR4768	1.69318	5.19693	1.61792	0.0131549	0.0177516
CFTR	15.7622	6.60859	-1.25405	6.4615e-18	5.13765e-17
AL121790.2	8.14961	2.89058	-1.49537	1.4244e-07	3.5333e-07
TTLL7	6.06112	2.22812	-1.44376	1.35542e-20	1.47793e-19
AC021269.3	0.0520889	0.120362	1.20834	0.000132594	0.000234192
MARCO	734.376	92.1058	-2.99515	5.56669e-31	6.96246e-29
IGKV1-5	203.373	1220.47	2.58523	3.14877e-13	1.47118e-12
BEND6	0.493139	1.75557	1.83187	6.50591e-10	2.09199e-09
C1QTNF1-AS1	0.344181	0.166481	-1.04781	1.30825e-15	8.00864e-15
LINC00165	1.8447	0.332194	-2.47329	2.31292e-25	5.00119e-24
MIR4537	1.36482	5.14161	1.91351	1.24992e-06	2.78628e-06
RPL23AP92	0.20893	0.527464	1.33606	0.000117792	0.000209513
CDC42P3	0.0871093	0.355491	2.02892	5.70802e-07	1.3222e-06
SIGLEC1	32.969	14.0982	-1.2256	6.04908e-19	5.40604e-18
SERPING1	369.994	138.985	-1.41257	2.92637e-28	1.25069e-26
TROAP	0.77142	11.1198	3.84947	7.14565e-31	8.32519e-29
LINC00431	0.231585	0.619359	1.41923	7.71583e-05	0.00014041
POM121L2	0.0201796	0.11908	2.56096	3.21419e-06	6.87081e-06
AC011503.3	0.0853556	0.444392	2.38028	2.20679e-08	5.97414e-08
KRTAP5-1	0.832643	3.46688	2.05787	1.94325e-13	9.28852e-13
AC090164.2	0.0762648	0.407722	2.4185	0.000651867	0.00105355
PAFAH1B3	13.0473	62.5175	2.26051	4.89813e-28	1.9806e-26
PA2G4P4	0.32927	0.812434	1.30298	3.84643e-07	9.08966e-07
RUNDC3A	0.339276	1.6776	2.30587	0.00138589	0.00214764
DPT	37.8594	12.937	-1.54914	1.24114e-17	9.50978e-17
KRT27	1.21231	0.324495	-1.9015	6.12463e-24	1.05874e-22
RPL22P2	0.582402	1.74253	1.5811	5.65217e-08	1.46486e-07
PACERR	0.533013	1.79527	1.75196	9.98797e-06	2.01856e-05
RPS3AP18	0.321069	0.69415	1.11237	2.2935e-07	5.55786e-07
LINC01409	0.173737	0.579129	1.73698	9.19867e-12	3.67937e-11
LINC01415	0.795124	0.282495	-1.49295	1.22756e-21	1.53085e-20
MSH5-SAPCD1	0.0847963	0.291398	1.78092	1.96817e-11	7.56751e-11
AC131009.3	2.09323	5.22756	1.32041	1.20311e-14	6.6201e-14
AC073140.2	0.0179333	0.28426	3.9865	1.84041e-15	1.10594e-14
CFAP53	15.7911	4.87924	-1.69438	5.61304e-06	1.16692e-05
RNU6-1278P	0.362557	1.00928	1.47704	0.000789328	0.00126236
PRR36	3.10497	14.7488	2.24795	1.78394e-17	1.3415e-16
TYMS	2.84872	7.84821	1.46205	2.64091e-18	2.19846e-17
AC005839.1	1.15727	2.53292	1.13007	3.26622e-08	8.68192e-08
AC011352.3	0.0105556	0.66746	5.98261	9.08098e-17	6.32027e-16
PCCA-DT	2.77395	9.22983	1.73436	6.93766e-22	8.9176e-21
LSR	112.162	291.833	1.37956	1.66011e-21	2.03937e-20
SRD5A3	8.87014	28.3541	1.67653	1.01839e-18	8.86527e-18
RAB11FIP1	104.018	39.5429	-1.39534	1.51021e-21	1.8651e-20
CD5L	3.83028	0.264941	-3.8537	2.27317e-31	3.47304e-29
AC021321.1	0.522735	1.22826	1.23247	1.74549e-08	4.7853e-08
MRPL12	8.83637	19.857	1.16812	2.85003e-14	1.50028e-13
AL359704.2	0.0755722	11.9393	7.30364	1.14739e-06	2.56827e-06
AC211476.2	0.327881	0.944386	1.5262	0.000107589	0.000192384
ICAM2	19.2056	7.01184	-1.45366	1.64236e-27	5.72469e-26
SEC61G-DT	0.160531	0.989835	2.62433	0.000290778	0.000492577
DIO2	1.26342	6.97616	2.4651	1.47745e-16	1.00125e-15
AC093567.1	1.21676	0.601376	-1.01671	8.39137e-19	7.37279e-18
NEB	0.201422	0.830222	2.04327	5.72754e-05	0.000105759
AP003555.2	1.84221	0.577664	-1.67314	1.35973e-17	1.03717e-16
CYP27A1	237.972	72.2063	-1.72059	3.04488e-28	1.29484e-26
HTR6	0.0733926	0.251467	1.77666	4.31305e-07	1.01268e-06
POLQ	0.241006	2.5983	3.43043	1.18199e-28	5.57457e-27
RNU6-882P	1.69631	3.97301	1.22783	1.85068e-06	4.05671e-06
AC009093.10	0.693539	0.160869	-2.10809	3.25923e-22	4.38372e-21
TLCD3B	0.0289167	0.272381	3.23565	4.07079e-17	2.94907e-16
AL136369.1	7.9306	0.922054	-3.10451	4.99877e-33	5.31432e-30
AC023024.2	0.531359	1.32662	1.31999	1.0207e-05	2.06038e-05
AL158168.1	0.630752	0.138605	-2.18609	4.19589e-09	1.23098e-08
GNG7	12.8476	6.05052	-1.08636	8.31411e-21	9.34514e-20
AL022318.1	0.0697167	0.361858	2.37585	0.00247612	0.00370982
AC079089.1	0.0526722	0.554487	3.39604	2.31683e-19	2.18859e-18
GRID2IP	0.759224	1.8426	1.27915	1.32597e-13	6.45528e-13
SMCR5	0.0367222	0.242627	2.72401	0.0344398	0.043616
ITPRIP	39.6943	12.5675	-1.65924	6.87614e-25	1.37066e-23
KRT83	0.0302093	1.29205	5.41852	1.98989e-14	1.06552e-13
MIR4538	1.36139	3.71644	1.44884	2.07015e-06	4.51374e-06
JAK3	6.78264	14.3478	1.08091	5.82382e-15	3.31981e-14
IGLON5	0.175541	0.96855	2.46402	1.91108e-13	9.13643e-13
AC243547.1	0.0704315	0.229256	1.70267	1.90378e-05	3.71368e-05
CCDC178	0.489252	0.114467	-2.09564	2.0377e-14	1.08884e-13
AC114748.1	0.344674	1.21053	1.81234	0.00975569	0.0134332
EN1	0.0250426	0.270663	3.43404	0.0133274	0.017972
EEF1AKMT4	4.12825	18.0128	2.12543	1.1316e-27	4.13651e-26
AL157827.2	0.0697648	0.181876	1.38239	0.00936387	0.0129237
PTPRD-AS1	1.13853	0.251352	-2.1794	2.91832e-27	9.50971e-26
ATP5MC1P4	0.575324	2.22159	1.94915	9.5556e-16	5.92637e-15
AC000082.1	2.9304	0.509876	-2.52288	2.25321e-23	3.56147e-22
AC138305.1	0.0134407	0.234143	4.1227	2.23577e-06	4.86034e-06
FSIP2-AS1	0.0574185	0.187827	1.70982	0.000244495	0.000418088
MMP10	0.967204	16.9487	4.13121	1.04768e-10	3.69633e-10
AC084117.1	2.04374	4.21808	1.04537	0.000699827	0.00112642
ADSS1	3.15335	10.159	1.68781	8.94329e-13	3.97748e-12
DLX6-AS1	0.0117833	0.340813	4.85416	9.96605e-10	3.1335e-09
TM4SF5	0.0337778	8.42112	7.96179	7.94198e-07	1.80783e-06
AC007497.1	0.410765	1.06403	1.37316	2.10871e-07	5.13102e-07
AL133243.1	0.173594	0.661593	1.93022	0.000988116	0.00156187
LINC02343	0.0129667	0.121571	3.22892	2.34602e-09	7.07467e-09
CCNA2	2.91284	23.8981	3.0364	8.66652e-29	4.21997e-27
RASGRP2	9.21838	3.92298	-1.23256	4.7925e-21	5.56333e-20
AC011330.2	0.561359	1.13572	1.01661	4.47484e-06	9.41732e-06
GAPDHP72	0.0860296	0.287176	1.73903	7.12115e-11	2.56199e-10
AC021086.1	0.0538148	0.148176	1.46123	0.00525248	0.00750376
LINC00824	0.0260333	0.459193	4.14067	0.0073328	0.0102721
ZP1	0.11975	0.307565	1.36087	0.00380428	0.00555076
FLVCR1	5.53725	13.4508	1.28045	7.58978e-20	7.56163e-19
REPS2	13.2974	6.34952	-1.06642	5.5461e-20	5.62659e-19
CX3CL1	120.611	56.7475	-1.08773	9.17025e-12	3.66911e-11
LINC02012	0.282802	0.785106	1.4731	6.9399e-07	1.59008e-06
SFTPA2	25922.8	4177.55	-2.6335	1.44341e-28	6.68398e-27
GDF10	37.4152	4.01835	-3.21895	4.47241e-31	5.85202e-29
RSF1-IT1	0.133704	0.564014	2.07669	0.000336626	0.000565512
BPIFA2	0.364983	15.0786	5.36853	1.60447e-10	5.53067e-10
AC104237.2	2.77446	0.242684	-3.51506	5.85374e-36	2.13369e-32
GALNT16	1.98709	0.801967	-1.30905	5.53677e-19	4.97089e-18
GBP7	0.233591	0.085799	-1.44495	1.90649e-15	1.14403e-14
TIGIT	2.29361	5.27198	1.20072	3.6574e-09	1.0812e-08
SYNGR3	0.62583	4.24042	2.76037	1.76817e-23	2.82852e-22
AC025265.1	0.213243	0.709693	1.7347	4.80192e-12	1.97583e-11
AC007431.1	0.0224741	0.317725	3.82144	0.000140728	0.00024765
STPG4	0.0611926	0.291837	2.25374	0.00258043	0.00385365
AL391807.1	0.526278	0.188025	-1.4849	5.24476e-19	4.72195e-18
XDH	0.813019	14.4141	4.14805	6.90813e-25	1.37596e-23
AC096887.2	0.40495	0.916855	1.17895	1.65464e-07	4.07354e-07
AADAC	26.7393	9.05372	-1.56238	1.34267e-20	1.46466e-19
NT5DC4	0.0798056	0.228087	1.51502	0.00110572	0.00173626
AC133540.1	0.0818796	0.592936	2.8563	0.00011745	0.000208955
FAM167A-AS1	0.419459	0.137131	-1.61297	7.85089e-23	1.1486e-21
AC127164.1	0.0658574	0.459865	2.80379	4.21977e-09	1.2377e-08
ADAM12	1.12277	10.6672	3.24804	5.73075e-22	7.47546e-21
MIR6740	0.510787	1.05391	1.04496	0.0110734	0.0151187
AC078850.2	0.0576093	0.562158	3.2866	2.10496e-05	4.08271e-05
VIT	0.793165	0.278962	-1.50755	1.54244e-17	1.17024e-16
FILIP1	8.24334	2.39084	-1.78571	8.01254e-27	2.39953e-25
ERG	32.3225	7.12761	-2.18105	1.13984e-30	1.15869e-28
ENTHD1	0.166111	0.423668	1.35078	0.00244329	0.00366342
AC110285.3	0.514361	1.35345	1.39579	0.0014266	0.00220684
AC127070.1	0.504148	1.18214	1.22948	1.95401e-08	5.32143e-08
RNU6-856P	1.10845	2.41727	1.12483	0.00463933	0.00668394
TAL1	10.7956	1.52093	-2.82741	2.33897e-31	3.53129e-29
SYT12	0.199552	10.1413	5.66734	7.34092e-28	2.84224e-26
SEMA3A	2.72062	9.72534	1.83781	0.0024231	0.00363564
APOBEC1	0.00882963	3.02853	8.42205	3.28578e-13	1.53154e-12
SLC12A3	0.151322	0.472326	1.64216	0.018979	0.0249807
LNX1-AS2	0.078787	0.391714	2.31377	1.08382e-10	3.81851e-10
SETBP1-DT	3.28479	1.50675	-1.12436	2.27277e-18	1.90318e-17
AL691482.3	1.77238	6.70499	1.91955	1.26872e-10	4.4308e-10
RNU6-1099P	0.688752	2.17616	1.65973	1.65135e-07	4.06623e-07
RIPOR1	45.6901	19.3843	-1.23699	2.10309e-24	3.8828e-23
IGKV1OR-2	0.0836574	0.477447	2.51278	5.0876e-10	1.65405e-09
AL606469.1	10.0974	0.252397	-5.32214	2.73686e-34	6.9831e-31
MRPL24	59.3809	125.81	1.08318	3.03115e-22	4.1029e-21
MARCKSL1P1	0.429241	1.1058	1.36523	0.000227176	0.000390066
AL355596.1	0.0178	0.890423	5.64454	1.2789e-08	3.551e-08
GIMAP1	17.5218	4.13351	-2.08371	4.15745e-31	5.58302e-29
ARL14	0.297381	7.86174	4.72446	5.57469e-05	0.000103079
AL512662.1	2.6103	0.847495	-1.62294	1.33588e-24	2.55318e-23
AL135960.1	0.781793	0.139231	-2.48931	1.3159e-24	2.51689e-23
MDK	59.3341	502.237	3.08143	4.54347e-26	1.14101e-24
RPS6P12	0.0696648	0.703647	3.33635	0.000206927	0.000356981
AJ011932.1	1.38434	0.475964	-1.54027	2.47287e-19	2.33082e-18
TFAP2D	0.0156	2.39459	7.26209	2.36939e-12	1.00893e-11
ZFAND2A-DT	1.99867	4.32022	1.11207	3.85914e-14	1.99891e-13
LRRC36	24.1518	3.19621	-2.9177	2.61471e-29	1.4992e-27
AC060764.1	0.955163	0.312797	-1.61052	1.56231e-12	6.77816e-12
GPR182	1.10895	0.364984	-1.60329	1.27829e-18	1.10002e-17
IMPA1P1	3.32988	0.64425	-2.36978	1.04078e-24	2.0225e-23
AC121757.1	1.91971	4.4056	1.19845	0.000154909	0.000271612
TMPRSS11A	0.0113111	0.268135	4.56715	6.8184e-08	1.75357e-07
C20orf85	157.472	28.703	-2.45583	1.43834e-14	7.83835e-14
DNAAF6	5.27483	1.03767	-2.34577	1.59898e-11	6.20784e-11
AC015983.1	0.0610778	0.495201	3.01929	8.57575e-07	1.94446e-06
APOBEC3B	2.03622	10.5139	2.36833	2.44634e-13	1.1574e-12
GYPC	57.5505	16.7603	-1.77978	8.08346e-32	1.89334e-29
IGKV4-1	234.265	1614.08	2.7845	1.0457e-14	5.7977e-14
EXOSC5	22.1982	50.9448	1.19849	1.51021e-21	1.8651e-20
WNT7A	11.1353	3.08718	-1.85078	3.10504e-26	8.16755e-25
PARD3B	11.1915	5.17783	-1.11199	2.27277e-18	1.90318e-17
FHDC1	26.5343	12.9224	-1.03798	4.14202e-19	3.78523e-18
LINC02253	0.0317704	1.0696	5.07325	0.0327418	0.0416268
MEPE	0.0959741	0.45766	2.25356	0.000323957	0.000545595
AC084876.2	0.155978	0.324924	1.05876	8.31821e-06	1.69628e-05
AL355355.1	0.753678	0.294643	-1.35498	1.05335e-16	7.27565e-16
PDX1	0.00397407	1.57858	8.63379	1.37541e-10	4.78308e-10
AC068580.3	0.333117	0.799156	1.26245	1.6401e-08	4.5081e-08
LINC01393	0.13017	0.556136	2.09504	2.97136e-11	1.11886e-10
ZNF485	1.97597	4.86367	1.29948	2.37454e-26	6.39772e-25
VSIG2	159.411	54.5677	-1.54663	1.64521e-23	2.64176e-22
AC008115.3	1.86465	4.88414	1.3892	1.1115e-11	4.41057e-11
AL139351.3	0.0436	0.368319	3.07855	6.06152e-14	3.06743e-13
MTX1P1	5.05273	11.7621	1.21902	6.14657e-16	3.88866e-15
SSTR1	16.4293	3.342	-2.29748	1.28497e-26	3.66331e-25
FAT1	16.2026	36.7813	1.18274	9.72047e-09	2.73358e-08
AP006545.1	0.180463	0.494187	1.45336	5.20357e-05	9.65805e-05
SAMHD1	82.0024	37.9605	-1.11117	6.74959e-25	1.34649e-23
AC024451.4	0.450272	1.40911	1.64592	3.12024e-07	7.44185e-07
SERPINA4	0.0169926	4.51443	8.05349	3.90779e-11	1.45409e-10
AC016575.1	0.105644	0.294264	1.4779	6.88023e-05	0.000125932
AL353801.1	0.178063	0.67214	1.91637	0.00437141	0.00632185
SYPL2	1.95264	0.945471	-1.04632	4.24353e-19	3.87383e-18
PERP	107.665	223.726	1.05518	5.19293e-11	1.90152e-10
Z99129.4	26.0873	9.26024	-1.49423	3.6761e-28	1.53261e-26
AP000344.1	0.35292	1.52101	2.10762	0.00298535	0.00441956
CCNF	2.32853	9.0017	1.95078	7.37721e-28	2.85196e-26
KRT89P	0.133081	0.397532	1.57876	5.10039e-06	1.06643e-05
SPOCK1	1.01417	9.5337	3.23273	2.46967e-11	9.4008e-11
IL17A	0.0252667	0.125769	2.31547	0.000252157	0.000430441
H3C10	2.05001	12.8146	2.64408	6.63046e-17	4.68762e-16
GAPDHP71	0.086813	0.291602	1.74802	1.56634e-08	4.31637e-08
EDRF1-AS1	0.189983	0.447128	1.23481	0.0298768	0.0382185
TRIM47	23.3543	47.9617	1.03819	7.95438e-13	3.55564e-12
SOX17	22.5376	3.32702	-2.76003	3.23308e-29	1.80903e-27
AL133334.1	0.0557444	0.258117	2.21113	0.000300515	0.000508194
LINC00887	0.0221037	0.352496	3.99525	1.3527e-18	1.16061e-17
TTC16	1.82882	0.630447	-1.53646	1.46233e-07	3.62387e-07
AC016999.1	0.234611	0.560456	1.25633	0.000428094	0.000709043
AL109840.2	0.101193	0.222191	1.1347	1.15486e-05	2.31707e-05
AC092354.1	1.08512	0.496894	-1.12685	8.38451e-13	3.73874e-12
CD93	212.119	45.648	-2.21625	9.37357e-30	6.32716e-28
AC073195.1	0.40028	0.893454	1.15838	4.66523e-10	1.5247e-09
AC009121.2	0.116093	0.63363	2.44836	2.90914e-16	1.90569e-15
AC096921.2	6.66757	1.95136	-1.77268	5.60182e-27	1.7283e-25
LRCH2	7.79618	3.39568	-1.19907	5.6854e-20	5.76104e-19
LINC01226	0.101115	0.324497	1.68221	0.00181756	0.00277232
HSPA7	6.45848	15.6518	1.27706	2.9604e-06	6.35119e-06
SLC52A1	1.38051	2.9228	1.08215	0.000613036	0.000995267
AP000812.2	0.740561	0.321015	-1.20598	4.95189e-18	3.98572e-17
LINC02570	2.04877	0.191667	-3.41808	2.24918e-32	9.79557e-30
TNFRSF18	3.54575	22.3071	2.65334	5.26208e-21	6.0752e-20
TNS4	1.77159	25.5635	3.85097	4.47161e-10	1.46499e-09
IGLV9-49	16.2237	110.737	2.77096	1.19821e-05	2.39941e-05
FRMD4B	20.7038	9.77525	-1.08269	1.08594e-23	1.79921e-22
AC092944.2	0.468163	0.137726	-1.76521	1.11284e-17	8.57569e-17
FAM13C	3.73793	1.1498	-1.70086	8.89742e-24	1.49551e-22
AC107884.2	0.49988	1.0626	1.08794	0.00292721	0.00433752
SNORD12C	0.743413	2.53332	1.76879	4.99482e-05	9.28885e-05
SASS6	2.44987	6.09054	1.31386	3.7939e-18	3.09764e-17
DNAJB4	37.8785	17.1734	-1.14121	2.06127e-20	2.2061e-19
Z98257.1	0.188831	13.9083	6.2027	1.1832e-23	1.9452e-22
AC138409.3	0.00528333	0.221168	5.38755	7.25609e-10	2.31743e-09
TBC1D3B	0.0599259	0.147353	1.29803	8.03067e-05	0.000145786
AC007610.2	0.123133	0.274354	1.15582	0.0238791	0.0310032
CCNA1	4.50411	2.01929	-1.15739	1.7047e-08	4.67844e-08
AC021491.2	0.0593074	0.193286	1.70445	2.07129e-08	5.62583e-08
IQSEC3	4.1395	0.71127	-2.54099	3.46381e-28	1.45364e-26
IGHV1-69D	46.7303	318.452	2.76865	1.95316e-12	8.38831e-12
NEK2	1.25716	18.2173	3.85707	8.17903e-31	9.23398e-29
AC037441.1	0.410719	0.201546	-1.02704	9.73466e-17	6.74945e-16
SNX2P1	0.155252	1.36198	3.13302	0.0117622	0.0159958
KCTD21-AS1	0.653983	1.33021	1.02433	4.16346e-10	1.37019e-09
PLPP2	7.95366	42.6418	2.42258	2.42043e-26	6.51447e-25
AC022239.1	0.262252	0.706391	1.42951	2.15886e-05	4.1828e-05
NPM1P12	0.0753296	0.178149	1.24179	0.00269073	0.00400735
LINC02588	0.0133963	0.559321	5.38377	4.42784e-07	1.03802e-06
CABYR	0.375441	9.21745	4.61771	9.42488e-25	1.84132e-23
RPL12P11	0.115415	0.682922	2.56489	0.00696179	0.00978139
WIF1	277.667	58.5764	-2.24496	1.31079e-27	4.69155e-26
TWIST2	8.80562	4.29892	-1.03445	5.17343e-21	5.97827e-20
VWA3B	6.57179	1.68332	-1.96497	1.80997e-08	4.95031e-08
SBSN	0.152787	3.63557	4.57259	7.1397e-09	2.0418e-08
SDHCP3	0.0910852	0.358762	1.97774	0.00371529	0.00542838
PHBP3	0.0578519	0.118535	1.03487	0.00268487	0.00399956
AC138474.1	0.45772	0.183487	-1.31879	2.22808e-23	3.52664e-22
S100A12	20.5531	4.94442	-2.05548	8.10409e-20	8.04575e-19
PDZK1P1	0.306594	0.638813	1.05906	4.22587e-05	7.92234e-05
RNF157	0.652135	1.92843	1.56419	1.91709e-06	4.194e-06
AC009148.1	0.12258	0.526459	2.1026	6.81745e-15	3.85607e-14
FCN3	359.359	15.2676	-4.55688	1.4462e-30	1.40839e-28
AC087588.1	0.269063	0.984701	1.87174	2.5828e-05	4.96273e-05
AC018695.6	0.312241	0.95411	1.6115	0.000228458	0.00039203
AC020978.1	0.222389	0.609247	1.45394	0.00130588	0.00203019
AC007877.1	4.29221	1.23019	-1.80284	9.88749e-26	2.29345e-24
AC103563.3	0.844939	4.20035	2.31359	1.30157e-08	3.6121e-08
PGK1P1	0.245387	0.529947	1.11079	0.000664532	0.00107252
AC025575.2	0.154254	5.3638	5.11988	2.45269e-05	4.72518e-05
THEMIS2	72.3803	34.6418	-1.06308	2.90131e-22	3.93342e-21
GOLGA2P11	0.0229889	0.175596	2.93325	2.73346e-05	5.23527e-05
RPL7P28	0.0480056	0.248918	2.37439	4.74359e-07	1.10836e-06
ZPBP2	0.0158185	0.339386	4.42324	0.000103656	0.000185676
RPS3AP34	1.65214	0.810778	-1.02696	7.54462e-12	3.04301e-11
NUP62CL	2.32906	6.3723	1.45207	4.10522e-14	2.11991e-13
AC244197.2	0.444909	0.917467	1.04415	0.000477607	0.000786356
AC006230.1	0.358394	1.43927	2.00571	2.43462e-16	1.60764e-15
PDZRN3	12.09	5.65549	-1.09609	2.16741e-18	1.82333e-17
ITGB4	38.6413	119.387	1.62743	1.3741e-08	3.80509e-08
AL031600.2	0.107254	0.453173	2.07904	0.00232225	0.00349302
LMX1B	0.179367	0.809826	2.1747	0.00705777	0.00990698
CLDN6	0.760204	46.2754	5.92772	0.000300677	0.000508435
AC102953.2	1.87111	3.9331	1.07177	0.000342029	0.000574249
BX119927.1	0.0142241	0.37741	4.72973	4.66776e-10	1.52533e-09
ADGRD1	19.7218	8.18666	-1.26844	1.9278e-20	2.06932e-19
RBBP4P2	0.253585	0.526694	1.0545	0.00221634	0.00334183
AC073534.2	0.858646	2.00489	1.22339	0.00920664	0.0127238
AC244033.1	0.11072	0.583552	2.39794	4.03577e-10	1.33057e-09
IL27	1.33703	0.640197	-1.06244	1.11455e-12	4.89969e-12
MIR34AHG	1.91279	4.73536	1.3078	5.53568e-09	1.60376e-08
VDAC1P11	0.0684204	0.230392	1.75159	0.000604993	0.000982883
PCBP2-OT1	0.247615	0.647575	1.38695	0.000249041	0.00042532
AC104162.1	0.966974	0.311112	-1.63604	2.58907e-14	1.36799e-13
ENC1	16.9104	41.0649	1.27999	9.41113e-15	5.23604e-14
BCAS2P2	0.294343	1.42104	2.27138	0.000444254	0.000733998
ODF3L1	7.86502	1.50388	-2.38676	2.71946e-24	4.93506e-23
SLF1	3.08651	6.23484	1.01437	9.22107e-09	2.60031e-08
CAD	12.9947	29.3582	1.17584	5.57036e-18	4.45821e-17
LPO	0.0435537	0.238199	2.4513	9.92848e-08	2.50544e-07
VSIG1	4.48604	54.2602	3.59638	1.1335e-06	2.53874e-06
AC044810.2	1.15641	0.129215	-3.1618	1.54936e-30	1.47507e-28
GPR78	0.0116889	0.271069	4.53545	8.20518e-14	4.09938e-13
CCDC54	0.452331	0.0991238	-2.19008	4.25287e-23	6.45904e-22
AL365436.2	0.330869	1.0639	1.68504	1.08487e-08	3.03913e-08
AC087683.2	0.578424	1.37236	1.24646	0.0232586	0.0302545
AC005534.1	0.544204	1.2684	1.22079	0.000981551	0.00155198
AL592148.2	0.0421685	0.486049	3.52686	9.93406e-08	2.5066e-07
BHMT	0.115696	1.59429	3.78449	0.039082	0.0490157
NKD1	8.9283	2.80332	-1.67125	1.849e-24	3.4461e-23
AC055807.1	0.0644222	0.87584	3.76504	0.000115446	0.000205597
COL24A1	0.359456	1.47037	2.03229	7.07994e-21	8.03937e-20
OCIAD2	33.304	155.057	2.21903	2.55104e-30	2.26794e-28
ELMOD1	0.660343	0.211945	-1.63953	2.89196e-21	3.4529e-20
STAG3	0.940065	2.26299	1.2674	0.00261242	0.00389801
RPL7L1P8	0.0231037	0.113787	2.30015	2.13601e-06	4.65297e-06
CFAP58	4.14354	1.0595	-1.96748	1.95482e-16	1.30228e-15
VSIG10L	2.44609	9.40713	1.94328	2.88574e-05	5.50996e-05
LINC00683	0.528239	0.224646	-1.23354	1.2073e-14	6.64025e-14
AL592494.2	0.567519	2.00874	1.82355	3.06065e-09	9.12509e-09
COL4A2-AS1	1.3236	0.494961	-1.41908	8.40818e-11	3.00511e-10
LINC01785	0.886313	0.311157	-1.51017	5.65697e-34	1.20281e-30
KIAA1549L	0.16422	0.760551	2.21141	0.00078664	0.00125822
AC018816.2	0.0937148	0.646744	2.78685	0.000523957	0.000858693
AC010761.4	0.439941	1.43471	1.70537	5.46944e-13	2.4889e-12
AL109984.1	0.288931	0.817417	1.50035	8.33609e-05	0.00015103
AC084048.1	0.0907648	0.286662	1.65915	1.1749e-06	2.6264e-06
COL18A1	30.9754	62.6895	1.0171	2.96481e-08	7.92281e-08
KNSTRN	6.94376	15.1846	1.12882	2.32392e-14	1.23556e-13
CALML3-AS1	0.0431259	0.588549	3.77053	3.49738e-16	2.277e-15
PDLIM1	443.325	211.764	-1.06591	1.84179e-25	4.05463e-24
AL450384.1	0.404313	0.982043	1.28031	0.0119719	0.0162645
CRABP1	0.126541	9.4625	6.22455	1.35536e-10	4.71593e-10
AC243829.4	1.79306	0.850105	-1.07671	1.33623e-07	3.32202e-07
EPHB2	2.27129	11.4027	2.32779	1.01469e-17	7.85728e-17
ZNF107	3.12141	8.15867	1.38614	5.44842e-19	4.89496e-18
CEND1	0.259863	0.709769	1.4496	2.70889e-05	5.19132e-05
SYNPR	0.00458889	0.209118	5.51003	4.77022e-11	1.75479e-10
AC128709.1	0.902246	0.333626	-1.43529	1.26585e-19	1.23417e-18
WASHC5-AS1	0.337498	1.01392	1.58699	1.0207e-05	2.06038e-05
AL157931.1	0.0916241	1.24189	3.76067	8.25286e-12	3.31923e-11
CACNA1S	0.819122	0.0826836	-3.30841	2.95488e-28	1.25895e-26
PCOLCE2	33.6604	6.92576	-2.28101	6.04234e-26	1.47533e-24
STMND1	6.16395	1.97825	-1.63963	1.33518e-07	3.31973e-07
ACACB	8.3163	3.22617	-1.36612	3.58793e-21	4.23824e-20
LINC02827	0.0441296	0.36938	3.06529	8.94833e-14	4.45148e-13
IER5L	3.96483	12.7248	1.68231	2.69127e-16	1.76888e-15
DNAAF3	4.06794	1.73917	-1.2259	0.000867801	0.00138033
AC011447.7	1.14974	4.45529	1.9542	0.00354805	0.00519502
TDRD5	0.229396	3.20908	3.80625	1.65063e-08	4.53639e-08
ADARB1	25.9955	7.62239	-1.76995	3.64962e-26	9.37766e-25
AC245884.3	2.06142	6.54529	1.66682	2.48742e-10	8.39393e-10
AP000944.5	0.356154	0.101804	-1.80671	6.29006e-16	3.97648e-15
MIR23B	4.58187	2.11598	-1.11461	4.90337e-07	1.14328e-06
H3C6	1.26922	4.51015	1.82923	7.1223e-06	1.46281e-05
TPSB2	123.985	33.1861	-1.90152	3.98145e-20	4.11615e-19
CARD17	0.155793	0.585715	1.91057	6.43707e-10	2.07245e-09
AC107959.4	0.121041	1.39425	3.52592	6.01117e-25	1.20768e-23
ADGRA1	0.503846	0.107334	-2.23088	2.4995e-18	2.08687e-17
C7orf77	0.288428	0.13863	-1.05698	1.047e-09	3.28709e-09
TUBA4B	18.0934	3.30029	-2.4548	9.69599e-13	4.29428e-12
SNRPA1P1	0.174376	0.436611	1.32415	0.000122536	0.000217345
AL360181.3	0.272548	0.567265	1.05751	7.13186e-09	2.03979e-08
AL121658.1	0.386502	0.903846	1.2256	1.29218e-09	4.01241e-09
LINC01852	3.54383	1.52728	-1.21434	3.95038e-27	1.26626e-25
AL139246.4	0.17045	0.399168	1.22765	0.00429315	0.00621467
RN7SL381P	1.73204	7.1071	2.03679	5.81364e-06	1.20647e-05
TRPC3	0.592648	0.245762	-1.26992	7.1095e-21	8.06934e-20
LINC02468	0.0901148	0.76566	3.08687	0.00143988	0.00222604
AC004975.2	0.65198	1.40844	1.1112	0.000122219	0.000216828
LINC01348	0.372422	2.40757	2.69257	3.41576e-15	1.9939e-14
Z99943.1	0.158939	0.853622	2.42512	2.49084e-07	6.01039e-07
IL17REL	0.164113	0.887484	2.43503	6.54303e-10	2.10312e-09
DOCK3	0.549661	1.84469	1.74677	6.82955e-06	1.40495e-05
AC007639.1	0.0376426	0.84998	4.49699	6.72182e-20	6.74428e-19
AP000845.1	0.166854	0.338573	1.02088	2.69512e-06	5.80893e-06
FOXA1	23.6314	65.7941	1.47726	3.52391e-13	1.63686e-12
IGKV1D-27	2.85014	12.732	2.15936	1.50333e-08	4.14988e-08
TUBB4A	0.380391	1.96184	2.36665	0.0114087	0.0155506
LARP1P1	0.0799519	0.635182	2.98997	3.99619e-11	1.48418e-10
CSMD2	0.171183	0.651896	1.9291	2.74706e-11	1.03947e-10
IL4I1	6.35486	25.1843	1.98659	1.16987e-14	6.44973e-14
LINC01502	0.0451481	0.284817	2.6573	0.00312964	0.0046195
VIPR1	61.1719	6.31087	-3.27696	2.17194e-28	9.57118e-27
PAH	0.0357	2.43953	6.09453	4.43137e-10	1.45311e-09
ST8SIA2	0.0370796	0.393262	3.40679	6.90712e-09	1.97795e-08
LDHAP3	0.86795	2.34549	1.43421	1.2268e-07	3.0664e-07
AL596087.2	0.0361926	0.24194	2.74088	1.25641e-11	4.95019e-11
GRK5	58.6965	9.96261	-2.55868	5.40853e-32	1.64284e-29
PPIAP71	0.110574	0.278997	1.33524	0.030452	0.0389056
AC091799.1	0.0857907	0.292739	1.77072	9.29884e-07	2.10113e-06
AC005224.3	0.665933	1.40595	1.0781	0.000125638	0.000222476
IGHV3-42	0.136	0.720863	2.40612	9.05896e-09	2.56025e-08
OR13Z2P	0.00751667	0.483661	6.00776	5.69668e-11	2.07602e-10
AC093904.3	0.0125315	0.137668	3.45756	2.21645e-08	5.99903e-08
HTR3C	6.48422	0.263353	-4.62186	8.08833e-32	1.89334e-29
ACRP1	0.075913	0.211624	1.47909	0.00852915	0.0118433
MSL3P1	0.0309722	0.208371	2.75011	1.92877e-17	1.44488e-16
ADRB1	37.0904	4.10113	-3.17696	2.76989e-30	2.39584e-28
FABP5P7	6.96405	2.02546	-1.78168	8.91312e-23	1.29805e-21
PRKCA-AS1	0.0156778	0.667652	5.4123	0.0186217	0.0245382
TEKT3	2.62147	0.66252	-1.98434	2.66868e-14	1.40859e-13
ATP8B5P	1.34958	0.487583	-1.46879	4.01048e-15	2.32567e-14
LINC00427	0.174365	0.528494	1.59978	0.0201686	0.0264576
TXNRD1	70.7189	219.018	1.63088	0.00048286	0.000794748
SCN8A	0.141281	1.08831	2.94544	4.76318e-18	3.84236e-17
AC091053.2	0.116541	0.444832	1.93243	0.0106811	0.0146159
BTBD11	0.615948	2.23145	1.8571	0.000350307	0.000587106
IGKV3D-11	5.73539	32.0952	2.48439	5.37244e-13	2.44913e-12
SNTG2	0.269148	0.128761	-1.0637	9.62436e-13	4.26551e-12
AC061708.1	1.60446	0.522257	-1.61926	1.04579e-17	8.07851e-17
AC002331.1	0.0106056	0.173469	4.03179	1.83286e-08	5.00754e-08
OSCAR	83.5617	18.4493	-2.17928	1.29849e-29	8.34535e-28
SLC25A39P1	0.0552759	0.627994	3.50603	0.000964809	0.00152702
AL445438.1	0.409217	0.0846343	-2.27355	1.03238e-22	1.49411e-21
AL390957.1	0.0906019	0.243463	1.42609	0.0047992	0.00689919
PDXDC2P-NPIPB14P	0.715465	1.69567	1.2449	1.59568e-07	3.93408e-07
CPB2	22.7148	3.38742	-2.74538	8.81748e-28	3.30364e-26
SNORD9	0.847924	4.06418	2.26096	0.0117281	0.0159536
AL845472.1	0.131939	0.291012	1.14121	0.00827068	0.0115089
MROH3P	0.0272981	0.782282	4.84081	3.90931e-20	4.04486e-19
IL17D	4.22939	1.36839	-1.62797	5.13386e-27	1.59942e-25
CCDC74B	2.32464	0.969304	-1.26198	2.80737e-05	5.37041e-05
WDR87	0.0228019	0.43401	4.25051	0.0255499	0.0330213
AP000553.4	0.347069	3.02082	3.12165	1.01485e-13	5.0085e-13
KRT8P36	0.348761	0.763603	1.13058	3.31362e-06	7.07328e-06
DTHD1	7.04243	1.88379	-1.90244	7.8513e-13	3.51264e-12
LINC00706	0.0634185	0.334395	2.39858	0.000104564	0.000187251
ACOXL	9.45156	3.2761	-1.52857	3.75365e-25	7.7613e-24
EPS15-AS1	0.493883	1.13441	1.19969	9.53289e-05	0.000171386
COX7A1	104.587	26.1477	-1.99995	2.37358e-30	2.14e-28
AP000842.3	0.0196944	0.241142	3.61402	9.3615e-07	2.11454e-06
IGHV1-69	22.5861	121.044	2.42202	2.65393e-09	7.95817e-09
CFAP73	11.3697	2.84256	-1.99993	1.55303e-10	5.36325e-10
AC080112.4	0.940298	0.37554	-1.32415	6.72013e-17	4.74839e-16
AC090579.1	0.92573	1.93461	1.06338	6.30789e-05	0.000115856
PPP1R17	0.862515	0.109977	-2.97135	1.32317e-17	1.01019e-16
CYP4F11	1.46208	11.1159	2.92653	0.021546	0.028146
DEPTOR	12.1599	37.0819	1.60858	1.4103e-15	8.60035e-15
IGHD3-3	2.09938	10.4314	2.3129	7.95335e-08	2.02991e-07
AC105749.1	1.67066	0.827626	-1.01337	2.33652e-15	1.38744e-14
MIR378D2HG	0.0476593	0.198532	2.05854	4.87725e-07	1.13771e-06
LRRC69	0.5388	1.08134	1.00499	3.23606e-06	6.91467e-06
H2BC6	0.180667	1.84186	3.34976	8.35519e-25	1.64117e-23
GTF3C2-AS1	0.0797148	0.26986	1.75929	1.83682e-07	4.50162e-07
AL049747.1	0.0601704	0.169768	1.49644	0.00376113	0.00549126
CRLF1	9.04113	154.468	4.09466	8.76762e-05	0.000158342
LINC02880	0.664207	0.136766	-2.27993	2.492e-19	2.34625e-18
IGKV2-28	2.41324	17.1568	2.82974	1.46539e-11	5.72141e-11
AC130650.2	0.747572	2.0108	1.42749	0.00312139	0.00460787
RN7SL153P	0.0566167	0.374645	2.72622	4.39019e-06	9.24757e-06
SGPL1	25.3792	53.4242	1.07385	5.58316e-22	7.30535e-21
Z95331.1	0.0760315	0.333962	2.13502	7.99379e-09	2.27112e-08
RASIP1	44.4263	8.62159	-2.36539	5.33954e-31	6.88072e-29
LUNAR1	0.0846574	0.170611	1.011	0.00633025	0.00894678
EML1	15.2164	4.69108	-1.69764	1.70792e-27	5.93701e-26
AC091212.1	0.128854	0.706568	2.45509	8.25041e-06	1.68327e-05
AL451050.2	0.305828	0.802828	1.39237	3.76309e-09	1.11013e-08
PTX3	18.8343	4.65258	-2.01726	2.02989e-14	1.08489e-13
AC100793.4	2.92508	0.606285	-2.27041	1.13397e-26	3.28786e-25
KCNQ5	0.320946	2.31869	2.85291	1.88916e-09	5.76096e-09
AL353768.1	0.106615	0.37516	1.8151	0.00110936	0.00174165
AC104458.1	0.336915	0.089397	-1.91409	7.67448e-14	3.84563e-13
LINC02398	0.155885	2.25851	3.85682	2.79009e-08	7.47001e-08
HSPA12B	44.8097	6.19388	-2.8549	3.01725e-32	1.06924e-29
PPIAP47	0.0635241	0.157072	1.30605	0.000279877	0.000474867
GLRA3	0.0471796	0.798907	4.08179	2.17354e-10	7.3806e-10
TMTC4	6.62556	15.5541	1.23118	8.48227e-20	8.40812e-19
CDKN2B	53.8406	22.4471	-1.26216	3.94603e-19	3.61649e-18
TDRD12	0.142189	0.761233	2.42053	0.0039815	0.0057941
PLAC9P1	0.97063	0.136066	-2.83461	1.34079e-26	3.79961e-25
AL449423.1	0.115067	0.32401	1.49357	0.010261	0.014078
LINC02696	0.259515	0.124769	-1.05656	1.14965e-12	5.04444e-12
AURKAP1	0.0413463	0.116328	1.49237	0.000173528	0.000302306
AC004461.1	0.240174	0.606047	1.33535	7.13366e-06	1.46491e-05
TMEM255A	6.34672	3.09417	-1.03646	4.48629e-17	3.23263e-16
GPC5-AS1	2.04105	0.567065	-1.84773	1.45911e-13	7.06703e-13
ACSBG1	0.727337	0.2368	-1.61896	1.14111e-08	3.18935e-08
MIR7111	1.77826	4.2793	1.26691	5.53948e-08	1.43784e-07
AC136632.2	0.710507	1.50771	1.08544	4.81773e-11	1.77073e-10
TRBV23-1	0.364556	0.892273	1.29135	8.64847e-05	0.000156323
AC243732.1	0.632365	1.52994	1.27464	6.61988e-09	1.89868e-08
IGKV3OR2-268	2.66454	15.0146	2.4944	3.46538e-13	1.61173e-12
AL391422.2	0.347924	0.113467	-1.61649	1.74121e-07	4.27757e-07
PCDH7	2.26666	7.97777	1.81541	9.47607e-05	0.000170437
ADGRF4	0.284219	6.69155	4.55727	1.36768e-18	1.17235e-17
AC245297.1	14.6434	6.13804	-1.2544	1.19461e-18	1.03289e-17
B4GALT2	17.1472	40.0178	1.22267	2.45848e-24	4.49342e-23
SYNPO	130.271	38.7223	-1.75028	1.69321e-28	7.70095e-27
NRBF2P2	0.0556556	0.118806	1.09401	0.00398425	0.00579745
LINC00355	0.0331852	0.777366	4.54998	4.28243e-07	1.00604e-06
IGHD3-9	1.58829	6.58786	2.05234	1.94265e-07	4.74596e-07
LY86	69.6772	26.429	-1.39857	1.78218e-24	3.32642e-23
AC093535.1	0.328869	0.98693	1.58544	3.49529e-05	6.61151e-05
CCT5	50.2948	125.288	1.31677	9.8107e-22	1.23256e-20
TTC39C	5.13514	14.5806	1.50557	8.67281e-21	9.71408e-20
AC024884.1	0.0823296	0.287836	1.80576	6.17537e-06	1.27738e-05
AL158214.2	0.213287	0.620709	1.54112	5.42537e-13	2.46973e-12
STON1	7.88005	3.55621	-1.14787	2.11137e-21	2.55679e-20
PRKAA2	2.20172	5.3437	1.27921	1.24831e-05	2.49476e-05
TBXA2R	6.73574	3.25569	-1.04887	3.67248e-16	2.38492e-15
CENPM	4.72079	16.4961	1.80502	1.30522e-19	1.26819e-18
Z94721.3	0.132887	0.512149	1.94636	1.14215e-05	2.29391e-05
CHGB	0.505213	23.4262	5.53509	0.00420127	0.00609079
AC022613.1	1.48398	4.23779	1.51384	3.41457e-05	6.46791e-05
MESP2	0.292319	2.73371	3.22525	8.65275e-18	6.76187e-17
PGAM1P11	0.0967593	0.25082	1.37418	0.0176618	0.0233626
NPR1	56.8676	9.27312	-2.61648	6.7837e-31	8.01324e-29
HOXB-AS4	0.0372833	0.892216	4.58079	2.8051e-07	6.73112e-07
CAPN12	1.41091	4.57139	1.69601	1.11661e-13	5.48208e-13
SNORD72	0.771604	3.93725	2.35126	1.38268e-11	5.4167e-11
AC092844.1	0.0116722	0.13742	3.55744	4.62505e-15	2.66564e-14
PDC	0.108681	0.389212	1.84045	0.00998371	0.0137249
MT-TV	0.883189	7.43528	3.07359	0.0288654	0.0370194
TOM1L2	50.5575	19.5736	-1.36901	3.43026e-26	8.92183e-25
BTG4	0.52393	0.246908	-1.0854	0.0012182	0.00190037
CPAMD8	29.4236	9.85801	-1.5776	4.89978e-22	6.46756e-21
GIPC3	8.72386	3.65063	-1.25682	3.89965e-18	3.1789e-17
H2AC6	51.5223	117.022	1.18351	3.35598e-07	7.97651e-07
AC138207.7	0.207215	0.456604	1.13982	0.00368331	0.00538319
ISL1	0.0711167	1.34581	4.24214	0.00526149	0.00751536
LINC01136	0.104487	0.385731	1.88427	6.17968e-12	2.51194e-11
KCTD12	169.046	68.5591	-1.302	1.1831e-25	2.68804e-24
OVAAL	0.0204074	0.186422	3.1914	0.000633597	0.00102623
AL353708.3	0.255793	0.814024	1.6701	6.59607e-14	3.32804e-13
AL137186.3	0.35183	1.18611	1.75329	4.23814e-05	7.94419e-05
MYZAP	19.5213	1.82486	-3.41919	2.07857e-32	9.64902e-30
MCM8-AS1	0.0673222	0.177286	1.39693	0.0039242	0.00571625
AC004156.1	0.0816852	0.295016	1.85264	5.07022e-15	2.91435e-14
CDC20P1	0.77437	0.320229	-1.27392	9.29445e-14	4.61377e-13
B3GAT1-DT	0.391837	3.03317	2.9525	6.20825e-06	1.28408e-05
AL353697.1	0.0825537	0.325286	1.9783	0.0145656	0.0195323
PCDHGB9P	0.166037	0.466504	1.49038	0.0167155	0.0221936
IGLC7	24.2367	86.6773	1.83846	1.85856e-06	4.07293e-06
SLC39A8	344.732	63.071	-2.45043	1.41536e-32	8.47406e-30
FAM83F	0.434819	2.25426	2.37417	0.000119615	0.000212504
FOXP4-AS1	1.18262	2.51906	1.0909	0.000407475	0.000677355
HPCA	0.134544	0.879877	2.70922	5.11632e-22	6.74492e-21
AC024937.3	0.108843	0.397137	1.86739	7.30171e-12	2.94784e-11
FBXL7	12.9044	6.30381	-1.03357	8.48689e-18	6.63836e-17
AC010643.1	0.501172	1.63753	1.70815	0.00114213	0.00178902
AC005865.2	0.141274	0.845676	2.58161	4.88563e-17	3.51245e-16
AL590705.3	1.83944	4.95644	1.43004	0.000131468	0.000232317
ANXA3	144.222	38.3987	-1.90916	2.24637e-29	1.31158e-27
AC135782.1	0.0105889	0.128303	3.59893	2.38641e-07	5.76985e-07
POU4F1	0.018287	0.824521	5.49466	1.52232e-13	7.35645e-13
SYT7	3.10493	33.127	3.41537	3.20711e-24	5.75452e-23
AC091390.2	1.28959	2.99349	1.21492	8.52284e-06	1.73566e-05
AC008750.2	0.0868796	0.366792	2.07787	3.03867e-06	6.51035e-06
IGKV2D-28	2.08039	16.1821	2.95947	5.78747e-10	1.86897e-09
PNPLA6	85.114	29.3771	-1.5347	4.22123e-30	3.34487e-28
C16orf74	1.53509	4.63373	1.59385	0.00104065	0.00163964
POLR3GP1	0.280926	1.27048	2.17711	7.07346e-06	1.45337e-05
AC243772.2	0.149139	0.407244	1.44924	7.84017e-06	1.60354e-05
RHOJ	32.6625	8.73968	-1.90198	5.45393e-30	4.14158e-28
AC243830.1	0.0303315	0.318471	3.39227	4.19425e-17	3.03334e-16
AL606490.8	0.0059537	1.19913	7.65398	1.10953e-17	8.55534e-17
MAB21L3	0.248531	0.844816	1.76521	0.000115071	0.000204959
AC003005.2	0.0712352	0.231527	1.70052	0.0067356	0.00947455
AL033397.2	0.120354	2.04108	4.08398	1.00395e-14	5.57833e-14
PACSIN1	0.33423	2.01828	2.59421	1.18481e-17	9.10554e-17
LBP	0.563994	14.5806	4.69222	0.00403205	0.00586176
AP000593.3	0.29837	0.946463	1.66544	3.0218e-08	8.06331e-08
LINC01934	0.114678	0.244892	1.09456	0.0377937	0.0475121
DCHS1	14.7485	7.18416	-1.03768	3.89112e-13	1.79891e-12
AC106037.2	0.552102	1.25811	1.18825	2.97048e-07	7.10059e-07
THRB	6.51	3.13967	-1.05204	6.09789e-19	5.44205e-18
SIRPD	1.2308	0.290704	-2.08197	1.50082e-25	3.35612e-24
AC093281.2	0.0165074	0.788484	5.5779	1.51952e-11	5.91736e-11
AC104695.3	2.26617	7.94393	1.80959	0.0165346	0.0219763
FBXO16	1.00843	2.52012	1.32138	3.69093e-18	3.0184e-17
PROK2	2.54347	0.601886	-2.07924	6.20685e-15	3.5279e-14
AC082651.3	0.572891	0.224812	-1.34954	3.90005e-13	1.80271e-12
AL137785.1	0.0663815	0.764387	3.52545	1.69144e-07	4.16173e-07
SPRR1B	0.628863	48.9153	6.2814	1.52966e-11	5.95321e-11
SPTBN1	233.859	69.734	-1.7457	5.3889e-27	1.67069e-25
EFR3B	6.79394	3.27128	-1.05439	1.50533e-16	1.01691e-15
GAL	0.237041	8.70488	5.19862	1.78462e-15	1.07469e-14
RNU6-658P	0.802767	1.87475	1.22365	0.000516273	0.000846847
IGLV4-60	10.5503	57.7253	2.45192	3.29906e-06	7.04338e-06
VPS37D	2.74686	7.92094	1.52789	4.04831e-13	1.86786e-12
MAP3K8	40.6478	18.9707	-1.0994	8.73049e-16	5.43711e-15
MCC	10.117	4.46166	-1.18113	1.56585e-18	1.33487e-17
ERICH3	7.4005	1.65809	-2.1581	1.69047e-12	7.31303e-12
ANXA8L1	9.27719	1.66793	-2.47563	1.3667e-26	3.86174e-25
TRAF4	26.6079	67.8034	1.3495	2.60632e-25	5.56953e-24
AC006064.3	0.232269	1.06526	2.19734	5.57129e-15	3.18368e-14
MXD3	1.78668	4.76336	1.4147	1.62639e-17	1.22995e-16
ITGA11	2.0442	14.4774	2.82419	6.38838e-22	8.26151e-21
ZNF730	0.282463	1.06483	1.91449	0.0362432	0.0457094
AL022316.1	0.530019	1.85692	1.8088	1.22937e-09	3.82763e-09
NDC80	1.28364	12.3423	3.2653	6.35879e-30	4.58318e-28
AL158166.1	2.88301	6.39168	1.14862	0.00292397	0.00433299
PKHD1L1	2.86135	0.72492	-1.9808	2.46708e-26	6.62634e-25
ARNTL2-AS1	0.0228037	0.327501	3.84416	7.69146e-08	1.96641e-07
AL953883.1	0.0435019	0.663899	3.93182	1.34335e-05	2.67274e-05
ADAMTSL5	1.29007	3.68167	1.51291	3.82289e-08	1.00849e-07
COBLP1	0.00890741	0.297045	5.05953	2.61687e-12	1.10894e-11
LINC01948	0.455806	1.02124	1.16383	4.46976e-06	9.4074e-06
IL11	0.346409	2.34489	2.75897	2.45397e-17	1.81804e-16
PPP4R4	3.7823	1.18043	-1.67995	1.29324e-21	1.60961e-20
AC105250.1	0.111985	0.305919	1.44984	2.10767e-05	4.08766e-05
COL10A1	2.46753	57.3499	4.53865	2.48572e-29	1.43816e-27
SNX25	53.0403	24.3563	-1.1228	1.87234e-21	2.28578e-20
BX322650.1	0.148556	0.472752	1.67008	3.81923e-06	8.09837e-06
PYCR1	7.50573	100.218	3.73901	4.28369e-32	1.40126e-29
AC068870.2	23.0518	9.29252	-1.31074	6.47505e-24	1.11478e-22
CAPN5	7.97442	29.2603	1.87549	5.69921e-13	2.59023e-12
AC010894.2	0.0541019	0.517883	3.25888	0.00964153	0.0132874
NLRP7	0.15105	0.659982	2.1274	1.21774e-05	2.43653e-05
MET	56.6138	153.585	1.43981	0.00108088	0.00169903
IFITM3P8	0.0777759	0.208833	1.42495	0.000991597	0.00156699
LINC00592	0.127419	0.529904	2.05616	1.86492e-06	4.08546e-06
MZB1	15.0688	59.6156	1.98412	6.08521e-13	2.7578e-12
MT1P1	0.558478	1.17199	1.06939	6.82603e-06	1.40434e-05
CD34	56.203	17.4699	-1.68578	2.42786e-27	8.16163e-26
LYSMD1	8.17681	16.6799	1.0285	7.94696e-19	7.00403e-18
LINC01515	0.227417	0.793958	1.80373	4.77353e-14	2.44573e-13
TFR2	0.29445	2.58542	3.1343	6.55684e-30	4.68621e-28
NIPSNAP1	33.3301	73.0514	1.13209	6.14346e-22	7.96901e-21
LCT	0.0414815	0.770979	4.21615	4.30071e-07	1.00987e-06
FAM183DP	0.73707	0.176388	-2.06305	4.34593e-12	1.79602e-11
PRLH	0.984278	0.199045	-2.30597	5.89901e-09	1.70264e-08
H4-16	0.942604	2.42501	1.36327	3.56693e-06	7.58988e-06
CCNE2	0.832915	3.41486	2.03559	9.35477e-23	1.35849e-21
IGHJ1	3.2351	26.3589	3.02641	9.06875e-13	4.02976e-12
SYNPR-AS1	1.34203	5.60986	2.06354	8.24513e-10	2.61595e-09
MIR3605	1.31564	2.65283	1.01177	0.00434389	0.00628456
VN1R48P	0.0776019	0.289472	1.89926	0.000149543	0.000262529
AL442636.1	0.0192444	0.182969	3.24908	0.0150508	0.0201407
TEDC2	0.642785	7.6028	3.56412	7.58706e-32	1.86138e-29
AC025171.3	0.537019	1.24553	1.21372	2.55381e-05	4.90928e-05
CIBAR2	24.9455	5.56516	-2.16428	1.08544e-10	3.82324e-10
SALL3	0.00844815	0.379176	5.48809	9.31643e-07	2.10492e-06
GLIPR1L2	1.52912	0.620121	-1.30208	1.95192e-15	1.16909e-14
AC009962.1	1.04503	0.362568	-1.52723	2.69309e-25	5.74533e-24
KIF4A	1.02026	15.6996	3.94372	5.86417e-31	7.19347e-29
AC116562.3	0.101693	0.353667	1.79818	0.00586434	0.00832565
ALDH2	147.652	64.0158	-1.2057	2.32903e-25	5.02751e-24
RTEL1	0.181209	0.400262	1.14329	7.92623e-10	2.5201e-09
SPRR2D	0.363493	12.649	5.12096	0.010054	0.0138126
SIRPA	92.1537	39.4559	-1.2238	7.62568e-24	1.29368e-22
RNU6-45P	0.309081	1.17827	1.93061	1.51539e-06	3.3549e-06
IL12B	0.481061	0.987482	1.03753	0.00950484	0.0131055
WDHD1	2.52896	9.42088	1.89732	1.31299e-23	2.14063e-22
AC245041.2	14.57	2.48653	-2.5508	1.15033e-28	5.4353e-27
SCAI	7.75638	3.66843	-1.08022	1.25285e-19	1.22243e-18
NANOGP7	0.116378	0.574778	2.30419	1.21568e-08	3.38477e-08
MTARC2	59.5078	21.3334	-1.47997	1.06949e-28	5.10058e-27
SERTM2	1.01759	0.488473	-1.0588	7.42345e-08	1.9017e-07
LINC00501	0.0196148	1.02556	5.70832	2.57578e-11	9.77699e-11
AL451142.1	0.134981	0.298137	1.14321	0.0029626	0.00438715
AC091563.1	7.38673	15.1673	1.03796	1.90311e-07	4.65514e-07
AC027601.5	0.249859	0.839301	1.74807	8.9887e-16	5.59518e-15
NLRP14	0.234824	0.116434	-1.01207	4.13832e-13	1.90766e-12
NETO2	4.93286	13.1498	1.41454	1.99494e-14	1.068e-13
AC005821.2	0.169494	0.452186	1.41568	0.000197059	0.000340902
LINC01376	1.02672	2.15741	1.07125	8.72427e-08	2.21383e-07
NXPH4	0.49273	9.1661	4.21744	2.70062e-17	1.99272e-16
MSH5	0.434344	1.35596	1.6424	1.50571e-12	6.5404e-12
AC022028.2	0.0184296	0.13893	2.91425	9.72618e-08	2.45706e-07
SNORD59A	1.29867	2.61688	1.01081	0.00114665	0.00179578
AP001469.2	0.879578	2.02268	1.20139	2.45159e-07	5.92015e-07
NUDT8	7.7752	19.3602	1.31614	9.74598e-19	8.49859e-18
RS1	3.60344	0.232809	-3.95216	1.92106e-32	9.64902e-30
DSCC1	3.09697	10.9581	1.82307	4.62259e-20	4.73676e-19
PRC1	0.0415019	0.155934	1.90968	3.54769e-18	2.91152e-17
AL121899.1	1.17962	0.432249	-1.44839	0.000515082	0.000845166
LINC01081	0.781976	0.186171	-2.0705	1.05218e-25	2.42734e-24
AC099795.1	0.0176815	0.216281	3.6126	2.05609e-10	6.9995e-10
RPL22L1	21.4803	47.5368	1.14603	5.05364e-15	2.9061e-14
AC022137.3	0.464254	1.1819	1.34812	0.00646324	0.00911556
AP003119.1	0.168296	1.78482	3.4067	0.000110056	0.000196465
AC017074.1	1.75462	3.86144	1.13798	5.09585e-08	1.32688e-07
MYH10	109.094	39.5435	-1.46406	1.59023e-21	1.9573e-20
VIPR1-AS1	1.34231	0.614037	-1.12831	4.18585e-09	1.22831e-08
JUN	414.859	200.111	-1.05182	2.00274e-13	9.56212e-13
RN7SL221P	0.434915	1.70705	1.9727	8.28285e-12	3.33076e-11
LILRB3	22.626	8.87278	-1.35053	1.55218e-24	2.92065e-23
RPP40	3.04959	9.27348	1.6045	9.79477e-26	2.27401e-24
TMPRSS11D	0.0410796	0.961483	4.54877	1.14293e-05	2.2953e-05
AC091812.2	0.372941	0.899551	1.27026	0.0100392	0.0137938
RNU5E-8P	2.04963	0.169055	-3.5998	2.93499e-31	4.27922e-29
SLC25A5P5	0.103237	1.85201	4.16506	3.49017e-12	1.45891e-11
IGDCC3	0.0857278	0.477169	2.47667	0.000507435	0.000833368
ABHD6	17.8512	7.25841	-1.29829	1.86508e-27	6.3962e-26
SMOX	6.18714	16.7178	1.43405	6.49683e-13	2.93704e-12
ATP1B1P1	0.150517	0.477182	1.66462	3.82081e-06	8.10105e-06
RPL35AP2	0.169224	3.26045	4.26807	0.0342976	0.0434553
HECW2	8.61862	3.54415	-1.28202	1.14283e-15	7.02801e-15
AC023283.1	0.077937	0.1982	1.34658	1.56251e-05	3.08357e-05
AC020612.3	0.264441	0.801628	1.59999	2.50694e-05	4.8235e-05
IGFL1	0.151024	2.43604	4.01168	4.35488e-07	1.02193e-06
TSLP	1.73778	0.490156	-1.82593	1.28429e-24	2.46196e-23
AC134775.1	0.313765	0.760824	1.27788	0.00272888	0.00406179
SLC4A3	1.59614	5.6775	1.83067	2.72934e-10	9.16907e-10
PRSS46P	0.136569	0.892602	2.70839	3.51339e-11	1.3125e-10
AF015262.1	0.00807963	0.213368	4.72291	4.7175e-10	1.54099e-09
AC079336.2	0.274867	0.658136	1.25965	9.11929e-06	1.85092e-05
FBXO2	9.31491	21.6529	1.21695	0.00705434	0.00990379
C2orf16	0.35938	0.879359	1.29094	4.50329e-17	3.24397e-16
C13orf46	12.5225	1.8254	-2.77824	6.95001e-29	3.52544e-27
CA5A	0.0495204	0.327353	2.72475	1.02021e-06	2.29465e-06
CLIC6	51.7825	126.489	1.28848	0.00107069	0.00168385
AC068025.2	0.11977	0.810581	2.75869	0.00483403	0.0069468
IRAIN	0.346165	0.884119	1.35278	5.38394e-06	1.12204e-05
SLC6A8	6.90488	25.5969	1.89028	3.14877e-13	1.47118e-12
LEFTY2	4.58679	1.16962	-1.97145	1.67577e-22	2.34159e-21
TLR8	19.82	6.26389	-1.66183	1.88335e-24	3.50756e-23
MYADM	279.149	71.7402	-1.96018	6.3964e-26	1.55433e-24
LRP2BP	6.75536	2.34069	-1.5291	8.35016e-24	1.40816e-22
RTBDN	0.0168315	0.723123	5.42501	7.95474e-17	5.56985e-16
LINC02864	0.0293537	3.26907	6.79919	1.30042e-13	6.33936e-13
EGR4	0.181791	0.761919	2.06736	0.00735207	0.0102969
SULF1	11.7033	67.9063	2.53663	1.00955e-20	1.12287e-19
AC104561.2	0.176163	0.411319	1.22335	7.61157e-06	1.55954e-05
TRDJ1	4.65043	1.59314	-1.54549	3.32632e-12	1.39545e-11
AC144450.1	0.172487	1.09285	2.66354	3.3217e-08	8.82478e-08
SYN3-AS1	2.20114	0.197834	-3.47589	6.19501e-30	4.5291e-28
CCT6P2	0.0588019	0.140866	1.26039	0.0134501	0.0181317
GAPDHP2	0.268574	0.599937	1.15949	9.00238e-08	2.28122e-07
OR2I1P	5.67753	14.6774	1.37026	0.000862253	0.00137194
DCDC2	9.55335	4.02597	-1.24667	2.87756e-19	2.68745e-18
C9orf50	0.101598	0.41578	2.03295	1.84055e-14	9.90335e-14
IPO4	0.0687241	0.153792	1.1621	3.16743e-11	1.19006e-10
AC132219.1	0.110761	0.286336	1.37026	0.035897	0.0453265
AC126615.1	0.446294	0.898617	1.00971	0.00523716	0.00748315
GJB6	0.122917	4.83791	5.29863	8.30879e-16	5.19096e-15
RAB26	0.4286	5.03166	3.55333	3.12077e-29	1.75003e-27
SCN1A	2.06628	0.585414	-1.8195	7.58199e-23	1.11245e-21
LINC02029	0.0209	0.26523	3.66567	1.49914e-11	5.84515e-11
AL139300.2	0.830419	0.326749	-1.34566	3.40166e-17	2.48478e-16
AL355075.5	0.139956	0.342017	1.2891	0.0154306	0.0206095
AC069499.2	0.0295019	0.356889	3.5966	6.4774e-11	2.34161e-10
MIR3662	0.387611	1.10879	1.51631	0.000443036	0.000732128
HMGN1P30	0.0995907	0.232019	1.22016	0.00103379	0.00162982
CST1	1.1346	82.1154	6.1774	6.18782e-25	1.24121e-23
AC104248.1	0.0744926	0.500803	2.74907	7.60876e-14	3.8141e-13
MYRIP	3.47836	1.58632	-1.13272	1.42514e-09	4.40492e-09
ERFL	0.767244	1.9191	1.32267	2.27284e-07	5.50938e-07
DYNLRB2	12.2358	2.7098	-2.17485	6.18793e-14	3.12829e-13
ANKRD40CL	0.00683704	0.133438	4.28666	2.39055e-07	5.77876e-07
AC106795.1	2.75838	6.07339	1.13868	6.68559e-15	3.78736e-14
AC007279.1	0.0460593	0.115526	1.32665	2.07034e-05	4.02046e-05
RPL35AP16	0.126722	0.551595	2.12194	0.00437651	0.00632744
LINC01106	0.943043	2.38127	1.33634	7.67714e-11	2.75154e-10
AL596442.2	2.87105	1.25258	-1.19668	1.79297e-16	1.20073e-15
C1QA	1554.6	537.317	-1.5327	1.17838e-26	3.40503e-25
AL138720.1	0.0360778	0.168777	2.22593	2.44802e-09	7.37093e-09
AC011498.3	0.0396259	0.166888	2.07436	2.24423e-06	4.87705e-06
TGM1	11.6044	2.0654	-2.49018	3.16628e-30	2.66626e-28
CCDC114	7.84731	3.52805	-1.15333	0.000380135	0.000634387
AL353807.1	0.136113	0.337506	1.31011	9.12918e-05	0.000164592
TMEM88	35.0346	7.74602	-2.17725	8.0434e-30	5.59202e-28
AL117344.1	0.340398	0.691417	1.02233	0.00121535	0.00189638
ACOXL-AS1	2.2912	0.969063	-1.24144	1.93309e-16	1.28948e-15
MIR4263	5.19752	10.9114	1.06995	6.3059e-10	2.03172e-09
FOXL2NB	0.0028	0.119254	5.41247	1.44305e-08	3.9891e-08
AC109322.1	1.0167	2.58426	1.34586	6.70613e-17	4.73981e-16
AC019226.2	0.170135	0.784574	2.20523	2.88827e-05	5.51397e-05
PAQR6	1.52617	4.76374	1.64218	1.25073e-08	3.47516e-08
PTGIS	43.5351	17.7438	-1.29486	7.04704e-20	7.04842e-19
AP003031.1	0.0263778	0.232197	3.13795	2.10551e-10	7.16008e-10
[truncated: 7,041 more rows]
