# Supplementary material for: Cuproptosis-Related lncRNA Prognostic Profile, Immune microenvironment, Response and Immune-related gene prognostic index in LUAD
Source: Research Square preprint supplement (doi:10.21203/rs.3.rs-3313594/v1), 2023-09-12
Supplement: Supplementary file 2 [file 163f8aeaf4ba426aa6657e59.xlsx]

## Sheet: Sheet1
gene	conMean	treatMean	logFC	pValue	fdr
CD1A	5.55446	19.4635	1.80905	0.00933348	0.0128859
FCER1G	424.613	185.555	-1.1943	5.66379e-23	8.47079e-22
HLA-DRB5	1965.58	889.459	-1.14396	8.52821e-15	4.76978e-14
HLA-E	2592.89	1008.02	-1.36305	9.77358e-29	4.68746e-27
HSPA6	9.42426	24.1181	1.35567	0.000577735	0.00094137
IFNG	1.16702	2.7918	1.25837	0.0109505	0.0149565
KIR2DL3	0.705887	0.276355	-1.35291	3.05016e-16	1.99551e-15
KIR2DS4	1.06823	0.450729	-1.24489	1.40687e-11	5.50558e-11
KIR3DL1	1.13201	0.315845	-1.84159	4.22261e-21	4.9422e-20
KLRD1	2.14879	1.0678	-1.00888	2.71666e-15	1.59862e-14
CLEC4M	2.13688	0.0944178	-4.50031	1.51497e-25	3.3848e-24
RAET1L	0.0329574	0.644081	4.28857	2.85646e-07	6.84858e-07
PDIA2	0.298187	7.73724	4.69753	4.21528e-12	1.74457e-11
HAMP	0.897248	2.01355	1.16616	1.44466e-07	3.58156e-07
CAMP	14.2137	2.37214	-2.58302	1.30835e-27	4.69155e-26
PPBP	17.4764	4.64641	-1.91122	1.83182e-21	2.23952e-20
CXCL14	14.5105	279.798	4.26921	4.15159e-10	1.36663e-09
CXCL16	334.136	161.399	-1.04981	5.54692e-24	9.66073e-23
SLPI	4740.04	2122.15	-1.15937	1.46181e-22	2.06409e-21
CXCL9	51.3168	130.38	1.34522	0.00139666	0.00216302
CXCL12	51.3691	21.0085	-1.28993	7.37204e-22	9.45215e-21
CXCL13	28.9436	77.0382	1.41233	1.15807e-16	7.9602e-16
CXCL2	443.997	88.2868	-2.33028	3.07484e-14	1.61164e-13
PF4	6.23793	1.3497	-2.20843	5.53316e-21	6.35939e-20
CXCL3	32.2799	9.74432	-1.728	9.51861e-12	3.80074e-11
CCL1	0.1766	0.65799	1.89758	0.000662385	0.00106926
DEFA3	2.66404	0.257908	-3.36869	8.37045e-21	9.40432e-20
DEFA4	0.844489	0.143354	-2.55849	1.57199e-10	5.42531e-10
LCN2	61.24	366.616	2.58172	9.19955e-11	3.27099e-10
COLEC10	3.95668	0.909811	-2.12065	1.52751e-26	4.29233e-25
S100A12	20.5531	4.94442	-2.05548	8.10409e-20	8.04575e-19
MMP12	4.35525	70.0721	4.00801	1.25665e-20	1.38086e-19
SFTPD	661.367	140.687	-2.23296	1.74168e-27	6.03789e-26
BPIFB2	1.71852	41.2451	4.58499	1.88077e-05	3.67048e-05
PTGDS	7.01864	2.35155	-1.57758	1.92119e-21	2.34206e-20
PGLYRP1	1.79136	0.420922	-2.08943	3.87679e-13	1.79293e-12
TMSB15A	14.6122	4.94636	-1.56273	1.72344e-19	1.66001e-18
S100B	7.66953	19.9796	1.38132	0.00282341	0.00419272
S100P	52.2904	1626.47	4.95906	3.17061e-10	1.05694e-09
S100A7	0.411744	24.6199	5.90193	0.000482971	0.000794879
PGLYRP3	0.033413	2.28501	6.09565	4.50951e-18	3.65503e-17
S100A2	10.566	107.857	3.35162	2.41417e-14	1.28195e-13
LCN12	0.517533	2.65946	2.36141	4.82282e-14	2.46849e-13
PGLYRP4	0.16878	3.62121	4.42326	4.06668e-17	2.94692e-16
S100A5	1.10585	4.2733	1.95019	0.0297054	0.0380111
S100A3	35.1806	6.76903	-2.37776	1.58106e-24	2.97279e-23
COLEC12	62.3771	19.8743	-1.65011	1.30995e-26	3.7303e-25
S100A16	179.213	417.673	1.22069	1.6098e-09	4.95166e-09
ZC3HAV1L	3.57884	11.1901	1.64466	3.74419e-21	4.41057e-20
BPIFB4	0.0187407	2.30577	6.94293	4.18648e-11	1.55078e-10
DEFB131B	0.777948	1.6245	1.06225	0.000639619	0.00103533
WFDC2	265.611	920.019	1.79235	1.2046e-11	4.75852e-11
IL6	77.26	10.65	-2.85886	5.90019e-14	2.99112e-13
UMODL1	0.166324	3.29689	4.30904	2.49022e-12	1.05758e-11
MMP9	22.3089	87.6122	1.97351	1.32152e-13	6.43609e-13
ANOS1	112.896	16.4835	-2.7759	1.65444e-31	2.91124e-29
TLR4	17.4583	6.02846	-1.53405	2.1372e-26	5.8197e-25
A2M	1932.2	522.635	-1.88637	5.24895e-28	2.09589e-26
SFTPA1	23741.2	3436.81	-2.78825	5.51011e-30	4.17182e-28
PLAU	26.5889	173.837	2.70884	1.23157e-17	9.43931e-17
PAEP	1.07847	195.753	7.5039	3.32721e-12	1.39559e-11
HJV	0.0415722	0.134852	1.69769	0.0205852	0.0269764
MUC5AC	5.5116	43.8364	2.99159	0.00490688	0.00704367
OBP2A	0.195863	2.87931	3.87781	0.0214249	0.028002
IFNL1	0.0943407	0.32548	1.78662	0.000198178	0.000342675
SFTPA2	25922.8	4177.55	-2.6335	1.44341e-28	6.68398e-27
LBP	0.563994	14.5806	4.69222	0.00403205	0.00586176
RBP4	63.4068	15.9959	-1.98693	1.30011e-25	2.93043e-24
NOX4	1.22087	3.03478	1.31368	6.9624e-10	2.23033e-09
FABP7	0.0934611	7.62765	6.35073	0.000522113	0.000855876
FABP5	50.9677	14.9628	-1.7682	2.28536e-26	6.18356e-25
FABP4	374.523	12.8759	-4.86231	6.97769e-33	6.25834e-30
OASL	28.197	13.5517	-1.05707	5.08561e-17	3.64902e-16
CRABP2	11.8388	600.757	5.66519	3.41395e-26	8.88845e-25
CRABP1	0.126541	9.4625	6.22455	1.35536e-10	4.71593e-10
DUOX1	95.4038	15.726	-2.6009	6.69235e-30	4.75642e-28
RBP2	14.0357	1.98964	-2.81853	6.83214e-29	3.47948e-27
CETP	4.25215	1.85064	-1.20017	6.10071e-17	4.33233e-16
FABP12	0.3968	0.113008	-1.81199	1.7934e-17	1.34822e-16
BPIFA1	36.0578	1441.47	5.32108	9.13208e-05	0.000164624
C8G	1.06557	3.03812	1.51156	0.000642921	0.00104001
PI15	0.9776	5.50298	2.4929	7.53452e-10	2.40154e-09
NOX1	1.02165	2.82717	1.46846	1.26069e-13	6.15509e-13
CTSG	13.0493	3.20311	-2.02642	1.3016e-15	7.97176e-15
CYBB	218.661	94.1919	-1.21502	6.66642e-18	5.29557e-17
BPIFA2	0.364983	15.0786	5.36853	1.60447e-10	5.53067e-10
NOX5	0.0595889	0.554939	3.21921	4.14454e-11	1.53704e-10
GDF15	51.3918	150.64	1.5515	0.00022808	0.000391434
SOCS3	542.027	192.181	-1.4959	4.41813e-09	1.29365e-08
CCL20	32.2501	76.4106	1.24447	0.000221764	0.000381236
IKBKE	7.22715	16.4776	1.18901	5.25324e-22	6.91267e-21
ISG15	128.133	370.576	1.53212	9.53382e-08	2.40966e-07
TNFAIP3	89.1205	42.805	-1.05798	5.68989e-08	1.47418e-07
TFR2	0.29445	2.58542	3.1343	6.55684e-30	4.68621e-28
MUC4	4.14575	22.2961	2.42709	4.84615e-08	1.26522e-07
IL27	1.33703	0.640197	-1.06244	1.11455e-12	4.89969e-12
LYZ	1566.23	730.887	-1.09957	5.10567e-20	5.2046e-19
CST4	0.0352074	4.51168	7.00164	5.10929e-19	4.60716e-18
CSRP1	158.312	78.9749	-1.00331	7.16726e-26	1.72684e-24
JUN	414.859	200.111	-1.05182	2.00274e-13	9.56212e-13
ITGAV	43.4244	87.4322	1.00966	1.77648e-10	6.08988e-10
IL12B	0.481061	0.987482	1.03753	0.00950484	0.0131055
TLR8	19.82	6.26389	-1.66183	1.88335e-24	3.50756e-23
BPHL	3.37625	8.52239	1.33584	1.49599e-24	2.82115e-23
AHNAK	437.037	116.217	-1.91093	1.62985e-25	3.62245e-24
MX2	5.87602	16.7317	1.50968	2.7723e-16	1.81932e-15
FGF2	7.73244	1.90234	-2.02315	2.24552e-27	7.56861e-26
F2RL1	14.4362	36.457	1.33651	3.94079e-08	1.03841e-07
MSR1	128.729	27.2961	-2.23757	1.87174e-29	1.12902e-27
EPPIN	0.344741	0.119929	-1.52333	2.31903e-09	7.0007e-09
SLC11A1	44.7654	12.6062	-1.82826	1.58449e-25	3.53084e-24
DES	100.329	11.6079	-3.11156	9.96157e-31	1.06794e-28
MARCO	734.376	92.1058	-2.99515	5.56669e-31	6.96246e-29
TNFSF11	0.18585	3.16858	4.09162	4.31482e-23	6.54145e-22
JUND	619.77	224.005	-1.4682	6.81827e-22	8.77706e-21
CLDN4	141.659	330.035	1.22019	1.80312e-15	1.0848e-14
CCL28	5.26443	10.8094	1.03794	0.0323506	0.0411519
RN7SL1	596.572	8720.75	3.86968	0.0169858	0.0225303
IRF7	28.8761	68.5957	1.24824	1.07693e-18	9.36215e-18
IL17A	0.0252667	0.125769	2.31547	0.000252157	0.000430441
APOBEC3A	6.32815	2.61077	-1.27731	5.88909e-13	2.67224e-12
IL7R	134.828	33.0489	-2.02845	1.48226e-24	2.80354e-23
PTX3	18.8343	4.65258	-2.01726	2.02989e-14	1.08489e-13
MASP1	4.41731	0.678493	-2.70276	3.84874e-30	3.12741e-28
PROC	0.400617	5.99616	3.90374	4.00829e-21	4.70865e-20
HRG	0.00635926	0.218324	5.10147	4.90177e-09	1.42789e-08
HMOX1	278.217	93.2936	-1.57636	6.4288e-09	1.84574e-08
ARRB1	53.5638	21.3317	-1.32826	4.17042e-26	1.06196e-24
STAB2	1.08443	0.451447	-1.26431	4.44611e-10	1.45702e-09
PCSK1	0.359626	31.6063	6.45757	8.65985e-08	2.19813e-07
ARG2	3.47471	7.50729	1.1114	4.42793e-07	1.03802e-06
AQP9	37.5799	13.2914	-1.49946	1.02899e-19	1.01174e-18
BIRC5	2.79523	37.9427	3.76278	1.05931e-29	6.93031e-28
VIM	572.28	265.125	-1.11005	3.51305e-26	9.07284e-25
GFAP	0.0411889	0.313376	2.92757	5.39859e-14	2.74798e-13
OAS1	23.8298	55.5969	1.22223	3.18414e-08	8.47786e-08
AGER	3904.45	114.342	-5.09369	2.61676e-33	3.51404e-30
TNFSF4	1.8189	4.42425	1.28237	1.49957e-10	5.19014e-10
NOS1	3.24684	0.80819	-2.00627	1.4967e-25	3.34985e-24
CXCR1	9.36512	1.22019	-2.9402	7.41842e-24	1.26356e-22
CCL14	1.24385	0.283173	-2.13506	4.8038e-19	4.35104e-18
CCL16	0.479144	0.173577	-1.46489	9.72275e-10	3.05851e-09
CCL18	556.49	261.596	-1.08902	6.50989e-07	1.49761e-06
CCL26	1.18534	2.76543	1.2222	0.00133907	0.00207862
CCR3	0.36365	0.982898	1.43449	6.69237e-07	1.53697e-06
CCR8	0.711506	2.24938	1.66058	1.1016e-13	5.4169e-13
ACKR4	8.52607	1.57723	-2.43449	1.90826e-28	8.57205e-27
CCL2	219.982	77.1408	-1.51182	8.89822e-08	2.25572e-07
CCL7	1.14973	4.50164	1.96915	9.20501e-09	2.59721e-08
CCL23	27.9847	4.99241	-2.48683	3.9165e-29	2.13525e-27
CCL25	0.119093	0.933735	2.97093	1.39402e-12	6.07487e-12
CCL24	30.118	5.49507	-2.45442	5.72156e-15	3.2637e-14
TAFA3	0.0954556	0.42145	2.14246	8.69989e-05	0.000157186
CDH1	113.011	240.082	1.08707	2.69727e-15	1.58866e-14
IL13	0.313209	0.0872082	-1.84459	2.9095e-07	6.96592e-07
PPARG	38.4186	13.269	-1.53375	8.0886e-25	1.59367e-23
FGR	91.069	21.1508	-2.10625	7.68485e-31	8.83239e-29
HCK	93.6188	39.4752	-1.24585	1.30118e-23	2.1241e-22
OLR1	213.462	39.2622	-2.44277	1.94923e-29	1.16474e-27
CD79A	29.2475	72.0661	1.30101	1.00033e-11	3.98307e-11
BTK	26.2097	10.1444	-1.36941	7.34524e-27	2.21791e-25
RAC3	6.65965	35.1201	2.39878	2.4997e-22	3.41434e-21
NFATC1	12.95	5.79882	-1.15912	9.62983e-19	8.40306e-18
NFATC4	6.87631	15.7675	1.19725	1.24382e-13	6.07973e-13
FOS	1047.78	335.218	-1.64417	1.60579e-13	7.73782e-13
CARD11	6.46396	22.7343	1.81438	1.26069e-13	6.15509e-13
CD19	2.43614	5.11918	1.07132	9.60599e-13	4.25811e-12
PIK3R5	15.3098	6.65378	-1.20221	5.92592e-21	6.78026e-20
PIK3R1	32.6308	16.2882	-1.0024	4.00831e-21	4.70865e-20
LILRB3	22.626	8.87278	-1.35053	1.55218e-24	2.92065e-23
IFITM1	115.9	245.603	1.08345	4.98368e-06	1.04331e-05
IGHA1	2224.27	7341.01	1.72265	4.14517e-08	1.09046e-07
IGHA2	180.08	711.336	1.9819	4.94629e-09	1.4402e-08
IGHD	68.6964	187.269	1.44681	0.00392017	0.00571072
IGHD2-2	0.970537	4.38674	2.17629	9.08116e-06	1.84376e-05
IGHD3-3	2.09938	10.4314	2.3129	7.95335e-08	2.02991e-07
IGHD3-9	1.58829	6.58786	2.05234	1.94265e-07	4.74596e-07
IGHD6-25	2.05331	5.70744	1.47489	7.17279e-05	0.000131024
IGHG1	860.058	6844.84	2.99251	2.84936e-17	2.09756e-16
IGHG2	165.71	952.033	2.52235	1.58622e-16	1.06844e-15
IGHG3	150.018	977.934	2.7046	5.07868e-16	3.24118e-15
IGHG4	40.983	490.525	3.58123	1.5118e-20	1.63794e-19
IGHJ1	3.2351	26.3589	3.02641	9.06875e-13	4.02976e-12
IGHJ2	12.4811	69.8291	2.48408	1.31903e-11	5.17931e-11
IGHJ3	36.6467	135.53	1.88686	4.16301e-12	1.72378e-11
IGHJ4	22.3822	113.31	2.33986	5.1058e-13	2.33342e-12
IGHJ5	6.22196	41.1159	2.72425	3.45187e-15	2.01405e-14
IGHJ6	23.6653	123.393	2.38242	2.77851e-07	6.67046e-07
IGHM	769.189	1816.81	1.23999	5.07035e-08	1.32077e-07
IGHV1-18	135.628	725.507	2.41933	5.06257e-12	2.07571e-11
IGHV1-2	78.5611	474.242	2.59374	1.54156e-11	5.99406e-11
IGHV1-24	36.3191	358.312	3.30242	1.49152e-13	7.21578e-13
IGHV1-3	56.7542	387.504	2.77141	3.88343e-07	9.17037e-07
IGHV1-45	5.72084	23.2249	2.02137	5.13764e-05	9.54123e-05
IGHV1-46	33.6544	228.423	2.76284	5.11168e-14	2.60745e-13
IGHV1-58	6.56606	52.2044	2.99107	4.05769e-10	1.33745e-09
IGHV1-69	22.5861	121.044	2.42202	2.65393e-09	7.95817e-09
IGHV2-26	18.1811	116.507	2.6799	2.06679e-10	7.03313e-10
IGHV2-5	79.1383	452.199	2.51451	1.33367e-10	4.64238e-10
IGHV2-70	17.583	111.704	2.66743	3.74498e-10	1.23858e-09
IGHV3-11	62.6735	343.387	2.45391	3.73974e-12	1.55711e-11
IGHV3-13	20.3603	71.7352	1.81692	8.22756e-07	1.86917e-06
IGHV3-15	82.3747	477.598	2.53552	3.60035e-12	1.50103e-11
IGHV3-16	0.119428	0.832004	2.80045	2.07442e-05	4.02808e-05
IGHV3-20	13.2256	70.5381	2.41507	6.09461e-09	1.75473e-08
IGHV3-21	157.524	699.831	2.15143	4.81397e-12	1.98015e-11
IGHV3-23	164.589	932.185	2.50175	3.91255e-14	2.02574e-13
IGHV3-30	82.5057	377.757	2.19489	1.7592e-11	6.79986e-11
IGHV3-33	35.5442	257.083	2.85455	1.27778e-13	6.23378e-13
IGHV3-35	1.44919	7.23445	2.31963	1.28024e-10	4.4686e-10
IGHV3-38	1.80234	4.33805	1.26717	2.111e-08	5.72697e-08
IGHV3-43	8.96051	65.6236	2.87256	3.98388e-12	1.65202e-11
IGHV3-48	68.4003	336.434	2.29825	1.62754e-10	5.60339e-10
IGHV3-49	49.8678	241.006	2.27289	1.48977e-09	4.59409e-09
IGHV3-53	13.8621	80.2964	2.53419	7.166e-13	3.223e-12
IGHV3-64	5.28926	38.1029	2.84876	2.62226e-07	6.31318e-07
IGHV3-66	9.91776	48.4245	2.28765	5.06983e-11	1.86019e-10
IGHV3-7	128.13	473.886	1.88693	8.07473e-11	2.88917e-10
IGHV3-72	21.2351	74.5801	1.81234	9.69474e-07	2.18672e-06
IGHV3-73	34.4288	231.49	2.74926	4.40625e-09	1.29047e-08
IGHV3-74	70.4501	219.224	1.63773	5.77638e-10	1.86562e-09
IGHV3-69-1	5.2234	21.6586	2.05188	7.65359e-12	3.0855e-11
IGHV4-28	11.9934	54.5421	2.18513	1.52271e-11	5.92888e-11
IGHV4-31	40.1611	176.276	2.13397	1.22482e-08	3.40798e-08
IGHV4-34	60.8715	387.428	2.67009	8.12383e-14	4.05953e-13
IGHV4-39	126.389	675.251	2.41755	1.66363e-12	7.20303e-12
IGHV4-4	37.3368	245.397	2.71644	3.62782e-09	1.07333e-08
IGHV4-59	107.376	415.713	1.95292	1.43093e-10	4.96264e-10
IGHV4-61	7.52297	44.4404	2.5625	2.47387e-10	8.34933e-10
IGHV5-51	145.422	883.48	2.60295	1.61099e-12	6.98106e-12
IGHV5-10-1	30.559	246.161	3.00993	5.49526e-06	1.14404e-05
IGHV6-1	42.404	159.642	1.91257	2.68246e-10	9.01751e-10
IGHV7-4-1	16.3471	118.68	2.85997	0.000244566	0.000418182
IGHV7-81	0.854824	5.43116	2.66756	5.21385e-17	3.73579e-16
IGKC	5821.65	33231	2.51303	8.54154e-16	5.32594e-15
IGKJ1	40.2071	197.26	2.29457	5.58662e-14	2.8378e-13
IGKJ3	3.70325	28.0441	2.92083	3.46425e-15	2.02081e-14
IGKJ4	6.55559	52.1148	2.99089	4.52469e-18	3.6661e-17
IGKJ5	7.59991	51.6087	2.76356	7.71429e-16	4.83256e-15
IGKV1-12	41.3758	172.393	2.05884	1.99681e-08	5.43163e-08
IGKV1-13	0.572622	5.42789	3.24473	3.73442e-09	1.10218e-08
IGKV1-16	56.2976	340.224	2.59534	1.23344e-09	3.83887e-09
IGKV1-17	47.2128	239.861	2.34495	5.95935e-11	2.16476e-10
IGKV1-27	46.5443	215.132	2.20854	6.88967e-09	1.97317e-08
IGKV1-33	1.53889	16.8977	3.45687	5.91931e-15	3.37199e-14
IGKV1-37	0.115167	0.861051	2.90238	1.16457e-09	3.6374e-09
IGKV1-39	8.10766	42.7748	2.3994	2.87486e-11	1.08429e-10
IGKV1-5	203.373	1220.47	2.58523	3.14877e-13	1.47118e-12
IGKV1-6	45.0706	182.062	2.01417	1.55317e-10	5.36325e-10
IGKV1-9	64.1639	339.877	2.40518	5.12666e-12	2.10131e-11
IGKV1D-12	2.82881	14.6897	2.37654	8.62495e-09	2.44327e-08
IGKV1D-13	7.47791	28.0382	1.90669	1.31042e-05	2.61254e-05
IGKV1D-16	6.65749	50.9574	2.93624	8.05782e-09	2.28795e-08
IGKV1D-17	2.49868	12.7244	2.34836	6.95488e-06	1.42958e-05
IGKV1D-33	2.3361	18.2133	2.96282	3.69561e-11	1.37796e-10
IGKV1D-37	0.141707	0.964073	2.76623	3.59178e-10	1.19049e-09
IGKV1D-39	9.50787	45.172	2.24824	4.56415e-11	1.68189e-10
IGKV1D-42	2.76587	7.78471	1.49291	5.87261e-07	1.35835e-06
IGKV1D-43	1.48741	6.11647	2.03989	1.58201e-06	3.49661e-06
IGKV1D-8	5.74555	23.0818	2.00624	6.45093e-10	2.07639e-09
IGKV2-24	43.1991	164.705	1.93081	3.43611e-07	8.15859e-07
IGKV2-28	2.41324	17.1568	2.82974	1.46539e-11	5.72141e-11
IGKV2-30	36.6585	140.363	1.93695	2.66045e-07	6.39906e-07
IGKV2-40	0.109611	1.34698	3.61926	7.07678e-09	2.02449e-08
IGKV2D-24	3.26392	11.1478	1.77209	1.54481e-06	3.41766e-06
IGKV2D-28	2.08039	16.1821	2.95947	5.78747e-10	1.86897e-09
IGKV2D-29	17.2183	92.913	2.43194	1.63591e-08	4.49786e-08
IGKV2D-30	2.10851	8.8708	2.07284	9.51541e-06	1.92672e-05
IGKV2D-40	6.66408	42.0251	2.65677	1.28184e-09	3.98225e-09
IGKV3-11	180.966	924.725	2.35331	1.35757e-13	6.59027e-13
IGKV3-15	95.4172	634.33	2.73291	8.11619e-16	5.07809e-15
IGKV3-20	455.342	1936.36	2.08833	1.39817e-12	6.09088e-12
IGKV3-7	5.30918	26.2656	2.30662	1.3981e-12	6.09088e-12
IGKV3D-11	5.73539	32.0952	2.48439	5.37244e-13	2.44913e-12
IGKV3D-15	6.8946	48.3692	2.81055	1.75197e-13	8.41518e-13
IGKV3D-20	20.4867	90.4569	2.14255	5.57991e-11	2.03533e-10
IGKV3D-7	0.302281	3.10485	3.36056	1.31273e-09	4.07274e-09
IGKV4-1	234.265	1614.08	2.7845	1.0457e-14	5.7977e-14
IGKV5-2	5.72776	35.6122	2.63633	1.12373e-07	2.82038e-07
IGKV6-21	9.43147	59.4969	2.65726	1.04335e-09	3.27604e-09
IGKV6D-21	4.75221	20.2078	2.08824	5.32542e-06	1.11066e-05
IGKV6D-41	0.143176	1.79676	3.64954	7.77287e-05	0.000141378
IGLC2	678.437	2640.34	1.96044	7.59951e-13	3.40477e-12
IGLC3	379.48	1683.48	2.14935	7.14693e-12	2.88809e-11
IGLC6	2.95472	9.0885	1.62102	1.04117e-11	4.13923e-11
IGLC7	24.2367	86.6773	1.83846	1.85856e-06	4.07293e-06
IGLJ2	2.29887	6.26093	1.44545	2.58396e-11	9.80513e-11
IGLJ3	0.357454	1.46897	2.03898	1.61846e-07	3.9883e-07
IGLV1-36	15.7716	78.2415	2.31061	7.32032e-07	1.67289e-06
IGLV1-40	185.933	997.531	2.42358	6.98122e-13	3.14321e-12
IGLV1-44	213.617	617.864	1.53226	1.1929e-09	3.71998e-09
IGLV1-47	105.756	495.796	2.229	1.22714e-11	4.83933e-11
IGLV1-50	1.46829	7.47117	2.3472	3.77529e-10	1.24807e-09
IGLV1-51	3.91882	14.8726	1.92417	2.54252e-08	6.83444e-08
IGLV10-54	12.5711	49.8226	1.98668	0.000342607	0.000575145
IGLV11-55	0.130096	0.439046	1.75479	2.33948e-05	4.51492e-05
IGLV2-11	145.211	543.295	1.90359	5.02659e-09	1.46275e-08
IGLV2-14	216.161	1154.59	2.41721	4.35215e-12	1.7983e-11
IGLV2-18	17.25	81.3282	2.23716	3.98501e-07	9.39893e-07
IGLV2-23	180.288	883.56	2.29302	5.35088e-11	1.95626e-10
IGLV2-33	0.424467	2.66982	2.65302	9.38694e-10	2.95798e-09
IGLV2-8	45.4964	224.85	2.30514	1.96141e-10	6.68878e-10
IGLV3-1	247.621	1250.73	2.33656	5.77656e-12	2.3537e-11
IGLV3-10	70.146	371.888	2.40644	5.50612e-09	1.59574e-08
IGLV3-12	1.14767	8.5968	2.90509	1.01946e-10	3.60569e-10
IGLV3-19	187.276	1028.5	2.4573	2.26073e-11	8.64028e-11
IGLV3-21	125.719	859.77	2.77375	3.38632e-14	1.76836e-13
IGLV3-25	323.009	764.158	1.2423	7.20223e-10	2.30051e-09
IGLV3-27	24.1556	128.243	2.40845	1.00306e-06	2.25768e-06
IGLV3-32	0.0919259	0.631764	2.78084	1.06141e-08	2.97604e-08
IGLV3-9	22.985	128.561	2.48369	1.17853e-13	5.77163e-13
IGLV4-3	1.70317	6.20857	1.86604	2.25119e-05	4.3521e-05
IGLV4-60	10.5503	57.7253	2.45192	3.29906e-06	7.04338e-06
IGLV4-69	48.1671	296.903	2.62387	1.34152e-10	4.66908e-10
IGLV5-37	2.82995	18.5993	2.7164	1.39892e-05	2.77662e-05
IGLV5-45	15.7284	74.97	2.25294	2.64152e-07	6.35654e-07
IGLV5-48	0.81595	4.50758	2.4658	2.06198e-07	5.02305e-07
IGLV6-57	92.6321	600.104	2.69563	1.0384e-12	4.58705e-12
IGLV7-43	22.9982	92.1624	2.00266	1.58414e-07	3.90864e-07
IGLV7-46	27.995	112.449	2.00602	2.05961e-08	5.5947e-08
IGLV8-61	58.5755	218.733	1.9008	1.39365e-05	2.76681e-05
IGLV9-49	16.2237	110.737	2.77096	1.19821e-05	2.39941e-05
CKLF	0.246094	0.830933	1.75552	5.77205e-05	0.000106527
CMA1	2.59398	0.680887	-1.92968	7.03079e-15	3.96794e-14
CX3CL1	120.611	56.7475	-1.08773	9.17025e-12	3.66911e-11
CCN1	516.322	170.454	-1.59889	1.85395e-17	1.38964e-16
EDN1	170.341	42.7411	-1.99473	6.30569e-22	8.16285e-21
EDN2	3.98878	14.9178	1.90302	3.50979e-07	8.32425e-07
EDN3	1.56275	0.22796	-2.77723	2.05502e-27	6.98187e-26
FGF10	3.44647	0.386205	-3.15768	3.78657e-30	3.09662e-28
PROK2	2.54347	0.601886	-2.07924	6.20685e-15	3.5279e-14
SAA1	17.6133	85.4982	2.27923	0.00103736	0.00163496
SAA2	1.27087	6.45172	2.34386	0.000132649	0.000234269
SEMA3A	2.72062	9.72534	1.83781	0.0024231	0.00363564
SEMA3B	67.369	21.4616	-1.65032	6.41517e-23	9.51646e-22
SEMA3D	3.84119	1.739	-1.1433	1.69028e-17	1.27521e-16
SEMA3G	55.2256	5.64329	-3.29073	2.91625e-30	2.48857e-28
SEMA4B	33.1682	102.341	1.62551	2.48631e-19	2.34263e-18
SEMA5A	35.1686	6.29276	-2.48252	2.17194e-28	9.57118e-27
SEMA6A	15.4594	2.63208	-2.55421	6.16093e-29	3.17568e-27
SEMA6D	9.88901	2.58401	-1.93622	1.49598e-24	2.82115e-23
SLIT2	41.7156	7.66449	-2.44432	1.38019e-29	8.73834e-28
TNC	37.5351	123.364	1.71661	2.84071e-05	5.4309e-05
C5AR1	111.606	29.641	-1.91274	1.74461e-28	7.90654e-27
CCRL2	25.4557	8.4631	-1.58873	4.26963e-27	1.36174e-25
CX3CR1	13.9126	4.71624	-1.56069	6.24093e-17	4.42572e-16
ACKR1	106.79	18.982	-2.49207	3.02752e-25	6.38406e-24
EDNRB	111.009	9.77732	-3.5051	1.80947e-32	9.61845e-30
FPR1	68.6134	18.4615	-1.89397	9.63785e-21	1.07431e-19
FPR2	22.8245	3.04514	-2.906	8.67849e-28	3.25636e-26
GPR17	3.37263	0.789267	-2.09529	4.29472e-23	6.51485e-22
PTGDR2	1.11936	0.545222	-1.03776	3.04646e-15	1.78526e-14
CXCR2	10.9072	1.77643	-2.61822	4.14698e-27	1.32761e-25
PLXNA3	10.2701	21.2054	1.04599	1.64939e-11	6.39676e-11
PLXNB3	1.01051	10.1993	3.33531	4.45416e-19	4.04585e-18
ROBO2	4.7716	1.50113	-1.66843	2.72874e-22	3.71327e-21
ADM2	1.23588	13.5475	3.45442	6.16665e-30	4.5291e-28
AGRP	24.0266	2.78518	-3.10879	1.94825e-29	1.16474e-27
AGT	5.67142	47.6802	3.07161	2.30728e-06	5.00471e-06
ANGPTL5	1.2993	0.222352	-2.54682	4.00863e-25	8.26172e-24
ANGPTL7	5.32744	0.521845	-3.35175	2.91728e-29	1.6541e-27
APLN	44.7392	14.0792	-1.66798	7.16814e-16	4.5037e-15
MANF	52.445	135.018	1.36427	2.8405e-28	1.21807e-26
ARTN	0.512611	3.32953	2.69938	1.28149e-16	8.78012e-16
BDNF	3.85301	0.81016	-2.24971	4.92594e-26	1.2298e-24
BMP2	80.337	24.308	-1.72464	1.59652e-22	2.23943e-21
BMP8A	1.03998	7.09184	2.7696	8.67095e-25	1.69792e-23
BMP8B	2.50266	6.0027	1.26215	9.30328e-14	4.61546e-13
CALCB	0.0462741	0.935283	4.33713	0.000537941	0.000880352
CAT	324.798	88.7472	-1.87177	9.32289e-33	7.20829e-30
CD70	1.16836	2.80451	1.26326	0.000328825	0.000553417
ADA2	71.6314	35.5998	-1.00872	6.26295e-18	4.98905e-17
CGA	0.0498722	17.7548	8.47576	6.47159e-06	1.33508e-05
CGB7	0.0625148	0.18612	1.57396	4.08883e-05	7.67501e-05
CHGB	0.505213	23.4262	5.53509	0.00420127	0.00609079
CMTM1	1.1297	2.55883	1.17955	6.36266e-15	3.61325e-14
CMTM2	4.80054	0.93245	-2.3641	3.00841e-27	9.79075e-26
CMTM5	0.622143	0.0761537	-3.03026	8.92399e-31	9.85695e-29
CORT	0.270439	0.585271	1.1138	1.17589e-07	2.94551e-07
CSF3	106.846	3.91428	-4.77064	2.19431e-17	1.6323e-16
CCN2	828.175	275.301	-1.58892	3.43912e-19	3.17932e-18
EGF	0.995287	5.02924	2.33716	1.85551e-12	7.98908e-12
EPGN	2.77987	1.26372	-1.13734	1.20222e-11	4.75059e-11
FAM3C	27.9435	67.9971	1.28296	5.88202e-16	3.72684e-15
FGF11	0.0220056	0.238177	3.4361	1.65843e-20	1.78846e-19
FGF14	1.44561	0.608769	-1.24771	3.01888e-16	1.97555e-15
FGF19	0.0050963	4.61624	9.82305	2.01901e-14	1.07953e-13
FGF20	0.0914056	0.588086	2.68567	7.90259e-06	1.61514e-05
FGF5	0.00724444	0.496138	6.09772	1.41592e-08	3.91707e-08
VEGFD	88.5525	7.29051	-3.60244	7.04594e-32	1.79777e-29
GAL	0.237041	8.70488	5.19862	1.78462e-15	1.07469e-14
GDF10	37.4152	4.01835	-3.21895	4.47241e-31	5.85202e-29
GDNF	0.0647722	0.560302	3.11276	1.705e-11	6.59837e-11
GMFG	146.464	51.403	-1.51062	3.79978e-29	2.07604e-27
GPI	42.8936	95.7766	1.15891	5.46559e-23	8.19839e-22
GREM1	0.471961	15.1165	5.00131	5.29008e-26	1.30918e-24
GUCA2A	3.78415	1.6965	-1.15741	2.03756e-21	2.47408e-20
HBEGF	175.394	29.713	-2.56143	2.47569e-27	8.2788e-26
HDGF	180.629	376.053	1.05791	4.79255e-21	5.56333e-20
IFNE	0.0803352	0.651686	3.02007	0.00546507	0.00778866
IL11	0.346409	2.34489	2.75897	2.45397e-17	1.81804e-16
IL17C	0.106778	1.98169	4.21405	1.93519e-14	1.03863e-13
IL17D	4.22939	1.36839	-1.62797	5.13386e-27	1.59942e-25
IL19	0.0330907	0.166672	2.33251	5.5706e-08	1.44474e-07
IL36RN	0.0464963	3.72545	6.32416	8.49348e-19	7.4548e-18
IL37	0.442943	42.3111	6.57777	3.81248e-12	1.5861e-11
IL36G	0.0747685	1.73339	4.53502	1.82341e-15	1.09624e-14
IL20	0.27358	0.115244	-1.24727	0.000326648	0.000549945
IL21	0.103602	0.359115	1.79339	4.15527e-11	1.54057e-10
IL23A	1.91691	8.79261	2.19751	1.33283e-20	1.45455e-19
IL33	123.313	25.4977	-2.27388	4.37581e-29	2.36044e-27
IL34	16.3421	6.54958	-1.31912	1.25814e-22	1.78639e-21
INHA	0.312517	24.2088	6.27546	6.6174e-13	2.9889e-12
INHBB	15.812	32.997	1.06132	0.00306316	0.00452635
INHBC	0.0925056	0.211839	1.19536	0.0051749	0.00740121
INHBE	0.0236167	0.694089	4.87724	7.79377e-12	3.14003e-11
INSL3	0.400567	1.58459	1.984	5.66054e-20	5.7404e-19
INSL4	0.0289611	7.42183	8.00151	1.34355e-05	2.67274e-05
KL	13.3851	2.48375	-2.43004	1.74341e-29	1.06674e-27
LEFTY2	4.58679	1.16962	-1.97145	1.67577e-22	2.34159e-21
LHB	0.293472	1.20591	2.03883	1.84031e-13	8.81627e-13
LTBP4	187.92	39.8343	-2.23804	3.79978e-29	2.07604e-27
MDK	59.3341	502.237	3.08143	4.54347e-26	1.14101e-24
NDP	0.208046	2.39122	3.52277	0.00173281	0.00265111
NRG1	2.323	0.745233	-1.64023	3.38695e-25	7.09526e-24
NRG3	1.34714	0.209358	-2.68586	6.14257e-28	2.41119e-26
OGN	26.8683	6.17016	-2.12252	7.09121e-24	1.21106e-22
OXT	0.287233	1.25287	2.12494	0.000388881	0.000648347
ENDOU	0.732069	0.244247	-1.58364	3.68061e-22	4.90652e-21
PDGFB	56.1663	19.8342	-1.50171	1.02671e-20	1.13997e-19
PDGFRL	8.353	23.3427	1.4826	2.55163e-14	1.34904e-13
PGF	2.97826	7.82573	1.39376	1.51337e-11	5.89433e-11
PNOC	0.630069	1.72575	1.45364	5.78374e-11	2.10551e-10
PRLH	0.984278	0.199045	-2.30597	5.89901e-09	1.70264e-08
PTHLH	0.742306	4.91328	2.7266	7.72327e-09	2.20006e-08
RETN	96.3306	12.163	-2.9855	2.5445e-28	1.10312e-26
RETNLB	0.0108815	0.523147	5.58727	4.45309e-09	1.30299e-08
RLN3	0.0966481	0.568401	2.5561	7.98663e-07	1.81751e-06
SPP1	28.13	821.283	4.8677	4.48105e-28	1.82351e-26
TGFA	10.6159	30.024	1.49988	1.96337e-09	5.9687e-09
THPO	0.419546	3.20522	2.93352	6.538e-05	0.000119909
TNFSF12	69.233	29.6851	-1.22172	2.32516e-30	2.11881e-28
TNFSF13	38.5858	18.2653	-1.07897	1.15007e-25	2.62235e-24
TRH	1.15424	0.460621	-1.3253	1.68733e-05	3.3135e-05
TSHB	0.263017	0.0832709	-1.65927	2.81055e-09	8.4089e-09
TSLP	1.73778	0.490156	-1.82593	1.28429e-24	2.46196e-23
UCN	1.7466	4.53316	1.37597	1.80062e-08	4.92581e-08
UCN2	0.0489019	0.886864	4.18075	3.80518e-16	2.46669e-15
VGF	0.114707	8.05291	6.13348	1.26068e-19	1.2296e-18
VIP	0.700498	0.21403	-1.71057	1.30689e-16	8.94215e-16
ACVRL1	131.823	21.6789	-2.60423	2.80077e-32	1.05091e-29
ADCYAP1R1	1.54924	0.348412	-2.15269	6.77568e-24	1.1634e-22
ADRB1	37.0904	4.10113	-3.17696	2.76989e-30	2.39584e-28
ADRB2	76.9364	9.12245	-3.07617	7.6037e-33	6.25834e-30
AGTR1	8.02862	2.17409	-1.88474	4.93862e-27	1.54802e-25
AGTR2	45.4458	8.56199	-2.40813	7.5101e-25	1.48774e-23
ANGPT1	26.3556	5.46816	-2.26898	4.55571e-29	2.44713e-27
ANGPT4	5.51425	0.302336	-4.18894	4.08556e-31	5.54485e-29
ANGPTL1	12.9991	2.86751	-2.18053	3.94001e-28	1.62933e-26
ANGPTL3	0.0272241	0.529705	4.28223	4.92993e-10	1.60648e-09
ANGPTL4	30.3391	79.0052	1.38077	4.8579e-06	1.01765e-05
APLNR	36.0002	12.6195	-1.51235	2.60874e-11	9.89621e-11
AVPR1B	0.0184574	0.249237	3.75525	3.38663e-10	1.12571e-09
AVPR2	4.24717	1.1231	-1.91901	3.28606e-26	8.57298e-25
BMPR2	73.9347	29.7405	-1.31383	8.89745e-24	1.49551e-22
CALCRL	107.066	15.7341	-2.76653	1.45839e-31	2.73608e-29
CNTFR	4.77834	0.924662	-2.36951	4.52419e-26	1.13841e-24
CRIM1	95.172	37.6995	-1.33599	7.61535e-25	1.50741e-23
CRLF1	9.04113	154.468	4.09466	8.76762e-05	0.000158342
CSF3R	52.2614	24.4804	-1.09412	1.48299e-16	1.00466e-15
ENG	327.581	105.186	-1.63891	5.49436e-27	1.70132e-25
FGFR2	38.3645	11.536	-1.73363	4.33232e-26	1.09553e-24
FGFR4	57.1773	9.7939	-2.54549	2.56234e-29	1.47248e-27
FLT4	19.8653	7.56159	-1.39349	2.14928e-20	2.29356e-19
GALR2	0.191026	0.945891	2.3079	1.88916e-08	5.15473e-08
GALR3	0.0141426	0.155493	3.45873	1.82772e-06	4.00879e-06
GCGR	0.0201852	0.262225	3.69943	2.96881e-11	1.11807e-10
GHR	4.73696	1.18158	-2.00325	2.32853e-28	1.01908e-26
GNRHR	0.0948611	0.556247	2.55184	0.00198961	0.00301741
GPER1	17.2946	3.66775	-2.23735	9.79475e-26	2.27401e-24
HNF4G	0.556302	6.49281	3.5449	3.80795e-23	5.82842e-22
HTR3A	0.185083	11.723	5.98502	3.69943e-25	7.6616e-24
HTR3B	0.0220389	0.587025	4.7353	3.77822e-05	7.11817e-05
HTR3C	6.48422	0.263353	-4.62186	8.08833e-32	1.89334e-29
IL12RB2	0.670541	2.10329	1.64925	1.63566e-05	3.21846e-05
IL17RD	1.24978	3.17506	1.34511	4.84116e-09	1.41201e-08
IL18R1	11.9701	4.15385	-1.52692	1.03979e-15	6.42224e-15
IL1RL1	35.1839	4.77546	-2.8812	7.55672e-24	1.2854e-22
IL1RL2	0.934596	4.6335	2.30969	6.47246e-23	9.59586e-22
IL20RA	20.8099	6.23082	-1.73978	1.88849e-21	2.30439e-20
IL20RB	0.914881	13.0691	3.83643	1.08319e-13	5.33032e-13
IL22RA2	0.108326	1.98085	4.19267	1.34668e-22	1.90469e-21
IL2RA	3.22083	8.83238	1.45537	1.81397e-11	7.00414e-11
IL31RA	0.121456	2.20629	4.18312	1.46172e-13	7.07719e-13
IL5RA	4.60381	0.971111	-2.24512	9.47688e-22	1.19586e-20
LEPR	23.163	6.27455	-1.88424	4.01884e-28	1.65923e-26
LGR4	6.06349	39.5914	2.70697	2.36304e-29	1.37029e-27
LHCGR	0.0323944	0.241999	2.90118	0.0194494	0.0255616
LIFR	60.7418	20.5962	-1.56031	1.7823e-22	2.47957e-21
MC4R	0.0295	0.220693	2.90326	8.95977e-10	2.83071e-09
MCHR1	0.246346	1.06345	2.10999	9.18209e-15	5.11643e-14
MET	56.6138	153.585	1.43981	0.00108088	0.00169903
MLNR	0.0805704	0.214305	1.41134	0.00720585	0.0101026
MTNR1A	0.0323722	0.511211	3.98109	1.54555e-11	6.00803e-11
NMBR	0.232204	0.0924824	-1.32814	1.13289e-13	5.55665e-13
NPR1	56.8676	9.27312	-2.61648	6.7837e-31	8.01324e-29
NPR3	25.274	7.0715	-1.83757	1.11684e-21	1.39687e-20
NR2E1	0.011537	0.328184	4.83016	2.64953e-14	1.39906e-13
NR4A1	163.932	49.6219	-1.72405	1.34058e-15	8.19083e-15
NR4A3	37.3009	7.97735	-2.22523	3.19127e-16	2.08302e-15
NR5A1	0.0214056	0.249775	3.54457	5.87255e-06	1.2177e-05
NR5A2	4.24924	1.84108	-1.20665	4.85698e-10	1.58392e-09
OPRD1	0.137833	0.722018	2.38911	0.000265482	0.000452006
PGR	2.09393	0.641945	-1.70569	1.99936e-24	3.69932e-23
PTGER4	39.9999	13.899	-1.52502	2.86885e-28	1.22816e-26
PTGFR	5.15492	2.39755	-1.10439	3.05776e-22	4.13459e-21
PTH1R	11.2615	2.89386	-1.96033	9.29617e-29	4.48378e-27
RXFP1	6.50196	0.752895	-3.11035	1.99855e-31	3.22741e-29
RXFP2	0.707604	0.110871	-2.67406	6.89039e-27	2.09545e-25
RXRG	8.74546	1.77091	-2.30404	1.86385e-26	5.1301e-25
S1PR1	110.914	15.0732	-2.87938	1.97068e-32	9.64902e-30
SDC2	86.1413	40.3326	-1.09476	1.98831e-21	2.41925e-20
SSTR1	16.4293	3.342	-2.29748	1.28497e-26	3.66331e-25
TEK	76.6857	7.85686	-3.28693	1.19273e-32	7.66475e-30
TGFBR2	280.596	89.0694	-1.65549	6.05016e-31	7.2816e-29
TGFBR3	38.7443	6.34593	-2.61008	6.50727e-31	7.75855e-29
THRB	6.51	3.13967	-1.05204	6.09789e-19	5.44205e-18
TIE1	52.2478	12.9025	-2.01772	1.17286e-29	7.57611e-28
TNFRSF11A	1.72727	4.09213	1.24436	5.53569e-09	1.60376e-08
TNFRSF17	3.5999	12.0861	1.74731	3.57565e-11	1.33498e-10
TNFRSF18	3.54575	22.3071	2.65334	5.26208e-21	6.0752e-20
TNFRSF21	48.3987	194.613	2.00757	2.9304e-26	7.74811e-25
TNFRSF25	3.01584	10.7497	1.83366	3.95675e-17	2.87216e-16
TNFRSF9	1.59121	4.31907	1.44059	1.52736e-09	4.70376e-09
TSHR	0.052763	0.451826	3.09817	2.4567e-15	1.45559e-14
TUBB3	0.0503352	1.10974	4.46252	1.12512e-29	7.32333e-28
VIPR1	61.1719	6.31087	-3.27696	2.17194e-28	9.57118e-27
ICAM2	19.2056	7.01184	-1.45366	1.64236e-27	5.72469e-26
ITGAL	27.0004	11.7937	-1.19497	1.13594e-20	1.25415e-19
PAK1	20.9746	48.7866	1.21784	2.82228e-25	6.00088e-24
TYROBP	781.108	277.591	-1.49256	2.06156e-25	4.50734e-24
FCGR3A	301.291	135.045	-1.15771	1.23249e-19	1.20302e-18
FCGR3B	16.1065	3.11621	-2.36977	1.82076e-18	1.54239e-17
NCR1	1.33693	0.62661	-1.09328	2.86298e-15	1.67967e-14
SHC3	10.8284	3.30725	-1.71111	2.62597e-23	4.10047e-22
CD244	6.03709	2.40894	-1.32546	2.18463e-18	1.836e-17
PRKCG	0.0720278	0.353268	2.29414	8.44484e-09	2.39411e-08
SH2D1B	3.27031	0.93714	-1.80309	7.79979e-23	1.14179e-21
PRF1	53.5405	21.8355	-1.29395	6.78266e-17	4.78329e-16
PAK6	4.38177	9.82507	1.16495	6.29552e-15	3.57751e-14
PAK5	0.235081	0.0914581	-1.36198	2.96007e-18	2.45056e-17
MAP3K8	40.6478	18.9707	-1.0994	8.73049e-16	5.43711e-15
CTLA4	3.29195	6.87083	1.06154	4.0828e-08	1.07483e-07
CBLC	4.48518	41.6176	3.21396	2.2021e-27	7.43207e-26
CDK4	34.4742	69.4412	1.01027	8.17526e-15	4.58544e-14
PDK1	2.27175	7.6665	1.75476	1.46028e-27	5.15339e-26
PRKCQ	14.7292	5.07169	-1.53815	7.2355e-26	1.74e-24
TRAJ1	0.809935	1.99025	1.29707	0.02373	0.0308332
TRAV18	0.295802	0.681961	1.20506	0.00432014	0.00625197
TRBJ1-2	1.5571	3.78452	1.28125	7.91534e-05	0.000143836
TRDJ1	4.65043	1.59314	-1.54549	3.32632e-12	1.39545e-11
TRGJP2	17.3547	3.99997	-2.11727	5.83873e-22	7.60854e-21
TRGJP1	1.85571	0.421363	-2.13884	5.11105e-17	3.66625e-16
TRGC2	16.8919	7.67773	-1.13758	1.85546e-16	1.23964e-15
CLEC4E	17.7337	5.52233	-1.68314	7.69868e-22	9.81179e-21
SKP2	1.99152	5.17096	1.37656	1.45314e-14	7.91059e-14
CEACAM8	3.69668	0.726172	-2.34785	2.12578e-14	1.13424e-13
FCN3	359.359	15.2676	-4.55688	1.4462e-30	1.40839e-28
IRAK1	65.8337	155.7	1.24187	2.42222e-23	3.80794e-22
AIM2	2.81823	20.6772	2.87518	6.62556e-13	2.99206e-12
ZBTB16	33.6585	6.55923	-2.35937	4.14717e-21	4.85836e-20
CLEC6A	2.57948	0.84796	-1.60501	3.50825e-14	1.82679e-13
ADCY8	3.15044	0.327971	-3.26391	6.55211e-30	4.68621e-28
ARG1	0.9161	0.409964	-1.16001	3.12051e-16	2.03937e-15
CCNA2	2.91284	23.8981	3.0364	8.66652e-29	4.21997e-27
SAMHD1	82.0024	37.9605	-1.11117	6.74959e-25	1.34649e-23
PRKDC	23.5013	54.2576	1.20708	3.39146e-15	1.98107e-14
CLEC4D	2.00576	0.872	-1.20175	6.58862e-12	2.67235e-11
PIAS3	18.2142	38.3786	1.07524	4.27798e-19	3.9011e-18
WNT2B	2.57997	1.1068	-1.22095	3.54427e-20	3.68059e-19
UCHL1	9.6266	113.153	3.5551	4.89346e-09	1.42579e-08
TRIM45	1.96146	5.0987	1.3782	1.96604e-15	1.17672e-14
TRIM6	2.46254	5.81461	1.23954	1.33601e-06	2.97015e-06
TRIM67	0.0252759	0.149389	2.56324	4.52015e-16	2.90508e-15
TRIM9	0.192785	1.36822	2.82724	8.09109e-06	1.65129e-05
TRIM71	1.82262	0.715315	-1.34936	6.82144e-22	8.77706e-21
TRIM58	3.505	1.01779	-1.78397	3.03768e-27	9.87342e-26
TRIM47	23.3543	47.9617	1.03819	7.95438e-13	3.55564e-12
TRIM15	0.028187	2.01574	6.16013	1.24406e-13	6.07973e-13
MAP1LC3C	16.5305	6.81723	-1.27787	1.48258e-17	1.12717e-16
IRF8	37.3381	18.512	-1.01219	6.09791e-19	5.44205e-18
NLRC4	15.8201	3.95677	-1.99936	1.41659e-30	1.38484e-28
CFTR	15.7622	6.60859	-1.25405	6.4615e-18	5.13765e-17
AHSG	0.0141685	0.24601	4.11796	5.26323e-07	1.22294e-06
P2RY14	12.1118	4.54362	-1.41449	5.90781e-22	7.6907e-21
E2F1	10.1793	29.8344	1.55134	4.38171e-14	2.25584e-13
LST1	63.6242	25.2992	-1.33048	7.46127e-23	1.09599e-21
DUSP1	1568.5	524.732	-1.57973	3.05081e-21	3.62897e-20
CLEC9A	1.40933	0.581352	-1.27753	1.33527e-16	9.11537e-16
PACSIN1	0.33423	2.01828	2.59421	1.18481e-17	9.10554e-17
ZBP1	1.65202	3.57985	1.11566	9.16542e-08	2.32023e-07
JAK3	6.78264	14.3478	1.08091	5.82382e-15	3.31981e-14
WNT3A	17.9032	1.01092	-4.14648	5.65165e-32	1.64933e-29
TRPM2	3.49246	7.90809	1.17909	2.28152e-11	8.71451e-11
LRRK2	102.672	27.1874	-1.91704	6.50337e-25	1.30042e-23
UNC5CL	1.95354	16.9434	3.11657	8.66174e-26	2.03691e-24
PROS1	80.6488	29.429	-1.45441	4.4387e-27	1.41038e-25
GAS6	143.92	42.6019	-1.75628	1.52293e-30	1.46081e-28
CD300LF	47.0322	14.188	-1.72897	2.28271e-28	1.00419e-26
APOBEC3B	2.03622	10.5139	2.36833	2.44634e-13	1.1574e-12
CDKN2A	1.55194	18.7473	3.59454	9.23878e-13	4.10175e-12
DCN	281.947	101.128	-1.47925	3.791e-23	5.80597e-22
PLA2G4A	12.7655	68.2254	2.41805	3.59779e-10	1.19233e-09
PPARGC1B	3.86036	1.51014	-1.35405	6.33009e-20	6.37637e-19
GATA6	32.651	9.23681	-1.82166	7.94278e-28	3.02478e-26
SNCA	2.85719	0.948252	-1.59126	4.05292e-26	1.03307e-24
F11	8.0557	1.13014	-2.83351	4.71659e-28	1.91022e-26
HSPD1	61.0657	154.215	1.33651	4.84376e-27	1.52767e-25
CD5L	3.83028	0.264941	-3.8537	2.27317e-31	3.47304e-29
RARRES2	272.376	129.982	-1.06729	3.22017e-17	2.36181e-16
KCNJ8	34.7545	15.1719	-1.19579	2.57929e-23	4.03004e-22
CLEC1B	0.70383	0.247387	-1.50846	1.06195e-24	2.06051e-23
JAM3	14.3417	5.8998	-1.28148	2.92686e-20	3.07067e-19
PMAIP1	10.7361	35.6985	1.73339	8.94498e-12	3.58403e-11
MIR23B	4.58187	2.11598	-1.11461	4.90337e-07	1.14328e-06
PTGES	10.1948	80.047	2.97301	1.38878e-25	3.12476e-24
FCN1	20.0843	6.08827	-1.72196	1.49916e-20	1.62494e-19
SRXN1	0.0371926	0.108438	1.54378	0.000659817	0.00106552
C1QC	1038.95	508.631	-1.03043	1.39376e-17	1.06249e-16
C1QB	1550.89	537.096	-1.52985	1.6556e-24	3.11066e-23
C1QA	1554.6	537.317	-1.5327	1.17838e-26	3.40503e-25
CD37	54.3274	24.6196	-1.14188	1.26727e-20	1.39132e-19
MMP7	35.2909	158.161	2.16402	5.09984e-05	9.47516e-05
NLRP11	0.0283648	0.638238	4.49192	1.95099e-05	3.80142e-05
SELE	16.9022	2.23659	-2.91784	5.28712e-11	1.93434e-10
RCAN1	60.8798	18.0626	-1.75296	2.88912e-25	6.12258e-24
SMAD7	47.4893	22.217	-1.09594	1.54971e-21	1.90834e-20
ABCG1	58.6476	22.5801	-1.37702	2.9304e-26	7.74811e-25
MEFV	3.30229	1.05808	-1.64202	5.59756e-24	9.72917e-23
SCARF1	28.8898	13.2227	-1.12755	3.18102e-20	3.32094e-19
SMAD6	30.2042	4.87613	-2.63094	1.03587e-27	3.82492e-26
KAT2B	32.1085	15.0476	-1.09342	9.91952e-24	1.65207e-22
CD36	65.6125	8.54106	-2.94148	1.09356e-30	1.12509e-28
BCL2A1	80.0815	34.2911	-1.22364	2.59954e-18	2.16473e-17
ACHE	2.77229	15.506	2.48368	3.82993e-06	8.11903e-06
TRAIP	1.52773	5.59233	1.87206	7.91871e-29	3.93085e-27
CAV1	1277.09	121.173	-3.39772	9.32289e-33	7.20829e-30
SIRPA	92.1537	39.4559	-1.2238	7.62568e-24	1.29368e-22
SOCS2	45.3205	11.2797	-2.00643	1.82194e-22	2.52921e-21
CAMK2A	0.948363	0.337238	-1.49167	1.1619e-22	1.66092e-21
LY86	69.6772	26.429	-1.39857	1.78218e-24	3.32642e-23
CASP12	2.58383	0.460292	-2.48889	6.80164e-29	3.47619e-27
FLI1	29.4409	9.19934	-1.67822	1.65714e-29	1.02377e-27
CTNNAL1	105.56	39.9033	-1.40348	3.54908e-25	7.38019e-24
GRK5	58.6965	9.96261	-2.55868	5.40853e-32	1.64284e-29
GJA1	264.211	116.947	-1.17584	1.82076e-18	1.54239e-17
RUSC1	15.0869	34.7762	1.2048	7.62567e-24	1.29368e-22
TRAF5	4.3059	10.668	1.3089	1.96947e-16	1.31067e-15
C4BPB	2.50325	11.0718	2.14501	0.0113075	0.0154185
TRIB3	16.7172	41.8459	1.32375	3.52391e-13	1.63686e-12
SIGLEC11	3.71698	0.719036	-2.37	2.09675e-27	7.09519e-26
SIGLEC7	9.12016	4.02003	-1.18185	1.15373e-16	7.93676e-16
SIGLEC6	4.5159	1.87057	-1.27154	1.17333e-19	1.14747e-18
SIGLEC5	0.461702	0.146114	-1.65987	3.66675e-16	2.3818e-15
SIGLEC1	32.969	14.0982	-1.2256	6.04908e-19	5.40604e-18
LAIR1	33.7275	16.7376	-1.01083	3.49525e-19	3.22419e-18
C8B	19.6404	3.3427	-2.55474	4.20167e-24	7.41908e-23
CARD16	38.0339	15.1355	-1.32935	1.33699e-27	4.77109e-26
CFB	1.24371	3.65932	1.55692	1.6717e-13	8.04629e-13
MST1R	13.821	28.6843	1.0534	1.2542e-09	3.90018e-09
MAP3K3	40.2254	19.8136	-1.02162	3.17787e-24	5.71816e-23
CFP	0.917052	0.271076	-1.75831	1.34174e-26	3.79961e-25
EGR1	824.577	241.495	-1.77166	1.80364e-14	9.71909e-14
F2RL2	1.23481	2.88248	1.22302	0.0133239	0.0179682
F2RL3	21.9084	5.87888	-1.89787	3.3644e-13	1.56733e-12
CD27	5.65748	12.6945	1.16597	6.46925e-10	2.08097e-09
CEACAM1	7.51419	32.0174	2.09117	9.84327e-21	1.09577e-19
HMGB3	22.0589	252.653	3.51772	8.90755e-30	6.10958e-28
PLK1	1.61358	15.605	3.27366	3.23558e-31	4.56109e-29
WDR62	0.905335	4.8435	2.41953	9.26787e-24	1.5547e-22
DAB2IP	50.7101	24.0577	-1.07578	1.85474e-19	1.77709e-18
CD300E	10.3991	4.04495	-1.36227	1.17568e-17	9.04081e-17
RASGEF1B	19.3582	7.52057	-1.36403	5.24005e-26	1.30058e-24
NOXA1	11.3455	27.7804	1.29195	6.8769e-11	2.47831e-10
TRPV2	76.2849	20.8534	-1.87112	5.45194e-31	6.95531e-29
ATF3	154.831	46.4991	-1.73542	1.1617e-14	6.41022e-14
TPSB2	123.985	33.1861	-1.90152	3.98145e-20	4.11615e-19
GAB1	20.3026	8.42889	-1.26825	1.91832e-24	3.56749e-23
SPI1	193.398	65.5535	-1.56082	2.51217e-27	8.36567e-26
NLRP7	0.15105	0.659982	2.1274	1.21774e-05	2.43653e-05
ETS1	118.247	52.8251	-1.16251	2.87849e-20	3.02242e-19
OTUB2	1.2362	3.08677	1.32019	1.43924e-16	9.76883e-16
XDH	0.813019	14.4141	4.14805	6.90813e-25	1.37596e-23
TCF4	14.7816	6.99598	-1.0792	3.1285e-20	3.26745e-19
TLR10	1.56551	3.45298	1.14121	7.55811e-08	1.93406e-07
C7	161.445	44.3123	-1.86527	1.72823e-22	2.40697e-21
C6	10.7539	2.26136	-2.24959	1.0235e-14	5.68204e-14
SCAMP5	5.28851	12.1847	1.20413	1.33943e-13	6.51335e-13
NLRP14	0.234824	0.116434	-1.01207	4.13832e-13	1.90766e-12
NCKAP1L	36.6133	15.8812	-1.20505	7.66267e-23	1.12364e-21
BMX	5.76576	2.37688	-1.27844	2.03654e-27	6.92832e-26
SERPING1	369.994	138.985	-1.41257	2.92637e-28	1.25069e-26
PRKCE	22.1923	6.20969	-1.83747	2.31566e-29	1.34895e-27
SLAMF9	0.850272	3.431	2.01263	1.69186e-09	5.18788e-09
SLAMF7	15.126	32.7227	1.11327	7.74779e-08	1.98021e-07
