# Supplementary material for: Cuproptosis-Related lncRNA Prognostic Profile, Immune microenvironment, Response and Immune-related gene prognostic index in LUAD
Source: Research Square preprint supplement (doi:10.21203/rs.3.rs-3313594/v1), 2023-09-12
Supplement: Supplementary file 3 [file 2c332e1406c8c0583e0b3444.xlsx]

## Sheet: Sheet1
CLEC4M
RAET1L
CXCL16
SLPI
CXCL2
CXCL3
DEFA3
DEFA4
SFTPD
PGLYRP1
TMSB15A
S100A5
IL6
ANOS1
A2M
SFTPA1
HJV
SFTPA2
RBP4
FABP4
CRABP1
DUOX1
RBP2
FABP12
CTSG
SOCS3
TFR2
CSRP1
JUN
EPPIN
DES
JUND
CLDN4
MASP1
HRG
ARRB1
STAB2
AQP9
BIRC5
AGER
CCL14
CCL16
CCR3
ACKR4
TAFA3
NFATC4
FOS
PIK3R1
IGKV1-17
IGKV1D-13
CMA1
CCN1
EDN1
FGF10
SEMA3G
SEMA4B
SEMA5A
SEMA6A
SLIT2
ACKR1
EDNRB
GPR17
PTGDR2
ROBO2
ANGPTL5
ANGPTL7
APLN
BMP2
CAT
CMTM5
CSF3
CCN2
FGF14
VEGFD
GAL
GDF10
HBEGF
HDGF
IL17D
IL20
IL33
INHBB
LEFTY2
LTBP4
MDK
NRG3
OGN
PDGFB
PRLH
PTHLH
TRH
TSHB
VIP
ACVRL1
ADCYAP1R1
ADRB1
ADRB2
AGTR2
ANGPT1
ANGPT4
ANGPTL1
ANGPTL4
AVPR1B
BMPR2
CALCRL
FGFR2
FGFR4
FLT4
GALR2
GCGR
GHR
GPER1
HTR3C
IL17RD
IL1RL1
IL20RA
IL5RA
LIFR
MTNR1A
NMBR
NPR1
NR4A1
NR4A3
NR5A2
PGR
PTGFR
PTH1R
RXFP1
RXRG
S1PR1
TEK
TGFBR2
THRB
TIE1
TNFRSF18
TSHR
VIPR1
SHC3
PAK6
PAK5
MAP3K8
SKP2
FCN3
IRAK1
ZBTB16
ADCY8
WNT2B
TRIM71
E2F1
DUSP1
WNT3A
LRRK2
PROS1
APOBEC3B
GATA6
SNCA
F11
KCNJ8
JAM3
MIR23B
MMP7
SELE
RCAN1
SMAD7
SMAD6
CD36
TRAIP
CAV1
SOCS2
CAMK2A
CASP12
GRK5
RUSC1
TRIB3
CFB
CFP
EGR1
F2RL3
DAB2IP
ATF3
GAB1
OTUB2
TCF4
TLR10
C7
C6
SERPING1
PRKCE
