# Supplementary material for: Cuproptosis-Related lncRNA Prognostic Profile, Immune microenvironment, Response and Immune-related gene prognostic index in LUAD
Source: Research Square preprint supplement (doi:10.21203/rs.3.rs-3313594/v1), 2023-09-12
Supplement: Supplementary file 5 [file e882209a552b3e38c6c8ded3.xlsx]

## Sheet: Sheet1
Patient	TIDE
TCGA-05-4244-01A-01R-1107-07	-0.27
TCGA-05-4249-01A-01R-1107-07	-0.28
TCGA-05-4250-01A-01R-1107-07	-0.15
TCGA-05-4382-01A-01R-1206-07	-0.07
TCGA-05-4384-01A-01R-1755-07	-0.05
TCGA-05-4389-01A-01R-1206-07	-0.06
TCGA-05-4390-01A-02R-1755-07	-0.19
TCGA-05-4395-01A-01R-1206-07	-0.37
TCGA-05-4396-01A-21R-1858-07	-0.21
TCGA-05-4397-01A-01R-1206-07	-0.6
TCGA-05-4398-01A-01R-1206-07	-0.26
TCGA-05-4402-01A-01R-1206-07	-0.21
TCGA-05-4403-01A-01R-1206-07	0.05
TCGA-05-4405-01A-21R-1858-07	-0.14
TCGA-05-4410-01A-21R-1858-07	0.01
TCGA-05-4415-01A-22R-1858-07	-0.48
TCGA-05-4417-01A-22R-1858-07	-0.06
TCGA-05-4418-01A-01R-1206-07	-0.19
TCGA-05-4420-01A-01R-1206-07	-0.34
TCGA-05-4422-01A-01R-1206-07	-0.15
TCGA-05-4424-01A-22R-1858-07	-0.16
TCGA-05-4425-01A-01R-1755-07	-0.1
TCGA-05-4426-01A-01R-1206-07	-0.09
TCGA-05-4427-01A-21R-1858-07	-0.39
TCGA-05-4430-01A-02R-1206-07	-0.12
TCGA-05-4432-01A-01R-1206-07	-0.16
TCGA-05-4433-01A-22R-1858-07	0.09
TCGA-05-4434-01A-01R-1206-07	-0.11
TCGA-05-5420-01A-01R-1628-07	-0.07
TCGA-05-5423-01A-01R-1628-07	-0.19
TCGA-05-5425-01A-02R-1628-07	-0.23
TCGA-05-5428-01A-01R-1628-07	-0.41
TCGA-05-5429-01A-01R-1628-07	-0.14
TCGA-05-5715-01A-01R-1628-07	-0.05
TCGA-35-3615-01A-01R-0946-07	-0.22
TCGA-35-4122-01A-01R-1107-07	-0.17
TCGA-35-4123-01A-01R-1107-07	-0.15
TCGA-35-5375-01A-01R-1628-07	-0.23
TCGA-38-4625-01A-01R-1206-07	-0.35
TCGA-38-4625-11A-01R-1758-07	0.15
TCGA-38-4626-01A-01R-1206-07	0.1
TCGA-38-4626-11A-01R-1758-07	0.13
TCGA-38-4627-01A-01R-1206-07	-0.03
TCGA-38-4627-11A-01R-1758-07	0.09
TCGA-38-4628-01A-01R-1206-07	-0.23
TCGA-38-4629-01A-02R-1206-07	-0.11
TCGA-38-4630-01A-01R-1206-07	-0.61
TCGA-38-4631-01A-01R-1755-07	-0.11
TCGA-38-4632-01A-01R-1755-07	-0.25
TCGA-38-4632-11A-01R-1755-07	0.07
TCGA-38-6178-01A-11R-1755-07	-0.28
TCGA-38-7271-01A-11R-2039-07	0.15
TCGA-44-2655-01A-01R-0946-07	-0.407692
TCGA-44-2656-01B-06R-A277-07	-0.25
TCGA-50-8460-01A-11R-2326-07	-0.25
TCGA-53-7624-01A-11R-2066-07	-0.36
TCGA-53-7626-01A-12R-2066-07	0.04
TCGA-53-7813-01A-11R-2170-07	-0.45
TCGA-55-1592-01A-01R-0946-07	-0.24
TCGA-55-1594-01A-01R-0946-07	-0.4
TCGA-55-1595-01A-01R-0946-07	-0.34
TCGA-55-1596-01A-01R-0946-07	-0.41
TCGA-55-5899-01A-11R-1628-07	-0.18
TCGA-55-6543-01A-11R-1755-07	-0.02
TCGA-55-6642-01A-11R-1858-07	-0.13
TCGA-55-6712-01A-11R-1858-07	0.01
TCGA-55-6968-01A-11R-1949-07	-0.2
TCGA-55-6968-11A-01R-1949-07	0.17
TCGA-55-6969-01A-11R-1949-07	-0.24
TCGA-55-6969-11A-01R-1949-07	0.18
TCGA-55-6970-01A-11R-1949-07	-0.38
TCGA-55-6970-11A-01R-1949-07	0.21
TCGA-55-6971-01A-11R-1949-07	0.03
TCGA-55-6971-11A-01R-1949-07	0.15
TCGA-55-6972-01A-11R-1949-07	-0.25
TCGA-55-6972-11A-01R-1949-07	0.23
TCGA-55-6975-01A-11R-1949-07	-0.29
TCGA-55-6975-11A-01R-1949-07	0.13
TCGA-55-6978-01A-11R-1949-07	0.01
TCGA-55-6978-11A-01R-1949-07	0.16
TCGA-55-6979-01A-11R-1949-07	0.1
TCGA-55-6979-11A-01R-1949-07	0.21
TCGA-55-6980-01A-11R-1949-07	0.04
TCGA-55-6980-11A-01R-1949-07	0.19
TCGA-55-6981-01A-11R-1949-07	-0.24
TCGA-55-6981-11A-01R-1949-07	0.2
TCGA-55-6982-01A-11R-1949-07	-0.07
TCGA-55-6982-11A-01R-1949-07	0.21
TCGA-55-6984-01A-11R-1949-07	-0.09
TCGA-55-6984-11A-01R-1949-07	0.15
TCGA-55-6985-01A-11R-1949-07	-0.07
TCGA-55-6985-11A-01R-1949-07	0.12
TCGA-55-6986-01A-11R-1949-07	-0.28
TCGA-55-6986-11A-01R-1949-07	0.1
TCGA-55-6987-01A-11R-1949-07	-0.08
TCGA-55-7227-01A-11R-2039-07	-0.02
TCGA-55-7281-01A-11R-2039-07	0.02
TCGA-55-7283-01A-11R-2039-07	-0.26
TCGA-55-7284-01B-11R-2241-07	0.08
TCGA-55-7570-01A-11R-2039-07	-0.62
TCGA-55-7573-01A-11R-2039-07	0
TCGA-55-7574-01A-11R-2039-07	0.03
TCGA-55-7576-01A-11R-2066-07	-0.31
TCGA-55-7724-01A-11R-2170-07	-0.23
TCGA-55-7725-01A-11R-2170-07	-0.45
TCGA-55-7726-01A-11R-2170-07	-0.35
TCGA-55-7727-01A-11R-2170-07	-0.57
TCGA-55-7815-01A-11R-2170-07	-0.26
TCGA-55-7816-01A-11R-2170-07	0.19
TCGA-55-7903-01A-11R-2170-07	-0.37
TCGA-55-7907-01A-11R-2170-07	-0.14
TCGA-55-7910-01A-11R-2170-07	-0.32
TCGA-55-7911-01A-11R-2170-07	-0.13
TCGA-55-7913-01B-11R-2241-07	-0.54
TCGA-55-7914-01A-11R-2170-07	-0.48
TCGA-55-7994-01A-11R-2187-07	-0.08
TCGA-55-7995-01A-11R-2187-07	-0.01
TCGA-55-8085-01A-11R-2241-07	-0.3
TCGA-55-8087-01A-11R-2241-07	-0.23
TCGA-55-8089-01A-11R-2241-07	0.14
TCGA-55-8090-01A-11R-2241-07	-0.02
TCGA-55-8091-01A-11R-2241-07	-0.06
TCGA-55-8092-01A-11R-2241-07	-0.2
TCGA-55-8094-01A-11R-2241-07	-0.25
TCGA-55-8096-01A-11R-2241-07	-0.17
TCGA-55-8097-01A-11R-2241-07	-0.09
TCGA-55-8203-01A-11R-2241-07	-0.17
TCGA-55-8204-01A-11R-2241-07	-0.21
TCGA-55-8205-01A-11R-2241-07	0.01
TCGA-55-8206-01A-11R-2241-07	0.06
TCGA-55-8208-01A-11R-2241-07	0.07
TCGA-55-8299-01A-11R-2287-07	0
TCGA-55-8301-01A-11R-2287-07	-0.05
TCGA-55-8302-01A-11R-2326-07	0.01
TCGA-55-8505-01A-11R-2403-07	-0.2
TCGA-55-8506-01A-11R-2403-07	-0.07
TCGA-55-8507-01A-11R-2403-07	-0.23
TCGA-55-8510-01A-11R-2403-07	0.09
TCGA-55-8511-01A-11R-2403-07	-0.12
TCGA-55-8512-01A-11R-2403-07	0.09
TCGA-55-8514-01A-11R-2403-07	-0.04
TCGA-55-8614-01A-11R-2403-07	-0.13
TCGA-55-8615-01A-11R-2403-07	-0.14
TCGA-55-8616-01A-11R-2403-07	-0.32
TCGA-55-8620-01A-11R-2403-07	-0.17
TCGA-55-8621-01A-11R-2403-07	0.19
TCGA-55-A48X-01A-11R-A24H-07	-0.04
TCGA-55-A48Y-01A-11R-A24H-07	-0.39
TCGA-55-A48Z-01A-12R-A24X-07	-0.11
TCGA-55-A490-01A-11R-A466-07	-0.2
TCGA-55-A491-01A-11R-A24H-07	-0.15
TCGA-55-A492-01A-11R-A24H-07	-0.09
TCGA-55-A493-01A-11R-A24H-07	-0.06
TCGA-55-A494-01A-11R-A24X-07	-0.35
TCGA-55-A4DF-01A-11R-A24H-07	-0.36
TCGA-55-A4DG-01A-11R-A24H-07	-0.27
TCGA-55-A57B-01A-12R-A39D-07	-0.11
TCGA-62-8394-01A-11R-2326-07	-0.16
TCGA-62-8395-01A-11R-2326-07	0.01
TCGA-62-8397-01A-11R-2326-07	-0.04
TCGA-62-8398-01A-11R-2326-07	-0.17
TCGA-62-8399-01A-21R-2326-07	-0.35
TCGA-62-8402-01A-11R-2326-07	-0.16
TCGA-62-A46O-01A-11R-A24H-07	-0.63
TCGA-62-A46P-01A-11R-A24H-07	-0.02
TCGA-62-A46R-01A-11R-A24H-07	-0.28
TCGA-62-A46S-01A-11R-A24H-07	-0.19
TCGA-62-A46U-01A-11R-A24H-07	0.06
TCGA-62-A46V-01A-11R-A24H-07	-0.4
TCGA-62-A46Y-01A-11R-A24H-07	-0.07
TCGA-62-A471-01A-12R-A24H-07	-0.35
TCGA-62-A472-01A-11R-A24H-07	-0.43
TCGA-64-1676-01A-01R-0946-07	-0.26
TCGA-64-1677-01A-01R-0946-07	-0.47
TCGA-64-1678-01A-01R-0946-07	-0.44
TCGA-64-1679-01A-21R-2066-07	-0.05
TCGA-64-1680-01A-02R-0946-07	-0.19
TCGA-64-1681-01A-11R-2066-07	-0.04
TCGA-64-5774-01A-01R-1628-07	-0.11
TCGA-64-5775-01A-01R-1628-07	-0.28
TCGA-64-5778-01A-01R-1628-07	-0.11
TCGA-64-5781-01A-01R-1628-07	-0.19
TCGA-64-5815-01A-01R-1628-07	0.03
TCGA-67-3770-01A-01R-0946-07	-0.08
TCGA-67-3771-01A-01R-0946-07	-0.15
TCGA-67-3772-01A-01R-0946-07	-0.17
TCGA-67-3773-01A-01R-0946-07	-0.1
TCGA-67-3774-01A-01R-0946-07	0.01
TCGA-67-4679-01B-01R-1755-07	-0.15
TCGA-67-6215-01A-11R-1755-07	-0.16
TCGA-67-6216-01A-11R-1755-07	-0.05
TCGA-67-6217-01A-11R-1755-07	0
TCGA-69-7760-01A-11R-2170-07	-0.58
TCGA-69-7763-01A-11R-2170-07	-0.02
TCGA-69-7764-01A-11R-2170-07	-0.15
TCGA-69-7765-01A-11R-2170-07	-0.18
TCGA-69-7973-01A-11R-2187-07	-0.31
TCGA-69-7974-01A-11R-2187-07	-0.02
TCGA-69-7978-01A-11R-2187-07	0.07
TCGA-69-7980-01A-11R-2187-07	-0.06
TCGA-69-8253-01A-11R-2287-07	-0.06
TCGA-69-8254-01A-11R-2287-07	-0.04
TCGA-69-8255-01A-11R-2287-07	-0.19
TCGA-69-A59K-01A-11R-A262-07	-0.17
TCGA-71-6725-01A-11R-1858-07	-0.18
TCGA-71-8520-01A-11R-2403-07	-0.08
TCGA-73-4658-01A-01R-1755-07	-0.1
TCGA-73-4659-01A-01R-1206-07	-0.02
TCGA-73-4662-01A-01R-1206-07	-0.25
TCGA-73-4666-01A-01R-1206-07	-0.13
TCGA-73-4668-01A-01R-1206-07	-0.29
TCGA-73-4670-01A-01R-1206-07	-0.48
TCGA-73-4675-01A-01R-1206-07	-0.04
TCGA-73-4676-01A-01R-1755-07	-0.33
TCGA-73-4676-11A-01R-1755-07	0.13
TCGA-73-4677-01A-01R-1206-07	-0.15
TCGA-73-7498-01A-12R-2187-07	-0.05
TCGA-73-7499-01A-11R-2187-07	-0.27
TCGA-73-A9RS-01A-11R-A41B-07	-0.4
TCGA-75-5122-01A-01R-1755-07	0.18
TCGA-75-5125-01A-01R-1755-07	-0.25
TCGA-75-5126-01A-01R-1755-07	0.02
TCGA-75-5146-01A-01R-1628-07	-0.1
TCGA-75-5147-01A-01R-1628-07	-0.42
TCGA-75-6203-01A-11R-1755-07	0.16
TCGA-75-6205-01A-11R-1755-07	0.13
TCGA-75-6206-01A-11R-1755-07	-0.05
TCGA-75-6207-01A-11R-1755-07	-0.55
TCGA-75-6211-01A-11R-1755-07	-0.31
TCGA-75-6212-01A-11R-1755-07	-0.04
TCGA-75-6214-01A-41R-1949-07	-0.22
TCGA-75-7025-01A-12R-1949-07	0.04
TCGA-75-7027-01A-11R-1949-07	-0.35
TCGA-75-7030-01A-11R-1949-07	0.17
TCGA-75-7031-01A-11R-1949-07	-0.37
TCGA-78-7143-01A-11R-2039-07	-0.26
TCGA-78-7145-01A-11R-2039-07	-0.53
TCGA-78-7146-01A-11R-2039-07	-0.61
TCGA-78-7147-01A-11R-2039-07	-0.25
TCGA-78-7148-01A-11R-2039-07	-0.23
TCGA-78-7149-01A-11R-2039-07	-0.1
TCGA-78-7150-01A-21R-2039-07	-0.41
TCGA-78-7152-01A-11R-2039-07	-0.18
TCGA-78-7153-01A-11R-2039-07	-0.33
TCGA-78-7154-01A-11R-2039-07	-0.28
TCGA-78-7155-01A-11R-2039-07	-1.29
TCGA-78-7156-01A-11R-2039-07	-0.25
TCGA-78-7158-01A-11R-2039-07	-0.57
TCGA-78-7159-01A-11R-2039-07	-0.2
TCGA-78-7160-01A-11R-2039-07	-0.2
TCGA-78-7161-01A-11R-2039-07	0.04
TCGA-78-7162-01A-21R-2066-07	-0.1
TCGA-78-7163-01A-12R-2066-07	-0.1
TCGA-78-7166-01A-12R-2066-07	-0.27
TCGA-78-7167-01A-11R-2066-07	-0.12
TCGA-78-7220-01A-11R-2039-07	-0.56
TCGA-78-7535-01A-11R-2066-07	-0.07
TCGA-78-7536-01A-11R-2066-07	-0.29
TCGA-78-7537-01A-11R-2066-07	0.01
TCGA-78-7539-01A-11R-2066-07	-0.13
TCGA-78-7540-01A-11R-2066-07	0.06
TCGA-78-7542-01A-21R-2066-07	-0.14
TCGA-78-7633-01A-11R-2066-07	-0.11
TCGA-78-8640-01A-11R-2403-07	-0.17
TCGA-78-8648-01A-11R-2403-07	0.2
TCGA-78-8655-01A-11R-2403-07	-0.03
TCGA-78-8660-01A-11R-2403-07	-0.03
TCGA-78-8662-01A-11R-2403-07	-0.53
TCGA-80-5607-01A-31R-1949-07	-0.21
TCGA-80-5608-01A-31R-1949-07	-0.02
TCGA-80-5611-01A-01R-1628-07	-0.21
TCGA-83-5908-01A-21R-2287-07	-0.08
TCGA-86-6562-01A-11R-1755-07	-0.18
TCGA-86-6851-01A-11R-1949-07	0.13
TCGA-86-7701-01A-11R-2170-07	-0.27
TCGA-86-7711-01A-11R-2066-07	-0.16
TCGA-86-7713-01A-11R-2066-07	-0.41
TCGA-86-7714-01A-12R-2170-07	-0.23
TCGA-86-7953-01A-11R-2187-07	-0.26
TCGA-86-7954-01A-11R-2187-07	-0.07
TCGA-86-7955-01A-11R-2187-07	-0.48
TCGA-86-8055-01A-11R-2241-07	-0.17
TCGA-86-8056-01A-11R-2241-07	-0.25
TCGA-86-8073-01A-11R-2241-07	-0.24
TCGA-86-8074-01A-11R-2241-07	-0.42
TCGA-86-8075-01A-11R-2241-07	-0.17
TCGA-86-8076-01A-31R-2241-07	-0.13
TCGA-86-8279-01A-11R-2287-07	-0.36
TCGA-86-8280-01A-11R-2287-07	0.04
TCGA-86-8281-01A-11R-2287-07	-0.2
TCGA-86-8358-01A-11R-2326-07	-0.21
TCGA-86-8359-01A-11R-2326-07	-0.08
TCGA-86-8585-01A-11R-2403-07	-0.12
TCGA-86-8668-01A-11R-2403-07	0.1
TCGA-86-8669-01A-11R-2403-07	-0.06
TCGA-86-8671-01A-11R-2403-07	0.32
TCGA-86-8672-01A-21R-2403-07	-0.13
TCGA-86-8673-01A-11R-2403-07	-0.28
TCGA-86-8674-01A-21R-2403-07	-0.15
TCGA-86-A456-01A-11R-A24H-07	-0.01
TCGA-86-A4D0-01A-11R-A24H-07	-0.89
TCGA-86-A4JF-01A-11R-A24X-07	-0.12
TCGA-86-A4P7-01A-11R-A24X-07	0.07
TCGA-86-A4P8-01A-11R-A24X-07	0.22
TCGA-91-6828-01A-11R-1858-07	-0.14
TCGA-91-6828-11A-01R-1858-07	0.13
TCGA-91-6829-01A-21R-1858-07	-0.27
TCGA-91-6829-11A-01R-1858-07	0.19
TCGA-91-6830-01A-11R-1949-07	-0.25
TCGA-91-6831-01A-11R-1858-07	-0.44
TCGA-91-6831-11A-02R-1858-07	0.1
TCGA-91-6835-01A-11R-1858-07	0.09
TCGA-91-6835-11A-01R-1858-07	0.07
TCGA-91-6836-01A-21R-1858-07	-0.72
TCGA-91-6836-11A-01R-1858-07	0.13
TCGA-91-6840-01A-11R-1949-07	-0.15
TCGA-91-6847-01A-11R-1949-07	-0.65
TCGA-91-6847-11A-01R-1949-07	0.13
TCGA-91-6848-01A-11R-1949-07	-0.3
TCGA-91-6849-01A-11R-1949-07	-0.07
TCGA-91-6849-11A-01R-1949-07	0.17
TCGA-91-7771-01A-11R-2170-07	-0.17
TCGA-91-8496-01A-11R-2403-07	0.02
TCGA-91-8497-01A-11R-2403-07	0.16
TCGA-91-8499-01A-11R-2403-07	-0.77
TCGA-91-A4BC-01A-11R-A24H-07	0.02
TCGA-91-A4BD-01A-11R-A24H-07	0
TCGA-93-7347-01A-11R-2187-07	0.07
TCGA-93-7348-01A-21R-2039-07	-0.17
TCGA-93-8067-01A-11R-2287-07	-0.2
TCGA-93-A4JO-01A-21R-A24X-07	-0.02
TCGA-93-A4JP-01A-11R-A24X-07	0.07
TCGA-95-7039-01A-11R-1949-07	-0.14
TCGA-95-7043-01A-11R-1949-07	-0.04
TCGA-95-7562-01A-11R-2241-07	-0.57
TCGA-95-7567-01A-11R-2066-07	-0.22
TCGA-95-7944-01A-11R-2187-07	-0.03
TCGA-95-7947-01A-11R-2187-07	-0.42
TCGA-95-7948-01A-11R-2187-07	-0.4
TCGA-95-8494-01A-11R-2326-07	-0.19
TCGA-95-A4VK-01A-11R-A262-07	-0.19
TCGA-95-A4VN-01A-11R-A262-07	-0.16
TCGA-97-7547-01A-11R-2039-07	-0.12
TCGA-97-7552-01A-11R-2039-07	0.25
TCGA-97-7553-01A-21R-2039-07	0.14
TCGA-97-7554-01A-11R-2039-07	-0.13
TCGA-97-7937-01A-11R-2170-07	-0.55
TCGA-97-7938-01A-11R-2170-07	-0.35
TCGA-97-8171-01A-11R-2287-07	-0.38
TCGA-97-8174-01A-11R-2287-07	0.1
TCGA-97-8175-01A-11R-2287-07	-0.14
TCGA-97-8177-01A-11R-2287-07	-0.06
TCGA-97-8552-01A-11R-2403-07	0.13
TCGA-97-A4LX-01A-11R-A24X-07	0.13
TCGA-97-A4M0-01A-11R-A24X-07	0
TCGA-97-A4M1-01A-11R-A24X-07	0.06
TCGA-97-A4M2-01A-12R-A24X-07	0.15
TCGA-97-A4M3-01A-11R-A24X-07	-0.03
TCGA-97-A4M5-01A-11R-A24X-07	-0.02
TCGA-97-A4M6-01A-11R-A24X-07	0.02
TCGA-97-A4M7-01A-11R-A24X-07	0.08
TCGA-99-7458-01A-11R-2039-07	-0.16
TCGA-99-8025-01A-11R-2241-07	-0.19
TCGA-99-8028-01A-11R-2241-07	0.12
TCGA-99-8032-01A-11R-2241-07	-0.13
TCGA-99-8033-01A-11R-2241-07	-0.33
TCGA-99-AA5R-01A-11R-A39D-07	0.21
TCGA-J2-8192-01A-11R-2241-07	-0.04
TCGA-J2-8194-01A-11R-2241-07	-0.27
TCGA-J2-A4AD-01A-11R-A24H-07	-0.45
TCGA-J2-A4AE-01A-21R-A24H-07	-0.02
TCGA-J2-A4AG-01A-11R-A24H-07	-0.03
TCGA-L4-A4E5-01A-11R-A24X-07	-0.46
TCGA-L4-A4E6-01A-11R-A24H-07	0.15
TCGA-L9-A443-01A-12R-A24H-07	-0.29
TCGA-L9-A444-01A-21R-A24H-07	0.04
TCGA-L9-A50W-01A-12R-A39D-07	-0.09
TCGA-L9-A5IP-01A-21R-A39D-07	-0.21
TCGA-L9-A743-01A-43R-A39D-07	0.04
TCGA-L9-A7SV-01A-11R-A39D-07	-0.8
TCGA-L9-A8F4-01A-11R-A39D-07	-0.13
TCGA-MN-A4N1-01A-11R-A24X-07	-0.26
TCGA-MN-A4N4-01A-12R-A24X-07	-0.11
TCGA-MN-A4N5-01A-11R-A24X-07	-0.07
TCGA-MP-A4SV-01A-11R-A24X-07	-0.33
TCGA-MP-A4SW-01A-21R-A24X-07	0.02
TCGA-MP-A4SY-01A-21R-A24X-07	-0.24
TCGA-MP-A4T4-01A-11R-A262-07	0.1
TCGA-MP-A4T6-01A-32R-A262-07	0.01
TCGA-MP-A4T7-01A-11R-A24X-07	-0.15
TCGA-MP-A4T8-01A-11R-A24X-07	-0.41
TCGA-MP-A4T9-01A-11R-A24X-07	0.03
TCGA-MP-A4TA-01A-21R-A24X-07	-0.15
TCGA-MP-A4TC-01A-11R-A24X-07	-0.05
TCGA-MP-A4TD-01A-32R-A262-07	-0.06
TCGA-MP-A4TE-01A-22R-A466-07	-0.08
TCGA-MP-A4TF-01A-11R-A262-07	-0.39
TCGA-MP-A4TH-01A-31R-A262-07	0.13
TCGA-MP-A4TI-01A-21R-A24X-07	0.16
TCGA-MP-A4TK-01A-11R-A24X-07	-0.03
TCGA-MP-A5C7-01A-11R-A262-07	-0.02
TCGA-NJ-A4YF-01A-12R-A262-07	-0.39
TCGA-NJ-A4YG-01A-22R-A262-07	-0.12
TCGA-NJ-A4YP-01A-11R-A262-07	-0.3
TCGA-NJ-A4YQ-01A-11R-A262-07	-0.11
TCGA-NJ-A55R-01A-11R-A262-07	-0.04
TCGA-NJ-A7XG-01A-12R-A39D-07	-0.08
TCGA-O1-A52J-01A-11R-A262-07	0.15
TCGA-S2-AA1A-01A-12R-A39D-07	0.09
